# Supplementary material
Source: publisher figshare collection journal article supplement (https://plos.figshare.com/ndownloader/files/38504807)
Supplement: Supplementary file 1 [file 38504807]

Publication date,Publication Year,DOI,Discipline,Country,DA,Data_Section Text:Generated,Data_Generated,Data_Shared,Data_location,URL,Accessions,Repositories,Code_Section Text:Generated,Code_Generated,Code_Shared,Code_location,Preprint_Match,Preprint_DOI,Preprint_Date,Preprint_URL,Preprint_Server
09/08/2019,2019,10.1371/journal.ppat.1007970,"Viruses,Pathology and laboratory medicine,Cellular types,Microbiology,Immunodeficiency viruses,Immunology,T cells,Animal cells,Cytotoxicity,RNA viruses,Toxicology,Biology and life sciences,Medicine and health sciences,Enzyme-linked immunoassays,Pathogens,Cell biology,White blood cells,Immune cells,Immunoassays,Research and analysis methods,Lentivirus,Blood cells,Retroviruses,Cytotoxicity assay,HIV,Organisms,Medical microbiology,Microbial pathogens,T helper cells,Immunologic techniques,Viral pathogens,HIV-1,Cytotoxic T cells",United States of America,All relevant data are within the manuscript and its Supporting Information files.,Method,Yes,Yes,Supplementary Information,N/A,N/A,N/A,N/A,No,No,N/A,No,NA,NA,NA,NA
16/07/2021,2021,10.1371/journal.pone.0254770,"Blood pressure,Biology and life sciences,Pulmonology,Cardiovascular procedures,Revascularization,Blood vessels,Drugs,Pulmonary hypertension,Anatomy,Vasodilators,Chemistry,Cardiovascular anatomy,Arteries,Pharmacology,Lesions,Physical sciences,Surgical and invasive medical procedures,Medicine and health sciences,Vascular medicine,Signs and symptoms,Clinical medicine,Angioplasty,Oxygen,Chemical elements,Pulmonary arteries",Japan,All relevant data are within the paper and its Supporting Information files.,Method,Yes,Yes,Supplementary Information,N/A,N/A,N/A,N/A,No,No,N/A,No,NA,NA,NA,NA
13/05/2022,2022,10.1371/journal.pone.0267429,"Neuroscience,Emotions,Cognition,Neuroimaging,Imaging techniques,Cardiology,Biology and life sciences,Medicine and health sciences,Anatomy,Heart rate,Relaxation (psychology),Diagnostic medicine,Cognitive science,Radiology and imaging,Magnetic resonance imaging,Research and analysis methods,Functional magnetic resonance imaging,Social sciences,Nutrition,Beverages,Decision making,Cognitive psychology,Diet,Bioassays and physiological analysis,Brain mapping,Integumentary system,Skin,Psychology,Skin physiology,Diagnostic radiology",Italy,"Raw data cannot be shared because participants did not give consent to use the data for other projects. Furthermore, data cannot be anonymized because containing face video. The Research Ethics Committee of Politecnico di Milano has recommended these restrictions. For any information, an email can be sent to Prof. Sergio Cerutti, vice-president of the Research Ethical Committee of Politecnico di Milano (sergio.cerutti@polimi.it).",Method,Yes,Yes,Supplementary Information,N/A,N/A,N/A,Method,Yes,No,N/A,No,NA,NA,NA,NA
08/03/2022,2022,10.1371/journal.pgph.0000147,"Survey research,Surveys,Medicine and health sciences,Socioeconomic aspects of health,Public and occupational health,People and places,Economic analysis,Economic impact analysis,Kenya,Research and analysis methods,Economics,Geographical locations,Research design,Population groupings,Infectious diseases,Medical conditions,Health care,Children,Families,Social sciences,Pandemics,Age groups,Epidemiology,COVID 19,Africa,Health economics,Viral diseases",United States of America,All data used in these analyses are publicly available and available via download upon creation of a user account at https://www.pmadata.org/data/request-access-datasets. PMA staff grant access upon creation of the account.,Method,Yes,Yes,Supplementary Information|Online,https://www.pmadata.org/data/request-access-datasets,N/A,N/A,N/A,No,No,N/A,No,NA,NA,NA,NA
16/01/2019,2019,10.1371/journal.pone.0209178,"Parasitic diseases,Anatomy,Arthropoda,Genetics,Invertebrates,Agriculture,Fish farming,Disease vectors,Medicine and health sciences,Biology and life sciences,Eukaryota,Lice,Fisheries,Species interactions,Kidneys,Salmon,Fish,Organisms,Cell cultures,Animals,Gene expression,Biological cultures,Insect vectors,Research and analysis methods,Aquaculture,Osteichthyes,Infectious diseases,Insects,Renal system,Vertebrates",United States of America,All relevant data are within the paper and its Supporting Information files.,Method,Yes,Yes,Supplementary Information,N/A,N/A,N/A,N/A,No,No,N/A,No,NA,NA,NA,NA
18/09/2020,2020,10.1371/journal.pone.0216019,"Earth sciences,Transportation infrastructure,Biology and life sciences,Social sciences,Eukaryota,Landforms,Rivers,Wetlands,Flooding,Fish,Surface water,Behavior,Marine and aquatic sciences,Zoology,Engineering and technology,Topography,Psychology,Freshwater environments,Bodies of water,Eating habits,Invertebrates,Transportation,Organisms,Hydrology,Ecology and environmental sciences,Animals,Aquatic environments,Vertebrates,Freshwater fish,Geomorphology,Canals,Habits,Plankton,Zooplankton,Civil engineering",United States of America,All relevant data are uploaded to the OSF repository and publicly accessible via the following DOI: 10.17605/OSF.IO/Q4SFZ.,Method,Yes,Yes,Online,"10.17605/OSF.IO/Q4SFZ, OSF.IO/Q4SFZ",N/A,Open Science Framework,Method,Yes,No,N/A,Yes,10.1101/610055,15/04/2019,http://dx.doi.org/10.1101/610055,bioRxiv
11/03/2020,2020,10.1371/journal.pone.0229640,"Paleobiology,Paleozoology,Earth sciences,Saurischia,Minerals,Jurassic period,Toes,Eukaryota,Animals,Vertebrate paleontology,Prehistoric animals,Dinosaurs,Shale,Sediment,Mesozoic era,Body limbs,Limestone,Paleontology,Archosauria,Theropoda,Anatomy,Organisms,Feet,Geologic time,Geology,Hip,Mineralogy,Pelvis,Biology and life sciences,Legs,Medicine and health sciences,Musculoskeletal system,Petrology,Sedimentary geology",United Kingdom,All photogrammetric models and photosets used to construct them are available from the Dryad database (10.5061/dryad.n6f068k),Method,Yes,Yes,Supplementary Information|Online,10.5061/dryad.n6f068k,N/A,Dryad Digital Repository,N/A,No,No,N/A,No,NA,NA,NA,NA
18/07/2022,2022,10.1371/journal.pone.0271541,"Etiology,Animal cells,Spleen,Physiology,Blood cells,Cell biology,Pathology and laboratory medicine,Cirrhosis,Medicine and health sciences,Immune physiology,Gastroenterology and hepatology,Cellular types,Red blood cells,Biology and life sciences,Public and occupational health,Vaccination and immunization,Ascites,Portal hypertension,Preventive medicine,Liver diseases,Immunology",Germany,"Data (patient level) cannot be shared publicly because of legal reasons (data protection acts in Germany). However, anonymized data are available from the authors (Corresponding author) on reasonable request. Requests for anonymized data may also be sent to direktion1med@uke.de (office of the I. Department of Medicine, University Medical Center Hamburg-Eppendorf).",Method,Yes,No,N/A,N/A,N/A,N/A,N/A,No,No,N/A,No,NA,NA,NA,NA
08/04/2022,2022,10.1371/journal.pone.0266812,"Homozygosity,Immune system proteins,Physical sciences,Molecular biology techniques,Recombination-based assay,Research and analysis methods,Animal studies,Physiology,Model organisms,Genetics,Antibodies,Medicine and health sciences,Immunology,Biochemistry,Animal models,Recombinant proteins,Glycerol,Heterozygosity,Proteins,Monomers,Library screening,Chemistry,Experimental organism systems,Immune physiology,Mouse models,Polymer chemistry,Molecular biology assays and analysis techniques,Heredity,Biology and life sciences,Molecular biology,Monoclonal antibodies",United States of America,All relevant data are within the paper and its Supporting Information files.,Method,Yes,No,N/A,N/A,N/A,N/A,Method,Yes,No,N/A,No,NA,NA,NA,NA
24/06/2022,2022,10.1371/journal.pone.0269439,"Learning and memory,Learning,Vigilance,Memory recall,Cognition,Attention,Biology and life sciences,Physiological processes,Cognitive psychology,Social sciences,Psychology,Database and informatics methods,Neuroscience,Physiology,Cognitive science,Memory,Research and analysis methods,Memory consolidation,Information retrieval,Long term memory,Sleep",United Kingdom,Study data can be retrieved via the following link: osf.io/vcfgm.,Method,Yes,Yes,Online,osf.io/vcfgm,N/A,Open Science Framework,Method,Yes,No,N/A,Yes,10.31234/osf.io/w435f,05/11/2021,http://dx.doi.org/10.31234/osf.io/w435f,PsyArXiv
16/01/2019,2019,10.1371/journal.pone.0210253,"Addicts,Age distribution,Retroviruses,Organisms,Liver diseases,Addiction,Viral transmission and infection,Drug users,Medical microbiology,Medicine and health sciences,Cardiology,Pathogens,Social sciences,HIV diagnosis and management,Europe,European Union,Viruses,Diagnostic medicine,HIV,Pathology and laboratory medicine,Hepatitis,France,Psychology,People and places,Hepatitis C,Population metrics,Virology,Viral diseases,Microbial pathogens,Myocardial infarction,Geographical locations,Infectious hepatitis,Population biology,Microbiology,Viral pathogens,Lentivirus,Immunodeficiency viruses,Viral load,RNA viruses,Infectious diseases,Gastroenterology and hepatology,Biology and life sciences",France,"Due to French law there are restrictions on publicly sharing the data of this study. Data requests may be submitted to the FHDH and must be approved by the French data protection authority, la Commission Nationale de lâ€™Informatique et des LibertÃ©s. Data requests may be sent to Sophie Grabar at the FHDH (ophie.grabar@iplesp.upmc.fr). French law requires that everyone who wishes to access cohorts data or clinical study data on humans must ask the French data protection authority, la Commission Nationale de l'Informatique et des LibertÃ©s (CNIL), for permission by filling a form which can be provided by Grabar at the FHDH (sophie.grabar@iplesp.upmc.fr). For further information, please see: https://www.cnil.fr/.",Method,Yes,Yes,Online,https://www.cnil.fr/,N/A,Commission Nationale de l'Informatique et des LibertÃ©s,Method,Yes,No,N/A,No,NA,NA,NA,NA
28/05/2019,2019,10.1371/journal.pone.0217368,"Diagnostic medicine,Model organisms,Chronobiology,Research and analysis methods,Inflammation,Bacterial toxins,Signs and symptoms,Cell disruption,Circadian rhythms,Toxicology,Specimen disruption,Circadian oscillators,Pathology and laboratory medicine,Toxins,Animal models,Mouse models,Physiology,Biochemistry,Experimental organism systems,Specimen preparation and treatment,Endotoxins,Immune physiology,Toxic agents,Animal studies,Immunology,Biology and life sciences,Spleen,Medicine and health sciences,Mechanical treatment of specimens,Immune response",United States of America,All files are available from the OSF database DOI 10.17605/OSF.IO/5ZGQ4.,Method,Yes,Yes,Online,"OSF.IO/5ZGQ4, 10.17605/OSF.IO/5ZGQ4",N/A,"Open Science Framework, OSF.IO",Method,Yes,No,N/A,No,NA,NA,NA,NA
25/09/2020,2020,10.1371/journal.pone.0239655,"Preventive medicine,Data visualization,Medicine and health sciences,Nosocomial infections,Health care,Nutrition,Biology and life sciences,Computer and information sciences,Vaccination and immunization,Data management,Charts,Pediatric infections,Pediatrics,Pulmonology,Health care facilities,Immunology,Hospitals,Infectious diseases,Medical conditions,Infographics,Pneumonia,Public and occupational health",Ethiopia,The data sets used for this study are available as Supporting Information.,Method,Yes,Yes,N/A,N/A,N/A,N/A,N/A,No,No,N/A,No,NA,NA,NA,NA
01/12/2020,2020,10.1371/journal.pone.0239937,"Physical sciences,Clinical medicine,Small interfering RNA,Research and analysis methods,Nucleic acids,Biochemistry,Genetics,Gene regulation,Progesterone,Normal distribution,Molecular biology techniques,Lipid hormones,Inflammation,Immune response,Probability distribution,Medicine and health sciences,Biology and life sciences,Immunology,Polymerase chain reaction,RNA,Signs and symptoms,Non-coding RNA,Mathematics,Probability theory,Surgical and invasive medical procedures,Reverse transcriptase-polymerase chain reaction,Transfection,Gene expression,Artificial gene amplification and extension,Molecular biology,Hormones,Biopsy",United Kingdom,All relevant data are within the manuscript and Supporting Information files.,Method,Yes,Yes,Supplementary Information,N/A,N/A,N/A,N/A,No,No,N/A,No,NA,NA,NA,NA
28/03/2019,2019,10.1371/journal.pntd.0007213,"RNA viruses,Earth sciences,Pathology and laboratory medicine,Geographical locations,Mosquitoes,Medicine and health sciences,Dengue virus,Pathogens,Infectious diseases,Chikungunya infection,Climatology,Animals,Neglected tropical diseases,Chikungunya virus,Microbial pathogens,Aedes aegypti,Viral diseases,Insect vectors,Invertebrates,Togaviruses,Asia,Tropical diseases,Viral pathogens,People and places,Arthropoda,Virology,Climate change,Insects,Eukaryota,Organisms,Atmospheric science,Disease vectors,Medical microbiology,Biology and life sciences,Microbiology,Species interactions,Alphaviruses,Flaviviruses,Africa,Viral transmission and infection,Viruses",United States of America,All relevant data are within the manuscript and its Supporting Information files.,Method,Yes,No,N/A,N/A,N/A,N/A,Method,Yes,No,N/A,Yes,10.1101/172221,05/08/2017,http://dx.doi.org/10.1101/172221,bioRxiv
14/07/2020,2020,10.1371/journal.pntd.0008438,"Diagnostic medicine,Insects,Species interactions,Earth sciences,Blood,Microbial pathogens,Oceania,Population metrics,Geographical locations,Islands,Zika virus,Eukaryota,Vector-borne diseases,Animals,Landforms,Body fluids,Insect vectors,Pathology and laboratory medicine,Medical microbiology,Blood transfusion,Viral pathogens,Clinical laboratory sciences,Population biology,Geomorphology,Topography,Invertebrates,Physiology,People and places,Anatomy,Organisms,Aedes aegypti,Arthropoda,Flaviviruses,Microbiology,Transfusion medicine,Disease vectors,RNA viruses,Population density,Viruses,Australia,Infectious diseases,Biology and life sciences,Medicine and health sciences,Mosquitoes,Pathogens,Hematology",Australia,All relevant data are within the manuscript and its Supporting Information files.,Method,Yes,No,N/A,N/A,N/A,N/A,Method,Yes,No,N/A,No,NA,NA,NA,NA
02/09/2021,2021,10.1371/journal.pone.0256748,"Staphylococcus aureus,Pseudomonas,Bacteria,Biology and life sciences,Bacterial biofilms,Engineering and technology,Medicine and health sciences,Silver,Catheters,Bacterial pathogens,Pathogens,Bioengineering,Antibiotics,Antimicrobials,Physical sciences,Medical devices and equipment,Bacteriology,Medical microbiology,Drugs,Chemical elements,Pseudomonas aeruginosa,Chemistry,Pathology and laboratory medicine,Microbial pathogens,Biotechnology,Organisms,Microbial control,Plant anatomy,Leaves,Pharmacology,Staphylococcus,Microbiology,Plant science,Antibacterials,Biofilms",Ethiopia,All relevant data are within the paper and its Supporting information files.,Fulltext,Yes,Yes,Supplementary Information,N/A,N/A,N/A,N/A,No,No,N/A,No,NA,NA,NA,NA
05/05/2020,2020,10.1371/journal.pone.0232782,"Immune system proteins,Microbiology,Eukaryota,Research and analysis methods,Serology,Physiology,Amniotes,Virology,Mammals,Animal diseases,Pathology and laboratory medicine,Antibodies,Virions,Medicine and health sciences,Immunologic techniques,Vertebrates,Immunology,Organisms,Foot and mouth disease,Enzyme-linked immunoassays,Biochemistry,Capsids,Proteins,Swine,Viral structure,Immune physiology,Vaccines,Zoology,Infectious diseases,Animals,Infectious disease control,Biology and life sciences,Immunoassays",Argentina,All relevant data are within the manuscript and its Supporting Information files.,Method,Yes,No,N/A,N/A,N/A,N/A,N/A,No,No,N/A,No,NA,NA,NA,NA
18/04/2019,2019,10.1371/journal.pone.0215464,Missing,France,All relevant data are within the manuscript and its Supporting Information files.,Method,Yes,No,N/A,N/A,N/A,N/A,Method,Yes,No,N/A,No,NA,NA,NA,NA
22/11/2021,2021,10.1371/journal.pone.0260309,"Radiology and imaging,Muscles,Diagnostic radiology,Cirrhosis,Addiction,Biological tissue,Neuroimaging,Research and analysis methods,Addicts,Medicine and health sciences,Medical risk factors,Imaging techniques,Liver diseases,Tomography,Epidemiology,Computed axial tomography,Musculoskeletal system,Alcoholics,Connective tissue,Psychology,Fatty liver,Diagnostic medicine,Gastroenterology and hepatology,Anatomy,Biology and life sciences,Social sciences,Adipose tissue,Neuroscience,Pancreatitis,Abdominal muscles",South Korea,All relevant data are within the manuscript and its Supporting Information files.,Method,Yes,Yes,Supplementary Information,N/A,N/A,N/A,N/A,No,No,N/A,No,NA,NA,NA,NA
12/05/2020,2020,10.1371/journal.pone.0233129,"Bioengineering,Engineering and technology,Arrhythmia,Cardiovascular anatomy,Jugular vein,Signs and symptoms,Myocardial infarction,Anatomy,Medicine and health sciences,Diagnostic medicine,Pathology and laboratory medicine,Vascular medicine,Medical risk factors,Biotechnology,Pacemakers,Cardiology,Epidemiology,Medical devices and equipment,Cardiac pacing,Blood vessels,Hemorrhage,Biology and life sciences,Atrial fibrillation,Veins",South Korea,All relevant data are within the manuscript and its Supporting Information files.,Method,Yes,Yes,Supplementary Information,N/A,N/A,N/A,Method,Yes,No,N/A,No,NA,NA,NA,NA
17/06/2022,2022,10.1371/journal.pcbi.1010174,"Molecular biology,Database and informatics methods,Biological tissue,Proteomic databases,Renal system,Cardiovascular anatomy,Biological databases,Liver,Connective tissue,Proteomics,Medicine and health sciences,Molecular biology assays and analysis techniques,Protein expression,Tendons,Protein abundance,Research and analysis methods,Biochemistry,Anatomy,Gene expression and vector techniques,Molecular biology techniques,Biology and life sciences,Kidneys,Brain,Heart",United Kingdom,The R code used for downstream data analyses and for plotting of results presented in this manuscript are available from https://github.com/Ananth-Prakash/Mouse_Rat_DDA_proteomics.,Method,Yes,Yes,Supplementary Information|Online,https://github.com/Ananth-Prakash/Mouse_Rat_DDA_proteomics,N/A,Github,DA|Method,Yes,Yes,Online,Yes,10.1101/2021.12.20.473413,22/12/2021,http://dx.doi.org/10.1101/2021.12.20.473413,bioRxiv
04/01/2021,2021,10.1371/journal.pone.0244616,"Biology and life sciences,Biochemistry,Ribosomes,Sequence analysis,People and places,Genetics,Earth sciences,Research and analysis methods,Ecology and environmental sciences,Ribosomal RNA,Australia,Database and informatics methods,Oceania,Landforms,Topography,Cell biology,Geographical locations,Community structure,Islands,Geomorphology,Bioinformatics,Community ecology,RNA,Cellular structures and organelles,Dinoflagellates,Genomics,Ecology,Metagenomics,Non-coding RNA,Sequence alignment,Protists,Eukaryota,Nucleic acids,Organisms",The Netherlands,Data are available in NCBI: https://www.ncbi.nlm.nih.gov/bioproject/PRJNA666082.,Fulltext,Yes,Yes,Supplementary Information|Online,"www.geneious.com, https://www.ncbi.nlm.nih.gov/bioproject/PRJNA666082, http://hmmer.org/",PRJNA666082,NCBI Bioproject,Supplementary,Yes,Yes,Online,No,NA,NA,NA,NA
05/06/2020,2020,10.1371/journal.pone.0234322,"Medical personnel,Survey research,Surveys,Cognitive science,Medical education,Systematic reviews,Singapore,Social sciences,Professions,Asia,Health care,Education,Medicine and health sciences,Neuroscience,Cognition,Health care providers,Geographical locations,Medical humanities,Research and analysis methods,Medical doctors,Population groupings,Research design,Sociology,Biology and life sciences,Research assessment,People and places",United Kingdom,All relevant data is within the paper.,Method,Yes,No,N/A,N/A,N/A,N/A,Method,Yes,No,N/A,No,NA,NA,NA,NA
28/05/2021,2021,10.1371/journal.pone.0251336,"Mathematical and statistical techniques,Pain management,Drugs,Social sciences,Economics,Geographical locations,Physical sciences,Opioids,Statistics,Health insurance,Research and analysis methods,Management engineering,Pain,Physiotherapy,Physiology,People and places,Engineering and technology,Physiological parameters,Health care,Signs and symptoms,Statistical methods,United States,North America,Insurance,Mathematics,Analgesics,Body weight,Biology and life sciences,Forecasting,Clinical medicine,Medicine and health sciences,Pharmacology,Risk management,Health economics",United States of America,"Due to ethical restrictions by ATI Physical Therapy, the data underlying this study cannot be made publicly available. Instead, data are available upon request to Erik Kantz (Erik.Kantz@atipt.com). Data requests must include purpose and entity, data use agreements must be signed for data requests, and deidentified data (state/clinic/clinician) would be provided. Data requested for academic purposes will be provided â€œas isâ€. Certain elements of the data will need to be anonymized (e.g., states) if data are requested by business entities.",Method,Yes,Yes,Supplementary Information,N/A,N/A,N/A,N/A,No,No,N/A,No,NA,NA,NA,NA
03/03/2020,2020,10.1371/journal.pone.0228534,"Algorithms,Logic circuits,Nonlinear systems,Computer and information sciences,Machine learning,Physical sciences,Simulation and modeling,Applied mathematics,Cognitive science,Nonlinear dynamics,Biology and life sciences,Learning and memory,Social sciences,Mathematics,Learning,Artificial intelligence,Research and analysis methods,Cognitive psychology,Machine learning algorithms,Genetic algorithms,Electronics engineering,Neuroscience,Psychology,Systems science,Engineering and technology,Dynamical systems",United States of America,All data may be found in the paper itself.,Fulltext,Yes,No,N/A,N/A,N/A,N/A,N/A,No,No,N/A,No,NA,NA,NA,NA
18/04/2022,2022,10.1371/journal.pone.0266693,"Brain,Mental health and psychiatry,Research and analysis methods,Imaging techniques,Psychology,Neurodegenerative diseases,Memory recall,Animal cells,Brain mapping,Right hemisphere,Learning and memory,Radiology and imaging,Medicine and health sciences,Cellular types,Cerebral hemispheres,Medical conditions,Diagnostic medicine,Cellular neuroscience,Diagnostic radiology,Cognitive psychology,Anatomy,Memory,Neurons,Dementia,Cognitive science,Magnetoencephalography,Perception,Cell biology,Sensory perception,Neuroimaging,Vision,Magnetic resonance imaging,Social sciences,Biology and life sciences,Alzheimer's disease,Neurology,Neuroscience,Cognition",Japan,All relevant data are within the paper and its Supporting Information files.,Method,Yes,Yes,Supplementary Information,N/A,N/A,N/A,Method,Yes,No,N/A,No,NA,NA,NA,NA
31/05/2022,2022,10.1371/journal.ppat.1010515,"Genomics,Molecular evolution,Phylogenetic analysis,Virology,Microbial evolution,Biogeography,Viral evolution,Phylogenetics,Age distribution,Ecology and environmental sciences,Europe,Organismal evolution,Genetics,Earth sciences,Geographical locations,Evolutionary biology,Population metrics,Biology and life sciences,Geography,Microbiology,Phylogeography,Taxonomy,Computer and information sciences,Evolutionary immunology,Data management,Population biology,Population genetics,Evolutionary systematics,People and places",Switzerland,"All relevant data are within the manuscript and its Supporting information files or available on Github, VipR, and Genbank using the links and accession numbers within the manuscript and supporting files.",Fulltext,Yes,Yes,Supplementary Information|Online,nextstrain.org/enterovirus,N/A,N/A,N/A,No,Yes,Online,Yes,10.1101/2020.01.10.901553,19/01/2020,http://dx.doi.org/10.1101/2020.01.10.901553,bioRxiv
16/11/2020,2020,10.1371/journal.pcbi.1008356,"Signal transduction,Animal cells,Blood cells,Medicine and health sciences,Cell nucleus,Cellular types,White blood cells,Immunology,Antibody-producing cells,Signal filtering,Cell membranes,Signaling molecules,Nuclear membrane,B cells,Signal processing,Cellular structures and organelles,Cell biology,Cell signaling,Immune cells,Biology and life sciences,Cytosol,Engineering and technology",United States of America,All B cell imaging files are available at http://math.bu.edu/people/isaacson/data/2020-plos-comp-bio.zip.,Method,Yes,Yes,Online,http://math.bu.edu/people/isaacson/data/2020-plos-comp-bio.zip,N/A,N/A,Method,Yes,No,N/A,Yes,10.1101/2020.01.16.909333,18/01/2020,http://dx.doi.org/10.1101/2020.01.16.909333,bioRxiv
24/08/2020,2020,10.1371/journal.pone.0238046,"Medical devices and equipment,Cardiovascular imaging,Biology and life sciences,Hematology,Health care,Hospitals,Diagnostic radiology,Radiology and imaging,Health care facilities,Hemodynamics,Research and analysis methods,Medicine and health sciences,Cardiac surgery,Angioplasty,Cardiovascular procedures,Imaging techniques,Angiography,Cardiac arrest,Bioengineering,Coronary angioplasty,Cardiology,Cardiovascular medicine,Biotechnology,Myocardial infarction,Surgical and invasive medical procedures,Engineering and technology,Diagnostic medicine",United States of America,"These data are third-party, and are collected and maintained by the Agency for Healthcare Quality and Research (AHRQ) as a part of the Healthcare Cost and Utilization Project (HCUP). The sharing of the data used for this study is restricted by the AHRQ. Other authors may obtain these data from the AHRQ at https://www.hcup-us.ahrq.gov/ after completing the appropriate training and paying the data fee as outlined in the AHRQ guidelines followed by the authors of the data used in this study. Other authors are free to obtain the said data from the AHRQ to replicate the findings of this study. The current study authors did not have any additional privileges in requesting these data.",Method,Yes,Yes,Online,https://www.hcup-us.ahrq.gov/,N/A,Healthcare Cost and Utilization Project (HCUP),N/A,No,Yes,Online,No,NA,NA,NA,NA
30/10/2019,2019,10.1371/journal.pone.0223559,"Anatomy,Research and analysis methods,Tuberculosis,Health care,Mathematical and statistical techniques,Population metrics,Biology and life sciences,Physical sciences,Global health,Statistics,Blood counts,Statistical methods,Population biology,Medicine and health sciences,Tropical diseases,Socioeconomic aspects of health,Economics,Social sciences,Bacterial diseases,Linear regression analysis,Body fluids,Death rates,Public and occupational health,Regression analysis,Finance,Physiology,Mathematics,Blood,Infectious diseases",United States of America,The data underlying this study are third-party data which are publicly available from a separate manuscript published by Hogan et al (https://www.thelancet.com/journals/langlo/article/PIIS2214-109X(17)30472-2/fulltext.,Method,Yes,Yes,Online,https://www.thelancet.com/journals/langlo/article/PIIS2214-109X(17)30472-2/fulltext,N/A,N/A,N/A,No,No,N/A,No,NA,NA,NA,NA
01/07/2021,2021,10.1371/journal.pcbi.1008524,"Endocrinology,Social sciences,Reaction time,Lipid hormones,Mathematics,Cognitive neuroscience,Hormones,Regression analysis,Statistics,Psychology,Cognition,Testosterone,Learning and memory,Population groupings,Decision making,Research and analysis methods,Physical sciences,Endocrine physiology,Statistical methods,Biochemistry,Biology and life sciences,Physiology,Androgens,Cognitive psychology,Puberty,People and places,Age groups,Linear regression analysis,Learning,Mathematical and statistical techniques,Neuroscience,Cognitive science,Human learning,Medicine and health sciences",United States of America,All data is available on an Open Science Framework repository: https://osf.io/wq4te/.,Method,Yes,Yes,Online,https://osf.io/wq4te/,N/A,Open Science Framework,Method|Supplementary,Yes,No,N/A,Yes,10.1101/2020.12.02.407932,03/12/2020,http://dx.doi.org/10.1101/2020.12.02.407932,bioRxiv
10/07/2019,2019,10.1371/journal.pone.0219403,"Organic chemistry,Metabolites,Cell physiology,Cell metabolism,Biology and life sciences,Anatomy,Chemistry,Medicine and health sciences,Kidneys,Physiology,Biochemistry,Renal system,Organic compounds,Research and analysis methods,Bioassays and physiological analysis,Body fluids,Histology,Chemical compounds,Cell biology,Protein metabolism,Metabolic analysis,Urine,Physical sciences,Alcohols,Metabolism",Japan,All relevant data are within the manuscript and its Supporting Information files.,Method,Yes,Yes,Supplementary Information,N/A,N/A,N/A,N/A,No,No,N/A,No,NA,NA,NA,NA
24/04/2020,2020,10.1371/journal.pone.0232211,"Extraction techniques,Viral pathogens,Transferases,Genetics,Microbial pathogens,Carcinomas,Natural antisense transcripts,Medicine and health sciences,MicroRNAs,Enzymes,Biochemistry,RNA,Research and analysis methods,Oncology,Liver diseases,Non-coding RNA,Pathology and laboratory medicine,Gastroenterology and hepatology,Diagnostic medicine,Biology and life sciences,Cancers and neoplasms,Pathogens,Proteins,Hepatitis viruses,Hepatitis B virus,Cancer detection and diagnosis,Viruses,Aminotransferases,Organisms,Medical microbiology,Microbiology,Gastrointestinal tumors,Prognosis,Enzymology,Gene regulation,Hepatocellular carcinoma,Gene expression,RNA extraction,Biomarkers,Nucleic acids",Thailand,All relevant data are within the manuscript and its Supporting Information files.,Method,Yes,No,N/A,N/A,N/A,N/A,N/A,No,No,N/A,No,NA,NA,NA,NA
27/05/2021,2021,10.1371/journal.pone.0251443,"Sports science,Research and analysis methods,Clinical medicine,Cognitive science,Working memory,Memory,Electrophysiological techniques,Cognitive neuroscience,Ocular system,Sports,Brain electrophysiology,Computer and information sciences,Neuroscience,Cognition,Behavior,Social sciences,Medicine and health sciences,Head,Clinical neurophysiology,Psychology,Electroencephalography,Physiology,Physical activity,Attention,Exercise,Recreation,Target detection,Sports and exercise medicine,Electrophysiology,Cognitive psychology,Brain mapping,Neurophysiology,Imaging techniques,Eyes,Computer vision,Physical fitness,Learning and memory,Neuroimaging,Bioassays and physiological analysis,Anatomy,Biology and life sciences,Public and occupational health",China,All relevant data are within the manuscript and its Supporting information files.,Method,Yes,Yes,Supplementary Information,N/A,N/A,N/A,Method,Yes,No,N/A,No,NA,NA,NA,NA
28/02/2019,2019,10.1371/journal.pone.0212832,"Pharmacology,Blood pressure,Vascular medicine,Peptide hormones,Financial management,Kidneys,Metabolic disorders,Anatomy,Pharmaceutics,Drugs,Antihypertensive drugs,Social sciences,Diabetes mellitus,Medicine and health sciences,Endocrine disorders,Hormones,Renin-angiotensin system,Nephrology,Drug therapy,Biology and life sciences,Budgets,Renal system,Chronic kidney disease,Biochemistry,Finance,Endocrinology,Hypertension,Economics",Australia,All relevant data are within the paper and its Supporting Information files.,Fulltext,Yes,Yes,Supplementary Information,N/A,N/A,N/A,N/A,No,No,N/A,No,NA,NA,NA,NA
28/02/2019,2019,10.1371/journal.pone.0212805,"Pancreatic cancer,Physical sciences,Gastrointestinal tumors,Probability theory,Decision analysis,Surgical oncology,Research and analysis methods,Management engineering,Surgical and invasive medical procedures,Engineering and technology,Cancers and neoplasms,Clinical oncology,Markov models,Oncology,Epidemiology,Cancer treatment,Infectious disease epidemiology,Mathematics,Infectious diseases,Surgical resection,Clinical medicine,Medicine and health sciences",United Kingdom,All relevant data are within the manuscript and its Supporting Information files.,Method,Yes,No,N/A,N/A,N/A,N/A,Method,Yes,No,N/A,No,NA,NA,NA,NA
13/04/2022,2022,10.1371/journal.pone.0263872,"Earth sciences,Marine and aquatic sciences,Microeconomics,Organisms,Agriculture,Animals,Social sciences,Economics,Vertebrates,Welfare economics,Urban economics,Environmental economics,Marine fish,Fish,Development economics,Economic growth,Biology and life sciences,Eukaryota,Marine biology,Finance,Ecology and environmental sciences,Zoology,Fisheries science,Agricultural economics",Pakistan,Data used in this research is taken from world bank available at: https://datacatalog.worldbank.org/dataset/world-development-indicators.,Fulltext,Yes,Yes,Online,https://datacatalog.worldbank.org/dataset/world-development-indicators,N/A,N/A,N/A,No,No,N/A,No,NA,NA,NA,NA
13/06/2019,2019,10.1371/journal.pone.0218152,"People and places,Sports science,Colorectal cancer,Cognitive impairment,Age groups,Physical fitness,Surgical and invasive medical procedures,Public and occupational health,Sports and exercise medicine,Medicine and health sciences,Oncology,Exercise,Population groupings,Geriatrics,Frailty,Physical activity,Cognitive science,Cancers and neoplasms,Abdominal surgery,Cognitive neurology,Cognitive neuroscience,Elderly,Biology and life sciences,Neurology,Neuroscience",The Netherlands,All relevant data are within the manuscript and its Supporting Information files.,Method,Yes,Yes,Supplementary Information,N/A,N/A,N/A,N/A,No,No,N/A,No,NA,NA,NA,NA
01/03/2022,2022,10.1371/journal.pone.0264381,"Clutches,Geographic areas,Ecology,Reproductive physiology,Habitats,Geography,Urban areas,Ecology and environmental sciences,Urban geography,Insects,Predation,Social sciences,Diet,Medicine and health sciences,Entomology,Eukaryota,Invertebrates,Animals,Arthropoda,Human geography,Earth sciences,Physiology,Zoology,Oviposition,Biology and life sciences,Organisms,Community ecology,Nutrition,Trophic interactions,Moths and butterflies",United States of America,All metadata files are available from the Zenodo database (DOI: 10.5281/zenodo.6048157).,Method,Yes,Yes,Supplementary Information|Online,10.5281/zenodo.6048157,N/A,Zenodo,Method,Yes,No,N/A,No,NA,NA,NA,NA
27/02/2020,2020,10.1371/journal.pone.0228766,"Biology and life sciences,Bioenergetics,Exercise,Steroid hormones,Hormones,Blood,Physical activity,Physical fitness,Lipid hormones,Iron deficiency,Medicine and health sciences,Sports and exercise medicine,Nutrition,Blood sugar,Anatomy,Nutritional deficiencies,Cortisol,Strength training,Biological locomotion,Public and occupational health,Blood plasma,Running,Body fluids,Sports science,Physiology,Biochemistry",Japan,All relevant data are within the paper.,Method,Yes,No,N/A,N/A,N/A,N/A,Method,Yes,No,N/A,No,NA,NA,NA,NA
11/09/2019,2019,10.1371/journal.pone.0221134,"Habits,Neuroscience,Tomography,Diagnostic medicine,Imaging techniques,Chronic obstructive pulmonary disease,Oncology,Diagnostic radiology,Population metrics,Biology and life sciences,Medicine and health sciences,Outpatients,Death rates,Social sciences,Pulmonary imaging,Smoking habits,Computed axial tomography,Lung and intrathoracic tumors,Psychology,Behavior,Pulmonology,Cancers and neoplasms,Research and analysis methods,Population biology,Radiology and imaging,Health care,Neuroimaging,Cancer detection and diagnosis,Patients",Spain,"The public sharing of the data underlying this study has been restricted by the University Miguel Hernandez Ethical Committee as the data contain potentially sensitive participant information. Requests for access to the data may be directed to the head of the Responsible Research Office, Alberto Pastor Campos (albertopastor@umh.es).",Method,Yes,No,N/A,N/A,N/A,N/A,N/A,No,No,N/A,No,NA,NA,NA,NA
23/04/2020,2020,10.1371/journal.pone.0231962,"Blood vessels,Animal studies,Cellular types,Proteins,Desmin,Medicine and health sciences,Cardiovascular anatomy,Anatomy,Cell biology,Endocrinology,Capillaries,Diabetes mellitus,Metabolic disorders,Mouse models,Biology and life sciences,Developmental biology,Physiological processes,Biochemistry,Angiogenesis,Animal models,Vascular permeability,Experimental organism systems,Physiology,Model organisms,Animal cells,Cytoskeletal proteins,Wound healing,Research and analysis methods,Tissue repair,Endocrine disorders,Vascular medicine,Pericytes,Cardiovascular physiology",United States of America,All relevant data are available at https://doi.org/10.6084/m9.figshare.11553306.v1,Method,Yes,Yes,Online,"https://doi.org/10.6084/m9.figshare.11553306.v1, 10.6084/m9.figshare.11553306.v1",N/A,figshare,Method,Yes,No,N/A,No,NA,NA,NA,NA
07/10/2019,2019,10.1371/journal.pcbi.1006993,"Legs,Physics,Medicine and health sciences,Gait analysis,Skeletal joints,Walking,Biology and life sciences,Body limbs,Physical sciences,Ankles,Hip,Physiology,Classical mechanics,Kinematics,Simulation and modeling,Biological locomotion,Research and analysis methods,Pelvis,Knee joints,Anatomy,Musculoskeletal system",United States of America,All simulation results files are available from https://simtk.org/projects/pfdeficitsgait.,Method,Yes,Yes,Online,https://simtk.org/projects/pfdeficitsgait,N/A,N/A,DA|Method|Supplementary,Yes,Yes,Online,Yes,10.1101/597294,02/04/2019,http://dx.doi.org/10.1101/597294,bioRxiv
31/03/2022,2022,10.1371/journal.pone.0265536,"Physical sciences,Medicine and health sciences,Geography,Manganese,Heavy metals,Low and middle income countries,Morphogenesis,Pathology and laboratory medicine,Economics,Biology and life sciences,Toxicology,Arsenic,Cadmium,Developmental biology,Social sciences,Chemistry,Metallic mercury,Chemical elements,Toxins,Toxic agents,Economic geography,Metallic lead,Earth sciences,Neurodevelopment",United States of America,All relevant data are within the paper and its supporting information files.,Method,Yes,No,N/A,N/A,N/A,N/A,N/A,No,No,N/A,No,NA,NA,NA,NA
13/05/2019,2019,10.1371/journal.pbio.3000260,"Nuclear physics,Electrostatics,Protons,Biochemistry,Crystal structure,Physics,Organic compounds,Chemistry,Neurotransmitters,Liposomes,Solid state physics,Vesicles,Chemical precipitation,Neuroscience,Monosaccharides,Organic chemistry,Crystallization,Glutamate,Cell biology,Physical sciences,Nucleons,Biology and life sciences,Chemical compounds,Electricity,Chemical reactions,Carbohydrates,Crystallography,Condensed matter physics,Sialic acids,Neurochemistry,Physical chemistry,Chemical bonding,Cellular structures and organelles,Hydrogen bonding",United States of America,"Relevant data are within the paper and its Supporting Information files. X-ray data for two structures reported has been deposited to the Protein Data Bank under accession codes 6E9N, 6E9O.",Method,Yes,Yes,Supplementary Information,N/A,N/A,N/A,DA|Method,Yes,No,N/A,No,NA,NA,NA,NA
06/10/2020,2020,10.1371/journal.pone.0239200,"Density functional theory,Condensed matter physics,Materials,Physics,Classical mechanics,Oxygen,Computational chemistry,Chemical elements,Quantum mechanics,Physical sciences,Vibration,Crystal structure,Molecular structure,Crystals,Dihedral angles,Crystallography,Geometry,Single crystals,Chemistry,Hydrogen bonding,Chemical physics,Physical chemistry,Materials science,Solid state physics,Chemical bonding,Mathematics",Egypt,Crystalâ€™s coordinates have been published in CCDC (Cambridge Structural Database) (https://www.ccdc.cam.ac.uk/) as CCDC 2000146.,Fulltext,Yes,Yes,Supplementary Information|Online,https://www.ccdc.cam.ac.uk/,N/A,N/A,N/A,No,No,N/A,No,NA,NA,NA,NA
26/08/2021,2021,10.1371/journal.pone.0256761,"Invertebrates,Geology,Fresh water,Eukaryota,Geologic time,Holocene epoch,Ecology and environmental sciences,Pleistocene epoch,Aquatic environments,Gastropods,Oceanography,Marine environments,Organisms,Marine and aquatic sciences,Cenozoic era,Paleontology,Freshwater environments,Malacology,Earth sciences,Mangrove swamps,Coasts,Zoology,Animals,Paleooceanography,Biology and life sciences,Quaternary period,Molluscs",Germany,All relevant data are within the paper and its Supporting Information files.,Method,Yes,Yes,Supplementary Information,N/A,N/A,N/A,Method,Yes,No,N/A,No,NA,NA,NA,NA
17/06/2021,2021,10.1371/journal.pone.0251200,"Bioassays and physiological analysis,Cell biology,Pathology and laboratory medicine,Enzyme assays,Signs and symptoms,MTT assay,Apoptosis,Cell death,Cell physiology,Fluorides,Colorimetric assays,Ecology and environmental sciences,Cell metabolism,Biochemical analysis,Toxicology,Cell processes,Chemistry,Medicine and health sciences,Central nervous system,Nervous system,Research and analysis methods,Chemical compounds,Necrosis,Clinical medicine,Anatomy,Natural resources,Biology and life sciences,Water resources,Toxicity,Physical sciences",Brazil,All relevant data are within the manuscript and its Supporting Information files.,Method,Yes,No,N/A,N/A,N/A,N/A,N/A,No,No,N/A,No,NA,NA,NA,NA
22/05/2020,2020,10.1371/journal.pone.0233414,"Transcranial direct-current stimulation,Cognitive psychology,Behavioral addiction,Smoking habits,Cognitive science,Brain electrophysiology,Behavior,Surgical and invasive medical procedures,Research and analysis methods,Habits,Brain mapping,Physiology,Electrophysiological techniques,Neuroscience,Sensory perception,Electrophysiology,Anatomy,Motivation,Functional electrical stimulation,Addiction,Social sciences,Psychology,Transcranial stimulation,Neurophysiology,Prefrontal cortex,Biology and life sciences,Brain,Medicine and health sciences,Bioassays and physiological analysis",The Netherlands,All relevant data are within the manuscript and its Supporting Information files.,Method,Yes,Yes,Supplementary Information,N/A,N/A,N/A,Method,Yes,No,N/A,No,NA,NA,NA,NA
17/06/2021,2021,10.1371/journal.pone.0253057,"Research and analysis methods,Medicine and health sciences,Probability theory,Simulation and modeling,Clinical medicine,Machine learning,Machine learning algorithms,Bayes theorem,Cognitive science,Cognition,Physics,Clinical trials,Randomized controlled trials,Cognitive psychology,Applied mathematics,Decision making,Computer and information sciences,Neuroscience,Physical sciences,Psychology,Adverse reactions,Biology and life sciences,Drug research and development,Artificial intelligence,Mathematics,Social sciences,Thermodynamics,Algorithms,Pharmacology",Italy,"The data that support the findings of this study are available via open access in Frontiers in Pharmacology at doi: 10.3389/fphar.2019.01317, reference number 10:1317.",Method,Yes,Yes,Supplementary Information|Online,10.3389/fphar.2019.01317,N/A,N/A,Method,Yes,No,N/A,No,NA,NA,NA,NA
26/12/2019,2019,10.1371/journal.pone.0226869,"Cytotoxic T cells,Cellular types,Medicine and health sciences,Cell biology,White blood cells,Immune cells,Oncology,T cells,Biology and life sciences,Developmental biology,Cancers and neoplasms,Cell differentiation,Immunology,Blood cells,Animal cells,Cancer immunotherapy,Immune response,Clinical immunology,Melanomas,Cancer treatment,Immunotherapy,Cell cycle and cell division,Clinical medicine,Cell processes",Israel,All relevant data are within the paper and its Supporting Information files.,Method,Yes,No,N/A,N/A,N/A,N/A,Method,Yes,No,N/A,No,NA,NA,NA,NA
19/03/2019,2019,10.1371/journal.pone.0214063,"Molecular biology,Vertebrates,Embryology,Neural tube defects,Research and analysis methods,Molecular probe techniques,Biology and life sciences,Organogenesis,In situ hybridization,Genetics,Experimental organism systems,Phenotypes,Zebrafish,Model organisms,Embryos,Molecular biology techniques,Developmental biology,Medicine and health sciences,Birth defects,Somites,Congenital disorders,Animal studies,Mesoderm,Animals,Eukaryota,Animal models,Fish,Osteichthyes,Morphogenesis,Organism development,Organisms,Probe hybridization",France,All relevant data are within the manuscript and its Supporting Information files.,Method,Yes,No,N/A,N/A,N/A,N/A,N/A,No,No,N/A,Yes,10.1101/435321,04/10/2018,http://dx.doi.org/10.1101/435321,bioRxiv
06/10/2020,2020,10.1371/journal.ppat.1008904,"Chemistry,Gene expression,Gene prediction,Chemical compounds,Genetics,Genome analysis,Leptospira interrogans,RNA,Microbial pathogens,Bacteria,Physical sciences,Biochemistry,Biology and life sciences,Pathogens,Leptospira,Bacterial pathogens,Nucleic acids,Genomics,Oxides,Organisms,Peroxides,Computational biology,Non-coding RNA,Hydrogen peroxide,Microbiology,Medical microbiology,DNA,Operons,Medicine and health sciences,Pathology and laboratory medicine",France,RNA Sequencing data have been deposited at the NCBI Gene Expression Omnibus (GEO) under the accession number GSE140019 (http://www.ncbi.nlm.nih.gov/geo).,Method,Yes,Yes,Supplementary Information|Online,http://www.ncbi.nlm.nih.gov/geo,GSE140019,Gene Expression Omnibus,Method,Yes,No,N/A,Yes,10.1101/2020.04.03.015982,05/04/2020,http://dx.doi.org/10.1101/2020.04.03.015982,bioRxiv
16/12/2019,2019,10.1371/journal.pone.0225900,"Brain electrophysiology,Medicine and health sciences,Nervous system,Physiology,Membrane potential,Animal cells,Electrophysiology,Synapses,Neurons,Cellular types,Research and analysis methods,Data visualization,Clinical medicine,Neural networks,Neuroimaging,Anatomy,Simulation and modeling,Biology and life sciences,Neuroscience,Computer and information sciences,Electrophysiological techniques,Cell biology,Imaging techniques,Electroencephalography,Network analysis,Cellular neuroscience,Brain mapping,Neurophysiology,Bioassays and physiological analysis,Clinical neurophysiology",Germany,All documentation files for replication of the results figures are available from the public repository https://github.com/pyrates-neuroscience/PyRates/tree/master/documentation.,Fulltext,Yes,Yes,Online,"https://github.com/pyrates-neuroscience/PyRates, https://www.cbs.mpg.de/departments/neurophysics/software/pyrates, https://github.com/konstantinweise/pygpc, https://github.com/pyrates-neuroscience/PyRates/tree/master/documentation",N/A,Github,N/A,No,Yes,Online,Yes,10.1101/608067,14/04/2019,http://dx.doi.org/10.1101/608067,bioRxiv
31/12/2021,2021,10.1371/journal.pone.0252972,"People and places,Mammals,Zoology,Infectious disease control,Biology and life sciences,Communications,Medical conditions,Medicine and health sciences,Veterinary epidemiology,Population groupings,Amniotes,Geographical locations,Animals,Sociology,Veterinary diseases,Europe,Encyclopedias,Estonia,Vertebrates,Social sciences,Infectious diseases,Eukaryota,Domestic animals,Professions,European Union,Veterinary science,Agricultural workers,Online encyclopedias,Swine,Mass media,Organisms",Italy,All relevant data are within the paper and its Supporting information zip file.,Fulltext,Yes,Yes,Supplementary Information|Online,"https://cloud.google.com/bigquery, https://github.com/codelucas/newspaper, https://yandex.com/dev/translate/",N/A,"Github, cloud.google.com",N/A,No,No,N/A,Yes,10.1101/2021.05.27.445948,28/05/2021,http://dx.doi.org/10.1101/2021.05.27.445948,bioRxiv
09/05/2019,2019,10.1371/journal.pone.0216223,"Wildlife,Global positioning system,Eukaryota,Computer and information sciences,Ecology and environmental sciences,Navigation,Animal management,Research and analysis methods,Ecosystems,Terrestrial environments,Research design,Forests,Temperate forests,Organisms,Animal types,Animal performance,Data acquisition,Information technology,Ecology,Survey research,Questionnaires,Zoology,Agriculture,Data reduction,Animals,Biology and life sciences,Engineering and technology",Germany,All relevant data are within the manuscript and its Supporting Information files.,Method,Yes,Yes,Supplementary Information,N/A,N/A,N/A,Method|Supplementary,Yes,No,N/A,No,NA,NA,NA,NA
08/10/2021,2021,10.1371/journal.pone.0258346,"Social sciences,Nurses,Population groupings,Professions,Bipolar disorder,People and places,Health care,Epidemiology,Aggression,Medicine and health sciences,Patients,Diagnostic medicine,Psychology,Behavior,Medical risk factors,Health care providers,Medical personnel,Mood disorders,Pharmacology,Mental health and psychiatry,Schizophrenia,Inpatients,Drug interactions,Biology and life sciences",The Netherlands,"All relevant data are within the Supporting Information files (Supplement ""Data Set Review"").",Method,Yes,Yes,Supplementary Information,N/A,N/A,N/A,N/A,No,No,N/A,No,NA,NA,NA,NA
31/03/2021,2021,10.1371/journal.pone.0241727,"Blood,Knee joints,Biology and life sciences,Clinical medicine,Skeleton,Anatomy,Body fluids,Gait analysis,Ankle joints,Ankles,Medicine and health sciences,Hip,Pain,Body limbs,Walking,Biological locomotion,Physiology,Skeletal joints,Legs,Knees,Musculoskeletal system,Blood flow,Signs and symptoms,Pelvis",United States of America,"All relevant data are within the paper and its Supporting Information files. Any additional data may be requested from Sara Myers, samyers@unomaha.edu.",Method,Yes,No,N/A,N/A,N/A,N/A,Method,Yes,No,N/A,Yes,10.1101/2020.10.21.348433,22/10/2020,http://dx.doi.org/10.1101/2020.10.21.348433,bioRxiv
24/02/2021,2021,10.1371/journal.pone.0246888,"Anatomy,Social sciences,People and places,Archaeology,Europe,Medicine and health sciences,Research and analysis methods,Research facilities,Museum collections,Zoology,Animal sexual behavior,Psychology,Animal behavior,Physiology,Behavior,Geographical locations,Norway,Humerus,Osteology,Musculoskeletal system,Femur,Physiological parameters,Skeleton,Biology and life sciences",Norway,All relevant data are within the manuscript and its Supporting Information files.,Method,Yes,No,N/A,N/A,N/A,N/A,N/A,No,No,N/A,No,NA,NA,NA,NA
01/02/2019,2019,10.1371/journal.pone.0211143,"Health care,Social sciences,North America,Socioeconomic aspects of health,Medicine and health sciences,Geographical locations,Computer and information sciences,Social networks,Elderly,Network analysis,Neighborhoods,Survey research,Geography,Research design,Earth sciences,Human geography,Age groups,Geographic areas,Census,Public and occupational health,Canada,Research and analysis methods,People and places,Sociology,Urban areas,Population groupings,Social research",Canada,"The data used in this study come from the Canadian Longitudinal Study on Aging (CLSA). All interested researchers may apply for access to these data through CLSA, subject to review by the Data Access Committee, ethics approval, and signing of a data sharing agreement. Data are provided only once a data sharing agreement is in place between McMaster University (the custodian of the data) and the researchersâ€™ institution. For more information about data access, see https://www.clsa-elcv.ca/data-access. Applications are submitted to access@clsa-elcv.ca.",Method,Yes,Yes,Online,https://www.clsa-elcv.ca/data-access,N/A,N/A,Method,Yes,No,N/A,No,NA,NA,NA,NA
06/06/2022,2022,10.1371/journal.pgen.1009995,"Medicine and health sciences,Cytoskeleton,Arthropoda,Cellular structures and organelles,Chromosomes,Post-translational modification,Insects,Microtubules,Reproductive system,Animal cells,Cell biology,Chromosome structure and function,Animal models,Research and analysis methods,Atmospheric science,Invertebrates,Animal studies,Drosophila melanogaster,Organisms,Oocytes,Ova,Entomology,Germ cells,Model organisms,Microtubule-associated proteins,Biochemistry,Experimental organism systems,Aurora,Proteins,Drosophila,Centromeres,Biology and life sciences,Phosphorylation,Zoology,Animals,Atmospheric phenomena,Anatomy,Eukaryota,Chromosome biology,Cytoskeletal proteins,Ovaries,Earth sciences,Cellular types",United Kingdom,Raw mass spectrometry proteomics data were deposited to the ProteomeXchange Consortium (http://proteomecentral.proteomexchange.org) via the PRIDE partner repository with the dataset identifier PXD030445.,Method,Yes,Yes,Supplementary Information|Online,http://proteomecentral.proteomexchange.org,N/A,ProteomeXchange,Method|Supplementary,Yes,No,N/A,Yes,10.1101/2021.12.16.472885,16/12/2021,http://dx.doi.org/10.1101/2021.12.16.472885,bioRxiv
25/04/2022,2022,10.1371/journal.pone.0267600,"Honey bees,Nucleic acids,Sociology,Research and analysis methods,People and places,Geographical locations,Morphometry,North America,Central America,Hymenoptera,Organisms,Polymerase chain reaction,Population biology,Forms of DNA,Artificial gene amplification and extension,Bees,DNA,Eukaryota,Molecular biology,Imaging techniques,Entomology,Zoology,Invertebrates,Mitochondrial DNA,Social systems,Molecular biology techniques,Nicaragua,Evolutionary biology,Biology and life sciences,Insects,Biochemistry,Arthropoda,Social sciences,Genetics,Population genetics,Animals",Nicaragua,All relevant data are within the manuscript and its Supporting Information files.,Method,Yes,Yes,Supplementary Information,N/A,N/A,N/A,N/A,No,No,N/A,No,NA,NA,NA,NA
05/12/2019,2019,10.1371/journal.pone.0225661,"Psychological stress,Agricultural workers,Research and analysis methods,Database searching,Farms,Medicine and health sciences,Biology and life sciences,Suicide,Social sciences,Database and informatics methods,Depression,Population groupings,People and places,Agriculture,Mental health and psychiatry,Mood disorders,Psychology,Professions",Canada,All relevant data are within the article and its Supporting Information files.,Method,Yes,Yes,Supplementary Information,N/A,N/A,N/A,N/A,No,No,N/A,No,NA,NA,NA,NA
21/07/2022,2022,10.1371/journal.pone.0271447,"Geriatrics,Cognitive psychology,Vision,Eyes,Retinal disorders,Psychology,Medical conditions,Signs and symptoms,Hemorrhage,Visual acuity,Ocular system,Clinical medicine,Endocrine physiology,Neuroscience,Endocrinology,Sensory perception,Medicine and health sciences,Social sciences,Prognosis,Vitrectomy,Anatomy,Growth factors,Biology and life sciences,Diagnostic medicine,Perception,Surgical and invasive medical procedures,Macular degeneration,Retinal degeneration,Cognitive science,Head,Vascular medicine,Geriatric ophthalmology,Macular disorders,Ophthalmic procedures,Physiology,Eye diseases,Ophthalmology",Japan,All relevant data are within the article and its Supporting Information files.,Method,Yes,Yes,Supplementary Information,N/A,N/A,N/A,Method,Yes,No,N/A,No,NA,NA,NA,NA
22/07/2019,2019,10.1371/journal.pone.0219070,"Ecology and environmental sciences,Insects,Life cycles,Composite particles,Moths and butterflies,Physical sciences,Caterpillars,Plant science,Eukaryota,Animals,Separation processes,Plant cells,Plant cell biology,Plant anatomy,Particle physics,Research and analysis methods,Invertebrates,Leaves,Fractionation,Organisms,Arthropoda,Cellular types,Community ecology,Cellular structures and organelles,Atoms,Ants,Trophic interactions,Larvae,Physics,Isotopes,Ecology,Chloroplasts,Biology and life sciences,Hymenoptera,Cell biology,Developmental biology,Stable isotopes",United States of America,"All gene sequences generated by this study are available on Genbank (accession numbers MK263466-MK263477 and MK862031 -- MK862083). Stable isotope data, biom files, metadata, and R analysis code are available through Harvardâ€™s Dataverse (DOI: 10.7910/DVN/YCZ76H).",Method,Yes,Yes,Online,10.7910/DVN/YCZ76H,N/A,Harvard Dataverse,DA,Yes,Yes,Online,No,NA,NA,NA,NA
18/10/2019,2019,10.1371/journal.pbio.3000443,"Body weight,Metabolism,Anatomy,Biological tissue,Physiology,Biology and life sciences,Obesity,Medicine and health sciences,Lipid aggregates,Blood plasma,Body mass index,Adipose tissue,Lipid metabolism,Cholesterol,Physiological parameters,Blood,Lipids,Biochemistry,Body fluids",Germany,All FINRISK data discussed in the paper can be made available to established researchers by a written application to the FINRISK Executive Board. The application portal is located at https://thl.fi/fi/tutkimus-ja-kehittaminen/tutkimukset-ja-hankkeet/finriski-tutkimus/tietoa-tutkijoille. More information can be obtained through finriski@thl.fi. MDC-CC data discussed in the paper will be made available to readers based on a written application to the MDC-CC steering committee (info@med.lu.se).,Method,Yes,Yes,Supplementary Information|Online,"https://thl.fi/fi/tutkimus-ja-kehittaminen/tutkimukset-ja-hankkeet/finriski-tutkimus/tietoa-tutkijoille, http://www.swisslipids.org",N/A,N/A,Method|Supplementary,Yes,No,N/A,No,NA,NA,NA,NA
29/04/2020,2020,10.1371/journal.pone.0231838,"Spaceflight,Research and analysis methods,Medical microbiology,Head,Cloning,Ecology and environmental sciences,Microbiology,Astronomical sciences,Anatomy,Genomics,Saliva,Physiology,Space exploration,Microbiome,Shotgun sequencing,Microbial genomics,Ears,Ecological metrics,Metagenomics,Genetics,Body fluids,Species diversity,Organisms,Sequencing techniques,Physical sciences,Bacteria,Molecular biology,Molecular biology techniques,Ecology,DNA cloning,Biology and life sciences,Medicine and health sciences",United States of America,The metagenomic sequence data generated from the ISS surfaces in this study can be found under NCBI Sequence Read Archive (SRA) under the bio-project number PRJNA497280. The crewmember associated microbiome sequencing data cannot be shared publicly due to IRB. The Data is available in NASA Life Sciences Data Archive (LSDA) (https://lsda.jsc.nasa.gov/Dataset). All intermediate data processing and analysis files are included as supplementary files.,Method,Yes,Yes,Supplementary Information|Online,https://lsda.jsc.nasa.gov/Dataset,PRJNA497280,NCBI Bioproject,Method,Yes,No,N/A,No,NA,NA,NA,NA
17/12/2021,2021,10.1371/journal.pone.0261265,"Muscle analysis,Social sciences,Biology and life sciences,Physical fitness,Strength training,Recreation,Physical activity,Sports and exercise medicine,Public and occupational health,Physiology,Legs,Psychology,Research and analysis methods,Exercise,Behavior,Sports,Sports science,Jumping,Bioassays and physiological analysis,Muscle contraction,Anatomy,Medicine and health sciences,Muscle physiology,Human performance,Body limbs,Biological locomotion",Poland,All relevant data are within the paper and its Supporting Information files.,Method,Yes,Yes,Supplementary Information,N/A,N/A,N/A,Method,Yes,No,N/A,No,NA,NA,NA,NA
12/02/2020,2020,10.1371/journal.pone.0227212,"Anatomy,Cell signaling,Genome-wide association studies,Genome analysis,Animal management,Genetics,Genomics,Equines,Medicine and health sciences,Genomic signal processing,Horses,Animal husbandry,Cell biology,Animals,Mammals,Computational biology,Eukaryota,Molecular biology,Organisms,Vertebrates,Animal performance,Skeletal muscles,Agriculture,Muscles,Signal transduction,Biology and life sciences,Molecular genetics,Genetic loci,Human genetics,Musculoskeletal system,Amniotes",Ireland,"Due to the confidential nature of the privately owned horses, data are available on request from the UCD Technology Transfer Office and Plusvital Ltd. for researchers who meet the criteria for access to confidential data. Data requests can be sent to UCD: Dr Stacey Kelly, Case Manager, Knowledge Transfer, Agriculture, Food and Veterinary Science, T: +353 1 716 3705, E: stacey.kelly@ucd.ie. Plusvital: Mike Shelly, CEO, T: +353 1 235001, E: Mike.Shelly@plusvital.com.",Method,Yes,Yes,Supplementary Information,N/A,N/A,N/A,Method,Yes,No,N/A,No,NA,NA,NA,NA
26/05/2020,2020,10.1371/journal.pgen.1008749,"Research and analysis methods,Landforms,People and places,DNA,Evolutionary biology,Biochemistry,Geomorphology,Oceania,Genomics,Chromatin modification,Asia,Geographical locations,Population genetics,Epigenetics,Indonesia,Molecular biology techniques,Evolutionary processes,Nucleic acids,Introgression,Topography,Islands,Gene expression,Molecular biology,DNA modification,Cell biology,Biology and life sciences,Earth sciences,Population biology,Genetics,Chromosome biology,Chromatin,DNA methylation,RNA sequencing,Sequencing techniques,Genomic medicine",United States of America,"All RNA sequencing reads and Illumina Epic iDat files are available through the Data Access Committee of the official data repository at the European Genome-phenome Archive (EGA; https://ega-archive.org/). The RNA sequencing data are deposited in study EGAS00001003671 and the methylation data are deposited in study EGAS00001003653. Access to raw reads and idats is contingent on compliance with existing Indonesian legislation and privacy regulations. Matrices of unfiltered read counts (doi: 10.26188/5d12023f77da8) and methylation M-values (doi: 10.26188/5d13fb401e305) for all samples, including replicates, are freely available on figshare (https://figshare.com). Differential expression (doi: 10.26188/5e009ef78ccd9) and methylation (10.26188/5e00abd72f581) testing results are freely available on figshare.",Method,Yes,Yes,Supplementary Information|Online,"10.26188/5d13fb401e305, 10.26188/5e009ef78ccd9, 10.26188/5d12023f77da8, 10.26188/5e00abd72f581, https://ega-archive.org/, https://figshare.com",N/A,"The European Genome-phenome Archive, figshare",Method,Yes,No,N/A,Yes,10.1101/704304,16/07/2019,http://dx.doi.org/10.1101/704304,bioRxiv
14/06/2019,2019,10.1371/journal.pone.0208292,"Principal component analysis,Roads,Medicine and health sciences,Asia,Hygiene,Statistics,Zoonoses,Research and analysis methods,Animal husbandry,Biology and life sciences,Infectious diseases,Civil engineering,Engineering and technology,China,Epidemiology,Tropical diseases,Physical sciences,Mathematics,Public and occupational health,Brucellosis,Mathematical and statistical techniques,People and places,Bacterial diseases,Transportation,Highways,Multivariate analysis,Neglected tropical diseases,Transportation infrastructure,Statistical methods,Animal management,Agriculture,Geographical locations",China,"All relevant data are available from the following websites: China Public Health Statistical Yearbook (http://www.nhc.gov.cn/zwgkzt/tjnj/list.shtml) and the China National Knowledge Infrastructure (CNKI) website, and the China Statistical Yearbook (http://www.stats.gov.cn/tjsj/ndsj/).",Method,Yes,Yes,Online,"http://www.stats.gov.cn/tjsj/ndsj/, http://www.nhc.gov.cn/zwgkzt/tjnj/list.shtml",N/A,National Bureau of Statistics of China,Method,Yes,No,N/A,Yes,10.1101/472340,16/11/2018,http://dx.doi.org/10.1101/472340,bioRxiv
17/06/2021,2021,10.1371/journal.pmed.1003621,"Depression,Social sciences,Geographical locations,Mood disorders,Neuroscience,Psychological and psychosocial issues,Cognitive science,Mental health and psychiatry,Cognitive psychology,People and places,Nepal,Health care,Psychology,Epidemiology,Mental health therapies,Psychometrics,Medical risk factors,Biology and life sciences,Medicine and health sciences,Clinical psychology,Asia",United States of America,Data are available through Duke University Research Data Repository https://doi.org/10.7924/r4gh9jq3g.,Method,Yes,Yes,Online,"https://doi.org/10.7924/r4gh9jq3g, 10.7924/r4gh9jq3g",N/A,N/A,N/A,No,No,N/A,No,NA,NA,NA,NA
19/01/2022,2022,10.1371/journal.pgph.0000028,"Social sciences,Medical conditions,Infectious diseases,Research design,Psychology,Survey research,Perception,Epidemiology,Research and analysis methods,Signs and symptoms,Clinical medicine,Biology and life sciences,Physiology,Surveys,Sensory perception,Cognitive psychology,Public and occupational health,Viral diseases,Virus testing,Coughing,Fevers,Diagnostic medicine,Physiological processes,COVID 19,Neuroscience,Cognitive science,Smell,Medicine and health sciences,Medical risk factors",United States of America,"Zoe Platform data used in this study is available to researchers through UK Health Data Research using the following link: https://web.www.healthdatagateway.org/dataset/fddcb382-3051-4394-8436-b92295f14259 Requests for UMD Global CTIS data may be completed through: https://dataforgood.fb.com/docs/covid-19-symptom-survey-request-for-data-access/ Exemption request: UMD Global CTIS data cannot be make publicly available by the investigators of this study for ethical and legal reasons. UMD Global CTIS data were made available to the investigators via a Data Use Agreement, and thus we do not have the authority to deposit the data into a public repository. This would violate our DUA with UMD Global CTIS. Additionally, raw data with or without survey weights could be used to identify participants, which would compromise participant privacy. Academic and non-profit researchers may request access to the raw data via the mechanism provided, in part to ensure that researchers will ensure confidentiality of raw data. Similarly, the Zoe participant data access is protected via the Health Data Gateway. The Covid Symptom Study dataset is hosted by Health Data Research UK through the (https://healthdatagateway.org) (HDG), by searching for ""COVID-19 Symptom Tracker Dataset"". Access to the data is applied for via a two-stage process through HDG. The dataset is accessed via a protected environment provisioned by HDG for successful applicants.â€",Method,Yes,Yes,Online,"https://healthdatagateway.org, https://web.www.healthdatagateway.org/dataset/fddcb382-3051-4394-8436-b92295f14259, https://dataforgood.fb.com/docs/covid-19-symptom-survey-request-for-data-access/",N/A,N/A,Method,Yes,No,N/A,Yes,10.1101/2021.03.16.21253719,17/03/2021,http://dx.doi.org/10.1101/2021.03.16.21253719,medRxiv
10/03/2022,2022,10.1371/journal.pone.0265235,"Pharmaceutics,Liver diseases,Cancer treatment,Serine proteases,Research and analysis methods,Chemical compounds,Prospective studies,Research design,Enzymology,Enzymes,Cancers and neoplasms,Biochemistry,Carcinoma,Medicine and health sciences,Vitamin K,Chemistry,Proteins,Organic compounds,Oncology,Vitamins,Proteases,Cancer detection and diagnosis,Organic chemistry,Gastrointestinal tumors,Diagnostic medicine,B vitamins,Physical sciences,Drug therapy,Biology and life sciences,Hepatocellular carcinoma,Prognosis,Gastroenterology and hepatology",Japan,All relevant data are within the manuscript.,Method,Yes,No,N/A,N/A,N/A,N/A,Method,Yes,No,N/A,No,NA,NA,NA,NA
15/07/2019,2019,10.1371/journal.pone.0219549,"Clinical oncology,Vascular surgery,Red blood cells,Cell biology,Population metrics,Cancer treatment,Biology and life sciences,Nutrition,Prognosis,Surgical and invasive medical procedures,Death rates,Malnutrition,Animal cells,Body weight,Physiological parameters,Oncology,Physiology,Medicine and health sciences,Surgical oncology,Body mass index,Clinical medicine,Cardiovascular procedures,Blood cells,Diagnostic medicine,Population biology,Cellular types",Brazil,All relevant data are within the manuscript and Supporting Information files.,Method,Yes,Yes,Supplementary Information,N/A,N/A,N/A,N/A,No,No,N/A,No,NA,NA,NA,NA
03/11/2020,2020,10.1371/journal.pone.0241037,"Biology and life sciences,Genomics,Organic chemistry,Amniotes,Vertebrates,Genetics,Medical microbiology,Metabolites,Zoology,Mammals,Lipids,Microbiology,Chemistry,Eukaryota,Metabolism,Animals,Metabolomics,Microbial genomics,Organic compounds,Chemical compounds,Biochemistry,Food,Nutrition,Physical sciences,Carbohydrates,Diet,Medicine and health sciences,Organisms,Fatty acids,Cats,Microbiome,Starches",United States of America,Sequences were deposited in the NCBI Sequence Read Archive under accession number PRJNA63518. All other data are available in the paper and its Supporting Information files.,Method,Yes,Yes,Supplementary Information|Online,N/A,PRJNA63518,NCBI Bioproject,Method,Yes,No,N/A,No,NA,NA,NA,NA
18/03/2022,2022,10.1371/journal.pone.0265387,"Public and occupational health,Prostate cancer,Urology,Cancers and neoplasms,Epidemiology,Oncology,Genetic screens,Medicine and health sciences,Ovarian cancer,Breast cancer,Genetics,Biology and life sciences,Breast tumors,Medical risk factors,Behavioral and social aspects of health,Genetic causes of cancer,Cancer risk factors,Genitourinary tract tumors,Human genetics,Prostate diseases,Gene identification and analysis,Gynecological tumors",Switzerland,All relevant data are within the manuscript and its Supporting Information files.,Method,Yes,Yes,Supplementary Information,N/A,N/A,N/A,Method,Yes,No,N/A,No,NA,NA,NA,NA
22/04/2022,2022,10.1371/journal.pone.0260905,"Biology and life sciences,Natural selection,Evolutionary processes,Reproductive physiology,Bird eggs,Eggs,Earth sciences,Islands,Animal genetics,Bird genetics,Genetics,Geomorphology,Population size,DNA recombination,Population metrics,Nucleic acids,Topography,Landforms,Population biology,Physiology,Biochemistry,Reproductive success,Evolutionary biology,DNA",United Kingdom,All relevant data files are available from the Dryad repository (https://doi.org/10.5061/dryad.q83bk3jjw).,Method,Yes,Yes,Online,"https://doi.org/10.5061/dryad.q83bk3jjw, 10.5061/dryad.q83bk3jjw",N/A,Dryad Digital Repository,N/A,No,No,N/A,Yes,10.1101/2021.11.19.469339,20/11/2021,http://dx.doi.org/10.1101/2021.11.19.469339,bioRxiv
18/07/2019,2019,10.1371/journal.pone.0219858,"Crustaceans,People and places,Sea ice,Marine and aquatic sciences,Eukaryota,Norwegian people,Glaciology,Gears,Marine biology,Ethnicities,Agriculture,Geographical locations,European people,Animals,Arthropoda,Fisheries,Invertebrates,Fisheries science,Mechanical engineering,Europe,Norway,Crabs,Physiology,Earth sciences,Biology and life sciences,Engineering and technology,Climbing,Biological locomotion,Organisms,Population groupings,Medicine and health sciences",Norway,All relevant data are within the manuscript and its Supporting Information files.,Method,Yes,No,N/A,N/A,N/A,N/A,Method,Yes,No,N/A,No,NA,NA,NA,NA
10/09/2019,2019,10.1371/journal.pone.0222151,"Aerodynamics,Simulation and modeling,Wave interference,Engineering and technology,Pistons,Equipment,Dynamics,Field tests,Data visualization,Physical sciences,Waves,Research design,Mechanical engineering,Research and analysis methods,Classical mechanics,Schematic diagrams,Physics,Computer and information sciences",China,All relevant data are within the manuscript and its Supporting Information files.,Method,Yes,Yes,Supplementary Information,N/A,N/A,N/A,Method,Yes,No,N/A,No,NA,NA,NA,NA
15/05/2019,2019,10.1371/journal.pone.0216821,"Cancer treatment,Medicine and health sciences,People and places,Outpatients,Sociology,Leukemias,Social networks,Patients,Research and analysis methods,Oncology,Hematologic cancers and related disorders,Hematology,Research design,Population groupings,Cancers and neoplasms,Network analysis,Health care,Children,Families,Social sciences,Acute myeloid leukemia,Computer and information sciences,Age groups,Qualitative studies,Myeloid leukemia",Denmark,"In this study there is an ethical restriction on sharing a de-identified data set as the data may contain potentially identifying and sensitive information. The qualitative data for this study contains audio-files and transcribed text versions from interviews with cancer patients and spouses. Although all names have been altered and data has been de-identified, the transcribed versions may include information that potentially make them identifiable and thereby adversely disclose sensitive patient information. This restriction on data has been imposed by The Regional Scientific Ethical Committees for Southern Denmark in accordance to EU and Danish Law. You may contact The Regional Scientific Ethical Committees for Southern Denmark (S-20122000 86) (komite@rsyd.dk) in case of any question.",Method,Yes,No,N/A,N/A,N/A,N/A,Method,Yes,No,N/A,No,NA,NA,NA,NA
12/09/2019,2019,10.1371/journal.pone.0221899,"Immunohistochemistry techniques,Animal models,Pulmonary function,Immune response,Experimental organism systems,Diagnostic medicine,Imaging techniques,Chronic obstructive pulmonary disease,Diagnostic radiology,Medicine and health sciences,Biology and life sciences,Histochemistry and cytochemistry techniques,Specimen preparation and treatment,Mammals,Animal studies,Inflammation,Eukaryota,Staining,Pulmonary imaging,Immunologic techniques,Pathology and laboratory medicine,Immunology,Model organisms,Organisms,Signs and symptoms,Amniotes,Animals,Pulmonology,Cell staining,Research and analysis methods,Mice,Mouse models,Radiology and imaging,Rodents,Vertebrates",United Kingdom,All relevant data are within the paper and its Supporting Information files.,Method,Yes,No,N/A,N/A,N/A,N/A,N/A,No,No,N/A,No,NA,NA,NA,NA
30/06/2021,2021,10.1371/journal.pcbi.1009137,"Electrophysiology,Cardiology,Zoology,Mammals,Muscle cells,Engineering and technology,Eukaryota,Animal models,Vertebrates,Biological tissue,Research and analysis methods,Medicine and health sciences,Rectifiers,Electronics engineering,Electrophysiological techniques,Animals,Experimental organism systems,Pig models,Cardiomyocytes,Bioassays and physiological analysis,Cardiac pacing,Amniotes,Muscle tissue,Electronics,Anatomy,Biology and life sciences,Cell biology,Animal studies,Cellular types,Organisms,Swine,Physiology,Cardiac electrophysiology,Animal cells",France,All relevant data are within the manuscript and its Supporting Information files.,Method,Yes,Yes,Supplementary Information|Online,"www.openCARP.org, www.cellml.org, www.myokit.org",N/A,N/A,Method,Yes,No,N/A,No,NA,NA,NA,NA
13/04/2020,2020,10.1371/journal.pone.0231504,"Sociology,Research and analysis methods,Human learning,Research design,Surveys,Learning,Cognitive science,Cognitive psychology,Economics,Survey research,Computer and information sciences,Neuroscience,Behavior,Polynomials,Physical sciences,Algebra,Psychology,Biology and life sciences,Social networks,Learning and memory,Social research,Human capital,Network analysis,Mathematics,Social sciences",China,All relevant data are within the paper and its Supporting Information files.,Method,Yes,Yes,Supplementary Information,N/A,N/A,N/A,Method,Yes,No,N/A,No,NA,NA,NA,NA
20/12/2021,2021,10.1371/journal.pone.0261191,"Mucus,Carbohydrates,Monosaccharides,Medicine and health sciences,Biological cultures,Organic chemistry,Bioassays and physiological analysis,Proteins,Cell lines,Research and analysis methods,Gene expression,Physical sciences,Gastrointestinal tract,Organic compounds,Chemical compounds,Body fluids,Caco-2 cells,Anatomy,Biology and life sciences,Cell cycle and cell division,Cell biology,Biochemistry,Glucose,Digestive system,Genetics,Mucin,Physiology,Cell processes,Chemistry,Microarrays",The Netherlands,All microarray files are available from the NCBI GEO database (accession number GSE173729).,Method,Yes,Yes,Supplementary Information|Online,N/A,GSE173729,Gene Expression Omnibus,Method,Yes,No,N/A,No,NA,NA,NA,NA
16/06/2020,2020,10.1371/journal.pone.0234651,"Body fluids,Drug-drug interactions,Tuberculosis,Nurses,Bacterial diseases,Research and analysis methods,Research design,Professions,Health care providers,Adverse events,Sputum,Tropical diseases,Drug interactions,Medical personnel,People and places,Physiology,Medicine and health sciences,Biology and life sciences,Population groupings,Drug therapy,Extensively drug-resistant tuberculosis,Infectious diseases,Anatomy,Health care,Mucus,Clinical research design,Pharmacology,Pharmaceutics",India,"Data is coded and stored at MSF independent clinic .Mumbai. since the data is of patients with personal information, data cannot be shared publically due to patient confidentiality issues. Data are available on request in accordance with MSFâ€™s data sharing policy. Requests for access to data should be made to data.sharing@msf.org For more information please see: 1) MSFâ€™s Data Sharing Policy: http://fieldresearch.msf.org/msf/handle/10144/306501 2) MSFâ€™s Data Sharing Policy PLOS Medicine article: http://journals.plos.org/plosmedicine/article?id=10.1371/journal.pmed.1001562.",Method,Yes,Yes,Online,"http://fieldresearch.msf.org/msf/handle/10144/306501, 10.1371/journal.pmed.1001562, http://journals.plos.org/plosmedicine/article?id=10.1371/journal.pmed.1001562",N/A,N/A,Method,Yes,No,N/A,No,NA,NA,NA,NA
01/09/2021,2021,10.1371/journal.pone.0256896,"Staphylococcal infection,Medicine and health sciences,Sneezing,Pathogens,Microbial pathogens,Research design,Medical risk factors,Bacterial pathogens,Biology and life sciences,Public and occupational health,Coughing,Medical microbiology,Clinical medicine,Signs and symptoms,Hygiene,Physiology,Questionnaires,Microbiology,Bacterial diseases,Pathology and laboratory medicine,Physiological processes,Diet,Staphylococcal food poisoning,Epidemiology,Research and analysis methods,Medical conditions,Food,Nutrition,Infectious diseases,Survey research",Malaysia,All relevant data are within the manuscript.,Method,Yes,No,N/A,N/A,N/A,N/A,N/A,No,No,N/A,No,NA,NA,NA,NA
14/01/2021,2021,10.1371/journal.pone.0244109,"Africa,Kenya,Labor and delivery,Women's health,Death rates,Obstetrics and gynecology,Health statistics,Geographical locations,Nigeria,Neonatal care,Pediatrics,Families,Morbidity,People and places,Age groups,Medicine and health sciences,Biology and life sciences,Children,Maternal health,Population metrics,Population biology,Neonates,Birth,Health care,Neonatology,Developmental biology,Population groupings,Infants",United Kingdom,All relevant data are within the manuscript and its Supporting Information file.,Method,Yes,Yes,Supplementary Information,N/A,N/A,N/A,N/A,No,No,N/A,No,NA,NA,NA,NA
29/04/2020,2020,10.1371/journal.pone.0231931,"Behavioral and social aspects of health,Pollution,Cognitive psychology,Psychology,Engineering and technology,Decision making,Physical sciences,Materials,Materials science,Energy and power,Neuroscience,Health care,Air pollution,Fuels,Medicine and health sciences,Survey research,Surveys,Social sciences,Biology and life sciences,Research design,Research and analysis methods,Ecology and environmental sciences,Public and occupational health,Finance,Asia,Cognitive science,India,Health education and awareness,People and places,Economics,Geographical locations,Cognition",Switzerland,The dataset and code required to replicate the study findings presented in this article are provided as Supporting Information in S6 Appendix.,Fulltext,Yes,Yes,Supplementary Information,N/A,N/A,N/A,DA|Supplementary,Yes,Yes,Supplementary Information,No,NA,NA,NA,NA
06/10/2021,2021,10.1371/journal.pcbi.1009470,"Biochemistry,Organic chemistry,Sialic acids,Carbohydrates,Chemical bonding,Chemistry,Physical chemistry,Aliphatic amino acids,Organic compounds,Valine,Research and analysis methods,Chemical compounds,Forecasting,Mathematical and statistical techniques,Monosaccharides,Mathematics,Biology and life sciences,Physical sciences,Amino acids,Hydrogen bonding,Statistical methods,Proteins,Statistics,Protein interactions,Lectins,Mannose",United States of America,"The GitHub repository https://github.com/demattox/lec_gly_binding contains the scripts used to perform the statistical and predictive analyses presented here, along with the combined UniLectin3D information and featurized representations of the lectin-glycan interactions used in these analyses. The processed data are also provided in the supplemental information. These files were created from publicly available PDB files, listed in the supplementary information, using open-source software and the scripts found in this GitHub repository. The necessary steps to repeat this analysis are outlined in the repository. By request of the original author of code to generate the 3DZDs, we are unable to distribute the original source code or our modifications at this time. However, the compiled binary used to calculate the 3DZDs is available in the main repository and can be used to fully recreate the feature generation process. The modified version of the PLIP tool used is available at https://github.com/demattox/plip.",Method,Yes,Yes,Supplementary Information|Online,"https://github.com/demattox/plip, https://github.com/demattox/lec_gly_binding",N/A,Github,DA|Method,Yes,Yes,Online,Yes,10.1101/2021.06.14.448374,15/06/2021,http://dx.doi.org/10.1101/2021.06.14.448374,bioRxiv
26/09/2019,2019,10.1371/journal.pone.0218591,"Materials,Physical sciences,Anthropology,Archaeological excavation,Europe,Earth sciences,Hominids,Archaic humans,Pleistocene epoch,Cenozoic era,Hominins,Geographical locations,Materials science,Paleoanthropology,Biology and life sciences,Limestone,Geologic time,Minerals,Quaternary period,Archaeology,Physical anthropology,People and places,Paleontology,Geology,Raw materials,Social sciences,Mineralogy",France,"The materials analyzed in the study are stored in at the Venosa Museum (Basilicata region, Italy) and in situ on the Notarchirico site. The specific materials analyzed in this study are described in detail in the Materials and Methods section. Qualified, interested may submit queries related to access to the Soprintendenza of Basilicata (Italy, email = sabap-bas.archeopz@beniculturali.it). The authors do not have special access privileges to these materials and accessed them in the manner described.",Method,Yes,No,N/A,N/A,N/A,N/A,N/A,No,No,N/A,No,NA,NA,NA,NA
20/08/2020,2020,10.1371/journal.pone.0237769,"Body weight,Infectious diseases,Research design,Public and occupational health,Pulmonology,Physiological parameters,Medicine and health sciences,Pulmonary function,Nutrition,Diet,Respiratory infections,Respiratory disorders,Computer and information sciences,Data management,Research and analysis methods,Biology and life sciences,Physical activity,Medical conditions,Physiology,Longitudinal studies",Spain,"The data used in this analysis contain sensitive and identifying personal information from participants in multiple centers across Europe. The participants of the ECRHS study did not provide consent that their data be made public and permission to do so has not been granted by all relevant center-based ethical committees. ECRHS has a data sharing policy and will make the data available upon request to qualified researchers working within institutions with evidence that they comply with current GDPR ethical and professional standards and requirements if all local participating centers are able to gain relevant permissions (contact via ECRHS data manager (James Potts, j.potts@imperial.ac.uk) and program manager (Sabrina Kapur, sabrina.kapur@imperial.ac.uk); Professor Debbie Jarvis, d.jarvis@imperial.ac.uk, or any member of the ECRHS Steering Committee, www.ecrhs.org/steering.htm, i.e. Professor Cecilie Svanes, cecilie.svanes@uib.no).",Method,Yes,Yes,Online,www.ecrhs.org/steering.htm,N/A,N/A,N/A,No,Yes,Online,No,NA,NA,NA,NA
21/07/2020,2020,10.1371/journal.pbio.3000782,"Animal studies,Proteins,Organisms,Eukaryota,Brassica,RNA,Plant and algal models,Light microscopy,Biology and life sciences,Biochemistry,Luminescent proteins,Confocal microscopy,Recombinant proteins,RNA splicing,Arabidopsis thaliana,Fluorescence recovery after photobleaching,Scanning confocal microscopy,Experimental organism systems,Model organisms,Microscopy,RNA processing,Research and analysis methods,Messenger RNA,Seedlings,Plants,Nucleic acids,Green fluorescent protein,Gene expression,Genetics",China,All relevant data are within the paper and its Supporting Information files. RNA-seq data have been deposited at BioProject (https://www.ncbi.nlm.nih.gov/bioproject/) under the accession number PRJNA653772.,Method,Yes,Yes,Supplementary Information|Online,https://www.ncbi.nlm.nih.gov/bioproject/,PRJNA653772,NCBI Bioproject,N/A,No,No,N/A,No,NA,NA,NA,NA
31/03/2022,2022,10.1371/journal.pone.0266298,"Clinical genetics,Molecular biology assays and analysis techniques,Gene expression and vector techniques,Cancer treatment,Drug therapy,Medicine and health sciences,Signal transduction,Molecular biology techniques,Pharmacology,Research and analysis methods,Stem cell therapy,Molecular biology,Drug research and development,Cell processes,Cell death,Cell biology,Cancers and neoplasms,Pharmaceutics,Oncology,Hematologic cancers and related disorders,Protein expression,Hematology,Cell signaling,Leukemia,Apoptosis,Biology and life sciences",United Kingdom,All relevant data are within the manuscript and its Supporting Information files.,Method,Yes,No,N/A,N/A,N/A,N/A,Method,Yes,No,N/A,No,NA,NA,NA,NA
13/07/2021,2021,10.1371/journal.pone.0254565,"Genitourinary tract tumors,Asia,Geographical locations,Naturopathy,Prostate diseases,Breast cancer,Nepal,Cancers and neoplasms,People and places,Prostate cancer,Breast tumors,Oncology,Lung and intrathoracic tumors,Diagnostic medicine,Urology,Cancer screening,Health care,Health education and awareness,Cancer detection and diagnosis,Complementary and alternative medicine,Medicine and health sciences",Nepal,All relevant data are within the manuscript and its Supporting information files.,Method,Yes,Yes,Supplementary Information,N/A,N/A,N/A,N/A,No,No,N/A,No,NA,NA,NA,NA
19/08/2021,2021,10.1371/journal.pone.0256354,"Transportation,Aerodynamics,Civil engineering,Materials science,Mathematics,Atmospheric science,Traffic safety,Earth sciences,Road traffic collisions,Roads,Tribology,Epidemiology,Physics,Transportation infrastructure,Wind,Safety,Medical risk factors,Snow,Mechanical engineering,Engineering and technology,Traumatic injury risk factors,Geometry,Dynamics,Meteorology,Classical mechanics,Physical sciences,Public and occupational health,Friction,Medicine and health sciences",China,All relevant data are within the manuscript.,Fulltext,Yes,No,N/A,N/A,N/A,N/A,N/A,No,No,N/A,No,NA,NA,NA,NA
08/04/2021,2021,10.1371/journal.pone.0249773,"Mathematical and statistical techniques,Haplotypes,Human genetics,Research and analysis methods,Statistical methods,Statistics,Genetic mapping,Geographical locations,Latin American people,Genomics,Genome analysis,North America,Human genomics,Heredity,Mathematics,Computer and information sciences,Mexican people,Principal component analysis,Mexico,Computational biology,Genetics,Physical sciences,Library science,People and places,Genome-wide association studies,Multivariate analysis,Biology and life sciences,Catalogs,Population groupings,Ethnicities",Mexico,"The JPVS, and subsets reported in Table 1 are available as supporting information. The datasets included are in VCF format, and cover every variant found, with the corresponding allele frequency in our studied population; it also includes spreadsheet for subsets of interest for easy exploration. In alignment with the respective Institutional Review Board approval and individual informed consents, any other BAM or VCF file will be available upon request to avoid compromising the participant's privacy. Please direct requests to Prof. GarbiÃ±e Saruwatari Zavala (gsaruwatari@inmegen.gob.mx), president of the Ethics Committee at Instituto Nacional de Medicina GenÃ³mica (INMEGEN).",Method,Yes,Yes,Supplementary Information,N/A,N/A,N/A,Method,Yes,No,N/A,No,NA,NA,NA,NA
23/12/2020,2020,10.1371/journal.pcbi.1008483,"Physical sciences,Statistical methods,Neuroscience,Research and analysis methods,Cognitive science,Sensory perception,Optimization,Normal distribution,Algorithms,Simulation and modeling,Cognition,Probability distribution,Biology and life sciences,Decision making,Social sciences,Statistics,Applied mathematics,Mathematics,Maximum likelihood estimation,Statistical models,Probability theory,Mathematical and statistical techniques,Cognitive psychology,Perception,Psychology",United States of America,Code and data to generate the figures in the paper is available at https://github.com/basvanopheusden/ibs-development. The IBS toolbox for efficient and unbiased log-likelihood estimation is available at https://github.com/lacerbi/ibs.,Method,Yes,Yes,Online,"https://github.com/basvanopheusden/ibs-development, https://github.com/lacerbi/ibs",N/A,Github,DA|Method,Yes,Yes,Online,No,NA,NA,NA,NA
20/06/2019,2019,10.1371/journal.pone.0218590,"Data visualization,Computer and information sciences,Perception,Terrestrial environments,Physiological processes,Social sciences,Cognitive science,Biology and life sciences,Eating,Cognitive psychology,Physiology,Vision,Research and analysis methods,Sociology,Social communication,Sensory perception,Medicine and health sciences,Communications,Ecology and environmental sciences,Network analysis,Imaging techniques,Social media,Neuroscience,Urban environments,Psychology,Social networks",South Korea,All relevant data are available in the Figshare Repository at https://doi.org/10.6084/m9.figshare.7603907.v1.,Method,Yes,Yes,Online,"https://doi.org/10.6084/m9.figshare.7603907.v1, 10.6084/m9.figshare.7603907.v1",N/A,figshare,N/A,No,No,N/A,No,NA,NA,NA,NA
16/12/2021,2021,10.1371/journal.ppat.1010092,"Viral pathogens,Biochemistry,Amniotes,Animals,Macaque,Primates,Monkeys,SARS CoV 2,Public and occupational health,Clinical medicine,Physiology,Medical conditions,Infectious disease control,Mammals,Microbiology,Immune system proteins,SARS coronavirus,Signs and symptoms,Vertebrates,Immune response,Research and analysis methods,Rhabdoviruses,Immunologic techniques,Medical microbiology,Zoology,Infectious diseases,Viral vaccines,Pathology and laboratory medicine,Viruses,Enzyme-linked immunoassays,Inflammation,Medicine and health sciences,Biology and life sciences,Coronaviruses,Vaccine development,Preventive medicine,Vesicular stomatitis virus,Immune physiology,Pathogens,Eukaryota,Microbial pathogens,Virology,Immunology,Proteins,Old World monkeys,Immunoassays,Vaccination and immunization,Organisms,Antibodies,RNA viruses,Vaccines",Canada,All relevant data are within the manuscript and its Supporting Information files.,Method,Yes,Yes,Supplementary Information,N/A,N/A,N/A,N/A,No,Yes,Supplementary Information,No,NA,NA,NA,NA
22/05/2019,2019,10.1371/journal.pone.0216803,"Age groups,People and places,Mothers,Public and occupational health,Cognition,Education,Biology and life sciences,Socioeconomic aspects of health,Health care,Sociology,Population groupings,Schools,Professions,Teachers,Medicine and health sciences,Adolescents,Neuroscience,Families,Social sciences,Educational attainment,Children,Cognitive science",The Netherlands,"The data underlying the findings presented in this paper are available on request. Requests can be submitted to the PIAMA Principal Investigators. Their names and e-mail addresses are listed on the PIAMA website (http://piama.iras.uu.nl/english). The PIAMA data are not freely accessible in the public domain, because this would be in conflict with the agreement between the PIAMA study team and the PIAMA participants. The information participants received at the start of the study (in 1996-1997) included the statement 'the information that we receive from you will only be used for the PIAMA project' and participants gave written informed consent based on this information.",Method,Yes,Yes,Supplementary Information|Online,http://piama.iras.uu.nl/english,N/A,N/A,N/A,No,No,N/A,No,NA,NA,NA,NA
23/03/2021,2021,10.1371/journal.pone.0248851,"Biology and life sciences,Optic disc,Social sciences,Damage mechanics,Sensory perception,Biomarkers,Blood,Physiology,Blood vessels,Anatomy,Vision,Physics,Cardiovascular anatomy,Arteries,Biochemistry,Cognitive science,Classical mechanics,Ocular anatomy,Glaucoma,Deformation,Cognitive psychology,Blood flow,Physical sciences,Ophthalmology,Eye diseases,Perception,Neuroscience,Medicine and health sciences,Medical conditions,Ocular system,Psychology,Eyes,Head,Body fluids",Poland,All relevant data are within the paper and its Supporting Information files.,Method,Yes,Yes,Supplementary Information,N/A,N/A,N/A,Method,Yes,No,N/A,No,NA,NA,NA,NA
07/02/2019,2019,10.1371/journal.pone.0211933,"Social psychology,People and places,Biology and life sciences,Sociology,Social sciences,Psychology,Sports science,Recreation,Aggression,Prosocial behavior,Cognitive science,Research design,Families,Survey research,Questionnaires,Population groupings,Education,Cognitive psychology,Applied mathematics,Neuroscience,Research and analysis methods,Mathematics,Physical sciences,Social cognition,Behavior,Age groups,Algorithms,Simulation and modeling,Clustering algorithms,Adolescents,Children,Schools,Sports",Spain,All relevant data are within the paper and its Supporting Information files.,Method,Yes,Yes,Supplementary Information,N/A,N/A,N/A,N/A,No,No,N/A,No,NA,NA,NA,NA
14/04/2020,2020,10.1371/journal.pone.0230947,"Obstetrics and gynecology,Computer and information sciences,Pregnancy,Psychology,Pregnancy complications,Emotions,Birth,Internet,Miscarriage,Biology and life sciences,Research and analysis methods,Social sciences,Labor and delivery,Women's health,Medicine and health sciences,Information retrieval,Maternal health,Computer networks,Database and informatics methods",United States of America,"Due to the Terms of Use of the health forum we used (https://www.whattoexpect.com/terms-of-use/) explicitly prohibiting reproduction or redistribution of materials made available on their platform, we cannot make the dataset of user posts directly available. However, the processed data (the topics resulting from the algorithm described), detailed per-topic statistics, and code used to compute the topic model--along with specific instructions on how to recreate our dataset--are now available at https://healthlanguageprocessing.org/pregnancy-forums/.",Method,Yes,Yes,Supplementary Information|Online,"https://www.whattoexpect.com/terms-of-use/, https://healthlanguageprocessing.org/pregnancy-forums/",N/A,N/A,DA|Method,Yes,Yes,Online,No,NA,NA,NA,NA
21/06/2019,2019,10.1371/journal.pone.0213231,"Landforms,Zoology,Amniotes,Animal navigation,Islands,Geomorphology,Biology and life sciences,Turtles,Oceans,Bodies of water,Social sciences,Eukaryota,Organisms,Foraging,Behavior,Psychology,Animals,Earth sciences,Animal migration,Topography,Reptiles,Marine and aquatic sciences,Animal behavior,Vertebrates,Testudines,Beaches",United States of America,All relevant data are within the manuscript and its Supporting Information files.,Method,Yes,Yes,Supplementary Information,N/A,N/A,N/A,Method,Yes,No,N/A,Yes,10.1101/556191,20/02/2019,http://dx.doi.org/10.1101/556191,bioRxiv
28/06/2022,2022,10.1371/journal.pone.0269434,"Alleles,Genetics,Human genetics,Genome analysis,Geographical locations,Ethnicities,Slavic people,Variant genotypes,Population groupings,Molecular biology techniques,Genome sequencing,Human genomics,Genetic mapping,Research and analysis methods,Genetic loci,Heredity,Biology and life sciences,Data processing,Europe,Data management,Molecular biology,European people,People and places,Sequencing techniques,Genomics,Computational biology,Computer and information sciences,Russian people,Genome-wide association studies",United States of America,"The underlying raw study data comprises only sensitive data that cannot be made publicly available: genetic and biological data of human participants. The consent to the publication of the raw data was not obtained from the individuals, and the data set could pose a threat to confidentiality. The restriction is imposed by the Ethical Committee of the Almazov National Medical Research Center (protocol #243 from 11/12/2012, contacts: rotar@almazovcentre.ru). Genotyped and imputed by HRC allele frequencies for Russian cohort are available as supplementary files. All other data used in the article (including imputation reference panels and GWAS summary statistics) were not collected or owned by the authors. Thus, this data can be accessed through public resources. The authors did not have any special access privileges. Corresponding links to resources can be found in S1 Appendix.",Method,Yes,No,N/A,N/A,N/A,N/A,N/A,No,No,N/A,No,NA,NA,NA,NA
18/03/2019,2019,10.1371/journal.pone.0207047,"Plant communities,Eukaryota,Computer and information sciences,Data management,Legumes,Plant science,Biology and life sciences,Ecology,Wildfires,Earth sciences,Shrubs,Valleys,Flowering plants,Medicago,Fabaceae,Plant ecology,Landforms,Topography,Plants,Geomorphology,Grasses,Agriculture,Ecology and environmental sciences,Organisms",United States of America,Data area available at: https://doi.org/10.15142/T3XM19.,Method,Yes,Yes,Online,"https://doi.org/10.15142/T3XM19, 10.15142/T3XM19",N/A,doi.org,N/A,No,No,N/A,Yes,10.1101/453217,25/10/2018,http://dx.doi.org/10.1101/453217,bioRxiv
08/02/2021,2021,10.1371/journal.pone.0246644,"Maternal health,Medicine and health sciences,Fertilization,Anatomy,Physiology,Oocytes,Ovaries,Pregnancy,Bacteria,Cellular types,Biology and life sciences,Reproductive system,Ova,Infertility,Developmental biology,Urology,Organisms,Body fluids,Germ cells,Lactobacillus,Follicular fluid,Embryology,Unexplained infertility,Cell biology,Gut bacteria,Embryos,Women's health,Animal cells,Obstetrics and gynecology",Nigeria,All relevant data are within the paper and its Supporting Information files.,Method,Yes,Yes,Supplementary Information,N/A,N/A,N/A,N/A,No,No,N/A,Yes,10.1101/2020.09.07.285718,08/09/2020,http://dx.doi.org/10.1101/2020.09.07.285718,bioRxiv
03/10/2019,2019,10.1371/journal.pone.0221919,"Antiviral therapy,Labor and delivery,Women's health,Systematic reviews,Public and occupational health,Obstetrics and gynecology,Behavioral and social aspects of health,Diagnostic medicine,Blood pressure,Research and analysis methods,Hypertension,Vascular medicine,Research assessment,Mathematical and statistical techniques,Mathematics,Pregnancy,Medicine and health sciences,Biology and life sciences,Maternal health,Preventive medicine,HIV prevention,Metaanalysis,HIV diagnosis and management,Birth,Statistical methods,Immunology,Statistics,Hypertensive disorders in pregnancy,Vaccination and immunization,Physical sciences,Antiretroviral therapy",Argentina,Supplementary Data are available at the Open Science Framework DOI 10.17605/OSF.IO/U3DHF.,Method,Yes,Yes,Online,"10.17605/OSF.IO/U3DHF, OSF.IO/U3DHF",N/A,Open Science Framework,Method,Yes,No,N/A,No,NA,NA,NA,NA
07/08/2019,2019,10.1371/journal.pone.0220441,"Swine,Amniotes,Metabolism,Organisms,Muscles,Physiology,Animal performance,Musculoskeletal system,Skeletal muscles,Energy metabolism,Gene expression,Mammals,Physiological processes,Carbohydrate metabolism,Diet,Animal management,Eukaryota,Agriculture,Glucose metabolism,Biology and life sciences,Nutrition,Vertebrates,Gene regulation,Animals,Medicine and health sciences,Biochemistry,Genetics,Anatomy",Norway,All relevant data is available in the NCBI Sequence Read Archive under accession number PRJNA506343.,Method,Yes,Yes,Supplementary Information|Online,N/A,PRJNA506343,NCBI Bioproject,Method,Yes,No,N/A,No,NA,NA,NA,NA
19/02/2021,2021,10.1371/journal.pone.0246884,"Language,Physiology,Memory,Medicine and health sciences,Cognitive neurology,Aging,Verbal behavior,Neurology,Physiological processes,Computational linguistics,Cognitive science,Cognitive impairment,Geriatric care,Cognition,Developmental biology,Cognitive psychology,Verbal communication,Neuroscience,Behavior,Psychology,Health care,Biology and life sciences,Organism development,Learning and memory,Social sciences,Cognitive neuroscience,Linguistics",Japan,https://figshare.com/articles/dataset/conversation_in_elderly_people/13227800.,Method,Yes,Yes,Supplementary Information|Online,https://figshare.com/articles/dataset/conversation_in_elderly_people/13227800,N/A,figshare,Method|Supplementary,Yes,Yes,Online,Yes,10.1101/841247,14/11/2019,http://dx.doi.org/10.1101/841247,bioRxiv
31/12/2020,2020,10.1371/journal.pone.0244457,"Parasitic diseases,Medical conditions,Genetics,Apicomplexa,Parasitic protozoans,Polymerase chain reaction,Medicine and health sciences,Biology and life sciences,Parasitology,Eukaryota,Uganda,Tropical diseases,Artificial gene amplification and extension,People and places,Protozoans,Plasmodium falciparum,Organisms,Malarial parasites,Malaria,Molecular biology techniques,Parasite groups,Deletion mutation,Geographical locations,Plasmodium,Research and analysis methods,Molecular biology,Africa,Mutation",Uganda,All relevant data are within the paper and its Supporting information files.,Method,Yes,Yes,Supplementary Information,N/A,N/A,N/A,N/A,No,No,N/A,No,NA,NA,NA,NA
11/04/2019,2019,10.1371/journal.pone.0213762,"Medicine and health sciences,Population groupings,Pediatrics,Breast feeding,Families,Sociology,Pregnancy,Women's health,Public and occupational health,Neonatology,Infants,People and places,Education,Social sciences,Population metrics,Child growth,Pregnancy complications,Birth weight,Children,Schools,Maternal health,Child development,Child health,Population biology,Age groups,Physiological parameters,Biology and life sciences,Obstetrics and gynecology,Preterm birth,Birth,Physiology,Body weight,Birth rates",China,"This study used data from the Chinaâ€™s Under 5 Child Nutrition and Health Surveillance System (U5CNHSS). This system is co-established by the National Health and Family Planning Commission of the Peopleâ€™s Republic of China and Sichuan University, and finally owned by National Health and Family Planning Commission of the Peopleâ€™s Republic of China. The researchers did not obtain consent to publicly share data. The de-identified dataset is available upon request to interested researchers. For data requests, please contact the Department of Science and Technology of West China Second University Hospital, Sichuan University, at: fu2yuankjb@163.com. This department is in charge of all the programs in the hospital, including the data management. One staff from the department (named Xian He) monitors this email.",Method,Yes,No,N/A,N/A,N/A,N/A,Method,Yes,No,N/A,No,NA,NA,NA,NA
10/06/2021,2021,10.1371/journal.pcbi.1009017,"Cellular types,Neurochemistry,Organic chemistry,Acetylcholine,Cholinergics,Mice,Biology and life sciences,Eukaryota,Vertebrates,Behavior,Psychology,Cell biology,Amines,Organic compounds,Cognitive science,Learning,Zoology,Cellular neuroscience,Neuromodulation,Biochemistry,Amniotes,Rodents,Learning and memory,Organisms,Chemical compounds,Physical sciences,Dopamine,Catecholamines,Mammals,Animal cells,Cognitive psychology,Neurons,Neuroscience,Neurotransmitters,Chemistry,Animal behavior,Animals,Biogenic amines,Hormones,Social sciences",United Kingdom,The authors confirm that all data underlying the findings are fully available without restriction. All data and code are available on GitHub (https://github.com/gawygawy/snPlast).,Method,Yes,Yes,Online,https://github.com/gawygawy/snPlast,N/A,Github,DA|Method,Yes,Yes,Online,No,NA,NA,NA,NA
01/10/2020,2020,10.1371/journal.pone.0239982,"Nucleons,Biology and life sciences,Lipids,Diagnostic radiology,Fats,Spectrum analysis techniques,Magnetic resonance spectroscopy,NMR spectroscopy,Medicine and health sciences,Metabolites,Signal filtering,Biochemistry,Physical sciences,Imaging techniques,Diagnostic medicine,Condensed matter physics,Magnetism,Research and analysis methods,Magnetic resonance imaging,Magnetic fields,Metabolism,Engineering and technology,Signal processing,Radiology and imaging,Nuclear physics,Protons,Physics",Germany,All relevant data are within the manuscript and its Supporting Information files.,Method,Yes,Yes,Supplementary Information,N/A,N/A,N/A,Method,Yes,No,N/A,No,NA,NA,NA,NA
29/01/2019,2019,10.1371/journal.pone.0211338,"Drug research and development,Computer and information sciences,Health care providers,Geographical locations,Professions,Computer networks,Cognitive science,Phase I clinical investigation,Japan,Decision making,Research design,Clinical trials,Social sciences,Asia,Pharmacology,Survey research,Physicians,Clinical trials (cancer treatment),Medicine and health sciences,Research and analysis methods,Biology and life sciences,People and places,Internet,Medical personnel,Clinical medicine,Cognitive psychology,Psychology,Neuroscience,Medical doctors,Surveys,Population groupings,Cognition,Health care",Japan,All relevant data from the online survey are within the paper and its Supporting Information files. All relevant interview data are stored in DIPEx Japan's database (Japanese only). https://www.dipex-j.org/clinical-trial/.,Method,Yes,Yes,Online,https://www.dipex-j.org/clinical-trial/,N/A,N/A,Method,Yes,No,N/A,No,NA,NA,NA,NA
26/07/2022,2022,10.1371/journal.pone.0271543,"Anatomy,Biology and life sciences,Macular degeneration,Diagnostic radiology,Physiology,Eyes,Cardiovascular physiology,Sensory perception,Tomography,Medical conditions,Imaging techniques,Ophthalmology,Radiology and imaging,Vasculogenesis,Cognitive science,Cognitive psychology,Geriatrics,Research and analysis methods,Social sciences,Retina,Geriatric ophthalmology,Perception,Eye diseases,Retinal degeneration,Diagnostic medicine,Visual acuity,Ocular anatomy,Vision,Ocular system,Neuroscience,Psychology,Retinal disorders,Cardiology,Morphogenesis,Developmental biology,Angiography,Medicine and health sciences,Macular disorders,Cardiovascular imaging,Cardiovascular medicine,Fovea centralis,Head",Japan,All relevant data are within the paper and its Supporting Information files.,Method,Yes,Yes,Supplementary Information,N/A,N/A,N/A,Method,Yes,No,N/A,Yes,10.21203/rs.3.rs-910002/v1,22/09/2021,http://dx.doi.org/10.21203/rs.3.rs-910002/v1,Research Square
21/05/2020,2020,10.1371/journal.pone.0233567,"Social sciences,Dogs,Fecundity,Eukaryota,Urban areas,Geography,Infectious diseases,Species interactions,Neighborhoods,Amniotes,Population metrics,Animals,Human geography,Arthropoda,Bacterial diseases,Invertebrates,Earth sciences,Biology and life sciences,Rocky Mountain spotted fever,Ixodes,Vertebrates,Population biology,Arachnida,Ticks,Pets and companion animals,Disease vectors,Animal types,Mammals,Human mobility,Zoology,Geographic areas,Organisms,Medicine and health sciences",United States of America,All relevant data are within the manuscript.,Method,Yes,No,N/A,N/A,N/A,N/A,Method,Yes,No,N/A,No,NA,NA,NA,NA
18/03/2021,2021,10.1371/journal.ppat.1009403,"Cell processes,Physiology,Antibodies,Viral structure,Structural proteins,Precipitation techniques,Immune physiology,Cell biology,Viral envelope,Proteins,Immune system proteins,Secretory pathway,Immunology,Immunoprecipitation,Protein expression,Medicine and health sciences,Ubiquitination,Biology and life sciences,Microbiology,Post-translational modification,Research and analysis methods,Virology,Transfection,Molecular biology assays and analysis techniques,Molecular biology,Molecular biology techniques,Biochemistry,Gene expression and vector techniques",United States of America,All relevant data are within the manuscript.,Method,Yes,No,N/A,N/A,N/A,N/A,N/A,No,No,N/A,No,NA,NA,NA,NA
28/02/2022,2022,10.1371/journal.pone.0264022,"Veterinary medicine,Research and analysis methods,Small animals,People and places,Medicine and health sciences,Organisms,Research design,Cancer treatment,Naturopathy,Eukaryota,Veterinarians,Survey research,Veterinary science,Zoology,Professions,Population groupings,Veterinary diseases,Biology and life sciences,Complementary and alternative medicine,Oncology,Questionnaires,Animals",Germany,All relevant data are within the paper and its Supporting Information files.,Method,Yes,Yes,Supplementary Information,N/A,N/A,N/A,N/A,No,No,N/A,No,NA,NA,NA,NA
28/10/2021,2021,10.1371/journal.pone.0259143,"Earth sciences,Atmospheric science,Surgical and invasive medical procedures,Engineering and technology,Cornea,Statistical methods,Biology and life sciences,Measurement,Medicine and health sciences,Head,Humidity,Medical risk factors,Research and analysis methods,Meteorology,Ocular system,Intraocular pressure,Mathematics,Ocular anatomy,Multivariate analysis,Eyes,Epidemiology,Anatomy,Mathematical and statistical techniques,Ophthalmic procedures,Physical sciences,Statistics",United States of America,All relevant data are within the manuscript.,Method,Yes,No,N/A,N/A,N/A,N/A,N/A,No,No,N/A,No,NA,NA,NA,NA
10/02/2020,2020,10.1371/journal.pbio.3000626,"Lipids,RNA viruses,Pathogens,Retroviruses,Research and analysis methods,Cell membranes,Viral pathogens,Medicine and health sciences,Lentivirus,HIV,Microbiology,Organisms,Viral transmission and infection,Immunodeficiency viruses,Cellular structures and organelles,Fluorophotometry,Vesicles,Viral structure,Pathology and laboratory medicine,Spectrum analysis techniques,Spectrophotometry,Cell biology,Membrane fusion,Medical microbiology,Viral entry,Viruses,Biology and life sciences,Biochemistry,Virology,Fluorescence resonance energy transfer,Microbial pathogens,Virions,Endosomes,Liposomes",United States of America,All relevant data are within the paper and its Supporting Information files.,Method,Yes,Yes,Supplementary Information,N/A,N/A,N/A,Method,Yes,No,N/A,No,NA,NA,NA,NA
11/06/2020,2020,10.1371/journal.pone.0234361,"Motion,Centrifuges,Engineering and technology,Public and occupational health,Centrifugation,Medicine and health sciences,Biological locomotion,Sports science,Physical activity,Research and analysis methods,Velocity,Separation processes,Physical fitness,Sports and exercise medicine,Physiology,Jumping,Strength training,Equipment,Classical mechanics,Biology and life sciences,Laboratory equipment,Exercise,Physics,Physical sciences",Germany,All relevant data are within the paper and its Supporting Information files.,Method,Yes,No,N/A,N/A,N/A,N/A,N/A,No,No,N/A,No,NA,NA,NA,NA
23/04/2019,2019,10.1371/journal.pone.0215288,Missing,Spain,"Five English collections, mainly about newspapers documents (http://trec.nist.gov/data/docs_eng.html), used in TREC-8, 9 and 10 Question Answering competitions; a dictionary of Spanish (Santana et al. 2007); and the dictionaries reported in the Apertium project (https://sourceforge.net/p/apertium/svn/HEAD/tree/trunk/).",Fulltext,Yes,Yes,Online,"https://code.google.com/archive/p/dawgdic/downloads, http://www3.cs.stonybrook.edu/~algorith/implement/watson/implement.shtml, http://www.jandaciuk.pl/adfa.html, http://dis.um.es/~ginesgm/files/doc/memory.cpp, http://dis.um.es/~ginesgm/medidas.html#mt, https://www.imperialviolet.org/binary/critbit.pdf, https://sourceforge.net/p/apertium/svn/HEAD/tree/trunk/, http://storage.googleapis.com/books/ngrams/books/datasetsv2.html, http://trec.nist.gov/data/docs_eng.html",N/A,"SourceForge, code.google.com",N/A,No,No,N/A,No,NA,NA,NA,NA
15/04/2019,2019,10.1371/journal.pone.0214546,"Physics,Biology and life sciences,Macromolecules,Coatings,Polymers,Matrix-assisted laser desorption ionization time-of-flight mass spectrometry,Anilines,Polymerization,Organic compounds,Laccases,Enzymes,Research and analysis methods,Physical sciences,Materials science,Enzymology,Cellulose,Electric conductivity,Manufacturing processes,Analytical chemistry,Polymer chemistry,Spectrum analysis techniques,Chemical compounds,Biochemistry,Organic chemistry,Electricity,Surface treatments,Materials,Chemical reactions,Engineering and technology,Proteins,Chemistry,Mass spectrometry",South Korea,All relevant data are within the manuscript and its Supporting Information files.,Method,Yes,No,N/A,N/A,N/A,N/A,N/A,No,No,N/A,No,NA,NA,NA,NA
22/09/2021,2021,10.1371/journal.pone.0257696,"Pediatrics,Death rates,Population biology,Preventive medicine,Public and occupational health,Children,Age groups,Social networks,Families,Child health,Population metrics,Computer and information sciences,People and places,Biology and life sciences,Network analysis,Emotions,Mothers,Medicine and health sciences,Ethnicities,Arabic people,Psychology,Population groupings,Social sciences,Sociology",Israel,"Restrictions on publicly sharing any part of the data were being imposed by the Committee on Health and Welfare Sciences, The Faculty of Social Welfare and Health Sciences at the University of Haifa, under approval number 189/19, since the data contain potentially identifying and personal information, for which the committee has requested to keep confidentially under the researchersâ€™ control. The data will be available upon request from Dr. Mina Zemach, mina@midgam.co.il. Dr. Mina Zemach is a researcher at Midgam Consulting and Research, who has kindly agreed to keep the data and supply it upon request, as an independent third party who was not involved in any part of the underlying research or this manuscript.",Method,Yes,No,N/A,N/A,N/A,N/A,N/A,No,No,N/A,No,NA,NA,NA,NA
02/12/2020,2020,10.1371/journal.pone.0242570,"Behavior,Thailand,Tobacco control,Public policy,Health care facilities,Habits,Law enforcement,Age groups,Geographical locations,Taxes,Asia,Asian people,Hospitals,Public and occupational health,Criminal justice system,Political science,Thai people,Health care,Smoking habits,Psychology,People and places,Biology and life sciences,Law and legal sciences,Social sciences,Population groupings,Medicine and health sciences,Ethnicities",United States of America,"All data used to prepare this paper are available from the cited sources. The Universal Health Coverage Scheme hospitalization database is not publicly available. Access to data can be requested directly from the National Health Security Office, Thailand. For further inquiries, please contact the Bureau of Health Information and Outcome Evaluation, National Health Security Office at 120 Thung Song Hong, Lak Si, Bangkok, Thailand 10210, or call 662-141-4000.",Method,Yes,No,N/A,N/A,N/A,N/A,N/A,No,No,N/A,No,NA,NA,NA,NA
24/09/2020,2020,10.1371/journal.pone.0239759,"Digestive system,Face,Distance measurement,Jaw,Mouth,Skull,Mandible,Computer software,Medicine and health sciences,Biology and life sciences,Computer and information sciences,Head,Software engineering,Molars,Anatomy,Alveolar bone,Maxilla,Engineering and technology,Measurement,Teeth,Musculoskeletal system,Skeleton",South Korea,"Data cannot be made publicly available as the data contain sensitive and identifying information. The authors confirm that the data will be made available upon request. Requests may be sent to the corresponding author (orthojn@yuhs.ac). For non-author institutional contact for data access, data are available from the institutional review board of Yonsei University Dental Hospital (contact via dentalirb@yuhs.ac) for researchers who meet the criteria for access to confidential data.",Method,Yes,No,N/A,N/A,N/A,N/A,N/A,No,No,N/A,No,NA,NA,NA,NA
29/07/2022,2022,10.1371/journal.pone.0267160,"Transportation infrastructure,Civil engineering,Medical conditions,Pandemics,COVID 19,Commerce,Medicine and health sciences,Infectious diseases,Shops,Urban geography,Social distancing,Cities,Geography,Human geography,Economics,Economic impact analysis,Earth sciences,Retail,Social sciences,Epidemiology,Infectious disease control,Engineering and technology,Roads,Viral diseases,Economic analysis,Transportation",Russia,"Data cannot be shared publicly because the data is owned by RMC Bureau and we do not have permission to share the data. However, we can provide all the data for replication purposes if we can anonymize the data. In other words, while other researchers can exactly replicate the analysis, they will not be able to pin-point the exact geographical location of the counter where footfall is computed. That way we can protect the interest of the data provider, yet allow other researchers to replicate our work to ensure integrity.",Method,Yes,Yes,Supplementary Information,N/A,N/A,N/A,N/A,No,No,N/A,No,NA,NA,NA,NA
03/09/2020,2020,10.1371/journal.pone.0238217,"Psychological stress,Economic geography,Social sciences,Pandemics,People and places,Professions,Medical personnel,Safety,Health care providers,Geography,Mental health and psychiatry,Infectious diseases,COVID 19,Emotions,Epidemiology,Nurses,Safety equipment,Psychology,Health care,Earth sciences,Biology and life sciences,Engineering and technology,Equipment,Viral diseases,Economics,Low and middle income countries,Public and occupational health,Population groupings,Medicine and health sciences,Medical conditions",United States of America,All relevant data are within the manuscript and its Supporting Information files.,Method,Yes,Yes,Supplementary Information,N/A,N/A,N/A,Method,Yes,No,N/A,Yes,10.1101/2020.05.17.20101915,22/05/2020,http://dx.doi.org/10.1101/2020.05.17.20101915,medRxiv
29/08/2019,2019,10.1371/journal.pone.0221186,"Glass,Behavior,Decision making,Materials science,Organisms,Cognitive psychology,Social psychology,Prosocial behavior,Cognitive science,Vertebrates,Recreation,Dogs,Psychology,Age groups,People and places,Materials,Cognition,Biology and life sciences,Amorphous solids,Mammals,Amniotes,Eukaryota,Games,Families,Population groupings,Social cognition,Animals,Neuroscience,Physical sciences,Social sciences,Children",Germany,All relevant data are within the manuscript and its Supporting Information files.,Method,Yes,Yes,Supplementary Information,N/A,N/A,N/A,N/A,No,No,N/A,No,NA,NA,NA,NA
06/11/2020,2020,10.1371/journal.pone.0241637,"Biology and life sciences,Social sciences,Ecology and environmental sciences,Agricultural irrigation,Soil carbon,Chemistry,People and places,Soil chemistry,Brazil,South America,Agricultural soil science,Soil science,Physical sciences,Environmental chemistry,Ecology,Plant science,Geographical locations,Geography,Plant ecology,Ecosystems,Terrestrial environments,Land use,Human geography,Grasslands,Agricultural methods,Plant communities,Earth sciences,Agriculture,Forests",Brazil,"All relevant data are available without restriction. All carbon maps developed in this study (aboveground, belowground, and soil carbon stocks for 1990-2018 period) are available for download at https://doi.org/10.1594/PANGAEA.923885 and http://www.biosfera.dea.ufv.br/en-US/bancos.",Method,Yes,Yes,Online,"10.1594/PANGAEA.923885, https://doi.org/10.1594/PANGAEA.923885, http://www.biosfera.dea.ufv.br/en-US/bancos",N/A,N/A,Method,Yes,No,N/A,No,NA,NA,NA,NA
01/04/2021,2021,10.1371/journal.pgen.1009395,"Mammals,Lymphoma,Medicine and health sciences,Haplotypes,Organisms,Eukaryota,Zoology,Vertebrates,Oncology,Hematology,Biology and life sciences,Genomics,Computational biology,Epidemiology,Pets and companion animals,Dogs,Hematologic cancers and related disorders,Cancers and neoplasms,Genetic mapping,Genome-wide association studies,Medical risk factors,Human genetics,Cancer risk factors,Amniotes,Genome analysis,Animals,Heredity,Genetic loci,Genetics",France,All genotyping data ia available at doi:10.5061/dryad.hx3ffbgd4.,Method,Yes,Yes,Supplementary Information|Online,"https://www.ncbi.nlm.nih.gov/gap/phegeni, 10.5061/dryad.hx3ffbgd4, https://www.ncbi.nlm.nih.gov/gene",N/A,"Dryad Digital Repository, ncbi.nlm.nih.gov",Method,Yes,No,N/A,Yes,10.1101/2020.07.23.214007,24/07/2020,http://dx.doi.org/10.1101/2020.07.23.214007,bioRxiv
06/08/2021,2021,10.1371/journal.pone.0255583,"Connective tissue,Mathematical and statistical techniques,Anatomy,Electronic medical records,Statistics,Regression analysis,Medicine and health sciences,Hispanic people,Population groupings,Information technology,Research and analysis methods,Mathematics,Statistical data,Body weight,Physical sciences,People and places,Body mass index,Statistical methods,Adipose tissue,Physiology,Ethnicities,Linear regression analysis,Health information technology,Physiological parameters,Health care,Biological tissue,Computer and information sciences,Biology and life sciences,Obesity",United States of America,Data from the All of Us Research Program is accessible only through the Researcher Workbench (https://workbench.researchallofus.org) as stipulated in the informed consent of participants in the program. This data use agreement prohibits investigators from providing row level data on AllofUs participants and thus providing a de-identified dataset is not possible for this manuscript. The code used for this demonstration project is available within the Researcher Workbench at https://workbench.researchallofus.org/workspaces/aou-rw-54ae5687/racialethnicdifferencesanthropolipidalt/notebooks/Notebook_addressingComments.ipynb.,Method,Yes,Yes,Online,"https://workbench.researchallofus.org/workspaces/aou-rw-54ae5687/racialethnicdifferencesanthropolipidalt/notebooks/Notebook_addressingComments.ipynb, https://workbench.researchallofus.org",N/A,N/A,DA|Method,Yes,Yes,Online,No,NA,NA,NA,NA
07/03/2022,2022,10.1371/journal.pntd.0010167,"Viruses,Antibodies,Organisms,Public and occupational health,Medical microbiology,Nurses,Population groupings,Immunology,Safety equipment,Immune physiology,Professions,People and places,Serology,Health care,Ebola virus,Medicine and health sciences,Research and analysis methods,Hemorrhagic fever viruses,Pathology and laboratory medicine,Pathogens,Equipment,Immune system proteins,Biochemistry,Enzyme-linked immunoassays,Physiology,Microbiology,Immunoassays,Viral pathogens,Health care providers,Filoviruses,Proteins,Medical personnel,Cross reactivity,Engineering and technology,Immunologic techniques,Safety,Microbial pathogens,RNA viruses,Biology and life sciences",United States of America,All relevant data are within the manuscript and its Supporting Information files.,Method,Yes,Yes,Supplementary Information,N/A,N/A,N/A,Method,Yes,No,N/A,No,NA,NA,NA,NA
10/06/2022,2022,10.1371/journal.pone.0268286,"Emotions,Applied mathematics,Behavior,Mathematics,Finance,Mental health and psychiatry,Game theory,Cognitive psychology,Medicine and health sciences,Neuroscience,Social sciences,Economics,Ultimatum game,Clinical psychology,Cognitive science,Dictator game,Physical sciences,Biology and life sciences,Psychology,Mental health therapies",South Korea,"All materials, analyzed data, and codes are available at https://osf.io/bpfea/.",Fulltext,Yes,Yes,Online,"https://osf.io/bpfea/, https://osf.io/bpfea/?view_only, https://line.me/en/",N/A,Open Science Framework,DA,Yes,Yes,Online,No,NA,NA,NA,NA
26/03/2021,2021,10.1371/journal.pone.0246633,"Developmental biology,Movement disorders,Metabolic disorders,Cardiomyocytes,Biology and life sciences,Fibrosis,Cardiovascular diseases,Medical conditions,Medicine and health sciences,Diabetes mellitus,Biological tissue,Animal cells,Endocrine disorders,Cell biology,Heart failure,Neurodegenerative diseases,Muscle tissue,Imaging techniques,Cardiology,Friedreich's ataxia,Diagnostic radiology,Research and analysis methods,Cardiomyopathies,Cardiovascular medicine,Diagnostic medicine,Cellular types,Neurology,Anatomy,Magnetic resonance imaging,Radiology and imaging,Muscle cells,Endocrinology",Brazil,Data cannot be shared publicly because it may contain patient personal information. Data are fully available from our (UNICAMP) Institutional Data Access / Ethics Committee (contact via email: neuromuscular@unicamp.br) for researchers who meet the criteria for access to confidential data.,Method,Yes,No,N/A,N/A,N/A,N/A,Method,Yes,No,N/A,No,NA,NA,NA,NA
09/09/2020,2020,10.1371/journal.pone.0238461,"Behavior,Cognitive psychology,Recreation,Motivation,Clinical medicine,Cognitive neuroscience,Classical mechanics,Neurology,Acceleration,Signs and symptoms,Neuroscience,Physics,Deceleration,Cognitive impairment,Cognitive science,Cognition,Fatigue,Public and occupational health,Sports science,Cognitive neurology,Physical sciences,Psychology,Decision making,Biology and life sciences,Sports,Physical activity,Social sciences,Medicine and health sciences",Italy,All relevant data are within the manuscript and its Supporting Information files.,Method,Yes,Yes,Supplementary Information,N/A,N/A,N/A,N/A,No,No,N/A,No,NA,NA,NA,NA
30/07/2020,2020,10.1371/journal.pone.0236524,"Public and occupational health,Behavioral and social aspects of health,Psychology,Psychological attitudes,Cognition,Neuroscience,Social sciences,Decision making,Mental health and psychiatry,Child health,Health care facilities,Cognitive science,Pediatrics,Patients,Health care,Medicine and health sciences,Biology and life sciences,Cognitive psychology,Quality of care",Belgium,"The anonymized and de-identified quantitative patient exit data set is provided as a supplementary file and quotes relevant to this manuscript are provided in the text. Interview audio files and complete transcripts (which contain additional information and will be used for other manuscripts) are governed under the Institute of Tropical Medicine (ITM) data sharing and open access policy. Access requests for ITM research data can be made to ITMâ€™s central point for research data access by means of submitting a completed Data Access Request Form. These requests will be reviewed for approval by ITMs Data Access Committee, with further approval from the ITM Research Ethics Committee. Please see this link for more information https://www.itg.be/F/data-sharing-open-access. Contact information for ITM data access committee is eb.gti@sseccaatadhcraeserMTI.",Method,Yes,Yes,Supplementary Information|Online,https://www.itg.be/F/data-sharing-open-access,N/A,N/A,N/A,No,No,N/A,No,NA,NA,NA,NA
12/03/2021,2021,10.1371/journal.pone.0248349,"Chemical elements,Research and analysis methods,Data management,Physical sciences,Tin,Applied mathematics,Data mining,Computing methods,Built structures,Mathematics,Information storage and retrieval,Drug discovery,Biology and life sciences,Eukaryota,Drug research and development,Medicine and health sciences,Simulation and modeling,Trees,Pharmacology,Algorithms,Computer and information sciences,Engineering and technology,Chemistry,Information technology,Organisms,Plants,Structural engineering",China,All dataset files are available from the SPMF Website/database (http://www.philippe-fournier-viger.com/spmf/).,Fulltext,Yes,Yes,Online,http://www.philippe-fournier-viger.com/spmf/,N/A,N/A,N/A,No,Yes,Online,No,NA,NA,NA,NA
20/08/2019,2019,10.1371/journal.pone.0221404,"Medicine and health sciences,Diet,Rodents,Community ecology,Ecology and environmental sciences,Organisms,Mammals,Bioenergetics,Voles,Ecology,Gamefowl,Trophic interactions,Eukaryota,Amniotes,Predation,Fowl,Biology and life sciences,Birds,Biochemistry,Nutrition,Food,Raptors,Grouse,Animals,Vertebrates",United Kingdom,All relevant data are within the paper and its Supporting Information files.,Method,Yes,Yes,Supplementary Information,N/A,N/A,N/A,Method,Yes,No,N/A,No,NA,NA,NA,NA
25/10/2021,2021,10.1371/journal.pntd.0009837,"Medical microbiology,Mammals,Viral pathogens,Medicine and health sciences,Viruses,Species interactions,Organisms,Eukaryota,Entomology,Disease vectors,Zoology,Bunyaviruses,Pathogens,Anatomy,People and places,Microbial pathogens,Geographical locations,Saliva,Vertebrates,Insect vectors,Pathology and laboratory medicine,Mosquitoes,Colorado,Rift Valley fever virus,North America,United States,Biology and life sciences,Invertebrates,Insects,Infectious diseases,RNA viruses,Ovaries,Arthropoda,Physiology,Medical conditions,Reproductive system,Amniotes,Animals,Body fluids,Blood,Microbiology,Ruminants,Deer",United States of America,All relevant data are within the manuscript and its Supporting information files.,Method,Yes,Yes,Supplementary Information,N/A,N/A,N/A,N/A,No,No,N/A,No,NA,NA,NA,NA
28/10/2021,2021,10.1371/journal.pone.0259109,"Medical conditions,Nucleic acids,Microbiology,Parasitology,Genetics,Gene expression,Polyadenylation,Genomics,Medicine and health sciences,Drug therapy,Viral transmission and infection,Biochemistry,Messenger RNA,Host cells,Biology and life sciences,Pharmaceutics,Parasite groups,Virology,RNA,Parasitic diseases,Apicomplexa",United States of America,The high throughput sequencing data associated with this project are available under Bioproject PRJNA713353. https://www.ncbi.nlm.nih.gov/bioproject/PRJNA713353.,Method,Yes,Yes,Supplementary Information|Online,https://www.ncbi.nlm.nih.gov/bioproject/PRJNA713353,PRJNA713353,NCBI Bioproject,N/A,No,No,N/A,No,NA,NA,NA,NA
06/05/2021,2021,10.1371/journal.pone.0250859,"Forests,Biology and life sciences,Trees,Tea,Eukaryota,Seeds,Vertebrates,Zoology,Plant anatomy,Medicine and health sciences,Amniotes,Natural selection,Ecosystems,Organisms,Ecology,Plants,Seedlings,Plant science,Reproductive success,Evolutionary processes,Dendrology,Terrestrial environments,Diet,Animals,Birds,Ecology and environmental sciences,Beverages,Evolutionary biology,Nutrition",United States of America,Data has been uploaded to KNB and is publicly available here: https://knb.ecoinformatics.org/view/doi%3A10.5063%2FFX77T3.,Method,Yes,Yes,Online,https://knb.ecoinformatics.org/view/doi%3A10.5063%2FFX77T3,N/A,KNB: The Knowledge Network for Biocomplexity,Method,Yes,No,N/A,No,NA,NA,NA,NA
21/12/2020,2020,10.1371/journal.pone.0242981,"Psychology,Geographical locations,Development economics,Physical sciences,Systems science,Environmental economics,Behavior,Economic development,Asia,Salaries,China,Labor economics,People and places,Complex systems,Social sciences,Economics,Behavioral economics,Biology and life sciences,Mathematics,Nonlinear systems,Ecology and environmental sciences,Sustainability science,Computer and information sciences",China,All data generated or analyzed during this study are included in the paper and its files.,N/A,No,No,N/A,N/A,N/A,N/A,N/A,No,No,N/A,No,NA,NA,NA,NA
19/07/2021,2021,10.1371/journal.pone.0253621,"Switzerland,People and places,Economics,Medical risk factors,Psychology,Social cognition,Europe,Geographical locations,Labor economics,Public and occupational health,Medicine and health sciences,Altruistic behavior,Pandemics,Employment,Medical conditions,Behavior,COVID 19,Prosocial behavior,Epidemiology,Habits,Cognitive psychology,Cognitive science,Viral diseases,Social psychology,Infectious diseases,Social sciences,Biology and life sciences,Neuroscience",Missing,The data and the code for the analysis are available on the open science foundation web site osf.io/vg5j7.,Method,Yes,Yes,Online,osf.io/vg5j7,N/A,Open Science Framework,DA|Method,Yes,Yes,Online,No,NA,NA,NA,NA
16/08/2019,2019,10.1371/journal.pone.0221426,"C-reactive proteins,Research and analysis methods,Signs and symptoms,Pediatric infections,Biomarkers,Inflammatory diseases,Sepsis,Research facilities,Diagnostic medicine,Proteins,Infectious diseases,Biochemistry,Pathology and laboratory medicine,Independent laboratories,Medicine and health sciences,Biology and life sciences,Pediatrics,Research laboratories",Germany,All relevant data are within the manuscript and its Supporting Information files.,Method,Yes,Yes,Supplementary Information,N/A,N/A,N/A,Method,Yes,No,N/A,No,NA,NA,NA,NA
12/06/2020,2020,10.1371/journal.pone.0234657,"Population groupings,Health economics,Children,Political science,Fertility rates,Schools,Public policy,Public pensions,Welfare economics,Families,Medicine and health sciences,Biology and life sciences,Economics,People and places,Health care,Age groups,Population metrics,Health insurance,Sociology,China,Education,Social sciences,Asia,Human families,Welfare (social security),Social welfare,Geographical locations,Population biology",China,"The data underlying the results presented in the study are available from the China Family Panel Studies (CFPS). This is an open source data where anyone can access through application with the the Institute of Social Science Survey (ISSS) of Peking University.(https://opendata.pku.edu.cn/,Email:opendata@lib.pku.edu.cn).",Fulltext,Yes,Yes,Online,"https://opendata.pku.edu.cn/,Email:opendata@lib.pku.edu.cn",N/A,N/A,N/A,No,No,N/A,No,NA,NA,NA,NA
26/05/2022,2022,10.1371/journal.pone.0265167,"Geographical locations,Human geography,Research and analysis methods,Public and occupational health,People and places,Africa,Social sciences,Natural resources,Health care,Urban areas,Surface water,Ghana,Survey research,Geographic areas,Census,Ecology and environmental sciences,Water resources,Geography,Earth sciences,Urban geography,Research design,Environmental health,Medicine and health sciences,Sanitation,Housing,Water quality,Hydrology",United Kingdom,The data and scripts used in the analysis are available online (http://doi.org/10.5281/zenodo.4556980).,Method,Yes,Yes,Online,"http://doi.org/10.5281/zenodo.4556980, 10.5281/zenodo.4556980",N/A,Zenodo,DA|Method,Yes,Yes,Online,No,NA,NA,NA,NA
10/01/2020,2020,10.1371/journal.pone.0220214,"Signal processing,Gynecologic surgery,Engineering and technology,Laparoscopy,Surgical and invasive medical procedures,Minimally invasive surgery,Noise reduction,Urology,Medicine and health sciences,Telecommunications,Robotics,Mechanical engineering",Israel,All relevant data are within the manuscript and its Supporting Information files.,Method,Yes,No,N/A,N/A,N/A,N/A,Method,Yes,No,N/A,Yes,10.1101/701078,14/07/2019,http://dx.doi.org/10.1101/701078,bioRxiv
02/04/2020,2020,10.1371/journal.pone.0231074,"Imaging techniques,Diagnostic radiology,Medicine and health sciences,Tomography,Cornea,Eye lens,Ophthalmology,Anatomy,Topographic maps,Earth sciences,Ophthalmic procedures,Biology and life sciences,Eyes,Radiology and imaging,Diagnostic medicine,Geography,Surgical and invasive medical procedures,Head,Ocular system,Ocular anatomy,Research and analysis methods,Refractive surgery,Cartography,Eye diseases",Japan,All relevant data are within the manuscript and its Supporting Information files.,Method,Yes,Yes,Supplementary Information,N/A,N/A,N/A,Method,Yes,No,N/A,Yes,10.1101/688929,01/07/2019,http://dx.doi.org/10.1101/688929,bioRxiv
14/12/2020,2020,10.1371/journal.pgen.1009258,"Connective tissue,Anatomy,Mesoderm,Molecular biology assays and analysis techniques,Protein complexes,Gene expression and vector techniques,Medicine and health sciences,Genetics,Molecular biology techniques,Bioenergetics,Fibroblasts,Proteins,Research and analysis methods,Cellular types,Cellular structures and organelles,Molecular biology,Connective tissue cells,Life cycles,Phenotypes,Cell biology,Animal cells,Larvae,Mitochondria,Biochemistry,Developmental biology,Gene expression,Hyperexpression techniques,Proteasomes,Biological tissue,Embryology,Energy-producing organelles,Biology and life sciences",United States of America,All relevant data are within the manuscript and its Supporting Information files.,Method,Yes,No,N/A,N/A,N/A,N/A,N/A,No,No,N/A,No,NA,NA,NA,NA
05/08/2019,2019,10.1371/journal.pbio.3000399,"Population biology,Medicine and health sciences,Population size,Cell biology,Simulation and modeling,Breast tumors,Oncology,Biology and life sciences,Cell cultures,Theoretical ecology,Ecology,Cancers and neoplasms,Population metrics,Biological cultures,Cell death,Ecology and environmental sciences,Research and analysis methods,Breast cancer,Cell growth,Death rates,Cell processes",United States of America,All code and data is available on Github at: https://github.com/brocklab/Johnson-AlleeGrowthModel.git.,Method,Yes,Yes,Supplementary Information|Online,https://github.com/brocklab/Johnson-AlleeGrowthModel.git,N/A,Github,DA|Method|Supplementary,Yes,Yes,Online,Yes,10.1101/585216,22/03/2019,http://dx.doi.org/10.1101/585216,bioRxiv
31/01/2022,2022,10.1371/journal.pntd.0009798,"Medical conditions,Nematoda,Zoology,Topography,Organisms,Malarial parasites,Medicine and health sciences,Loa loa,Landforms,Co-infections,Malaria,Parasitic protozoans,Parasitology,Parasitic diseases,Parasite groups,Earth sciences,Geomorphology,Protozoans,Plasmodium,Apicomplexa,Invertebrates,Tropical diseases,Eukaryota,Islands,Infectious diseases,Biology and life sciences,Animals,Nematode infections",Switzerland,All relevant data are within the manuscript and its Supporting Information files.,Method,Yes,Yes,N/A,N/A,N/A,N/A,Method,Yes,No,N/A,No,NA,NA,NA,NA
25/09/2019,2019,10.1371/journal.pone.0222936,"Wales,Geographical locations,Paleogenetics,Evolutionary systematics,Biology and life sciences,Taxonomy,European Union,Data management,Europe,Phylogenetics,England,People and places,Paleontology,Plants,Organisms,United Kingdom,Earth sciences,Eukaryota,Phylogenetic analysis,Ireland,Computer and information sciences,Evolutionary biology,Trees",United Kingdom,All relevant data are within the paper and its Supporting Information files.,Method,Yes,Yes,Supplementary Information,N/A,N/A,N/A,Method,Yes,No,N/A,No,NA,NA,NA,NA
24/10/2019,2019,10.1371/journal.pone.0224103,"Body fluids,Mental health and psychiatry,Adipose tissue,Blood plasma,Eating disorders,Obesity,Peptide hormones,Families,Anatomy,Anorexia nervosa,Growth hormone,Physiological parameters,Biology and life sciences,Hormones,Medicine and health sciences,Public and occupational health,Physiology,Child health,Biological tissue,Childhood obesity,Body mass index,Body weight,Biochemistry,People and places,Population groupings,Children,Age groups,Pediatrics,Blood",United States of America,All relevant data are within the manuscript and its Supporting Information files.,Fulltext,Yes,Yes,Supplementary Information,N/A,N/A,N/A,N/A,No,No,N/A,No,NA,NA,NA,NA
25/10/2019,2019,10.1371/journal.pone.0224477,"Population biology,Echinoderms,Trophic interactions,Forests,Population metrics,Biology and life sciences,Analysis of variance,Statistics,Eukaryota,Behavior,Psychology,Research design,Experimental organism systems,Zoology,Research and analysis methods,Mathematics,Animal models,Statistical methods,Algae,Ecosystems,Organisms,Physical sciences,Plant-animal interactions,Ecology,Mathematical and statistical techniques,Community ecology,Plants,Experimental design,Plant science,Invertebrates,Herbivory,Animal behavior,Animal studies,Terrestrial environments,Animals,Grazing,Death rates,Ecology and environmental sciences,Plant ecology,Sea urchins,Social sciences",Italy,All relevant data are within the paper and its Supporting Information files.,Method,Yes,Yes,Supplementary Information,N/A,N/A,N/A,Method,Yes,No,N/A,No,NA,NA,NA,NA
22/07/2021,2021,10.1371/journal.pone.0255018,"Cognitive science,Chemical reactions,Sports and exercise medicine,Biology and life sciences,Condensed matter physics,Cognitive impairment,Chemical precipitation,Physical sciences,Strength training,Physical fitness,Cognitive neurology,Physics,Physical activity,Exercise,Cognition,Physiological processes,People and places,Chemistry,Population groupings,Sleep,Learning and memory,Neuroscience,Crystallography,Sports science,Social sciences,Medicine and health sciences,Age groups,Adults,Memory,Psychology,Mental health and psychiatry,Physiology,Elderly,Public and occupational health,Neurology,Crystallization,Cognitive neuroscience,Working memory,Cognitive psychology,Solid state physics",United States of America,All relevant data are within the paper and its Supporting information files.,Method,Yes,Yes,Supplementary Information,N/A,N/A,N/A,N/A,No,No,N/A,No,NA,NA,NA,NA
30/04/2020,2020,10.1371/journal.pone.0232293,"Physical sciences,Atmospheric chemistry,Telecommunications,Pollution,Chemical compounds,Asia,Pollutants,Environmental chemistry,Culture,Ecology and environmental sciences,Engineering and technology,Equipment,Earth sciences,Greenhouse gases,Atmospheric science,Sociology,People and places,Transportation,Social sciences,China,Chemistry,Geographical locations,Carbon dioxide",China,All relevant data are within the paper and its Supporting Information files.,Fulltext,Yes,Yes,Supplementary Information,N/A,N/A,N/A,N/A,No,No,N/A,No,NA,NA,NA,NA
17/03/2020,2020,10.1371/journal.pcbi.1007737,"Multiple alignment calculation,Human genomics,Genetics,Genome analysis,Biology and life sciences,Cognitive science,Memory,Split-decomposition method,Computational techniques,Simulation and modeling,Computational biology,Genomic libraries,Research and analysis methods,Database and informatics methods,Cognition,Sequence alignment,Learning and memory,Genomics,Sequence analysis,Bioinformatics,Neuroscience",United States of America,"The CHM1 dataset used to benchmark SVXplorer is available from the Short read archive (accession no. ERR1341794). The NA12878 datasets used to benchmark SVXplorer are available from the Short read archive (accession nos. ERR194147, SRR505885). The fastq files for HG002, HG003, HG004 are available from ftp://ftp-trace.ncbi.nlm.nih.gov/giab/ftp/data/AshkenazimTrio. The VCF files of the variant calls made by the different methods for these datasets can be downloaded from https://doi.org/10.5281/zenodo.3634028.",Method,Yes,Yes,Online,"ftp-trace.ncbi.nlm.nih.gov/giab/ftp/data/AshkenazimTrio, https://doi.org/10.5281/zenodo.3634028, 10.5281/zenodo.3634028","ERR1341794, ERR194147, SRR505885","Zenodo, ftp-trace.ncbi.nlm.nih.gov",Method|Supplementary,Yes,No,N/A,Yes,10.1101/469981,14/11/2018,http://dx.doi.org/10.1101/469981,bioRxiv
03/02/2022,2022,10.1371/journal.pone.0263196,"Animals,Osteichthyes,Physiology,Geology,Sedimentary geology,Organisms,Surface water,Biology and life sciences,Ecology,Hydrology,Ecology and environmental sciences,Marine biology,Eukaryota,Wetland ecosystems,Ecosystems,Fish,Earth sciences,Freshwater fish,Zoology,Delta ecosystems,Sediment,Ingestion,Petrology,Vertebrates,Marine fish,Catfish,Pollution,Physiological processes,Marine and aquatic sciences,Water pollution",Ghana,All relevant data are within the paper.,Method,Yes,No,N/A,N/A,N/A,N/A,Method,Yes,No,N/A,No,NA,NA,NA,NA
09/07/2020,2020,10.1371/journal.pone.0235708,"Biology and life sciences,Neurology,Hospitals,Medical personnel,Quality of life,Critical care and emergency medicine,People and places,Questionnaires,Cognitive science,Activities of daily living,Professions,Population groupings,Research design,Health care facilities,Physicians,Neuroscience,Medicine and health sciences,Cognitive impairment,Survey research,Health care,Medical doctors,Health care providers,Cognitive neurology,Research and analysis methods,Age groups,Cognitive neuroscience,Cohort studies",The Netherlands,All relevant data are within the paper and its Supporting Information files.,Method,Yes,Yes,Supplementary Information,N/A,N/A,N/A,N/A,No,No,N/A,No,NA,NA,NA,NA
29/01/2021,2021,10.1371/journal.pone.0245637,"Ultrasound imaging,Heart failure,Medicine and health sciences,Diagnostic radiology,Biology and life sciences,Pulmonary arteries,Anatomy,Ejection fraction,Radiology and imaging,Pulmonology,Systolic pressure,Arteries,Imaging techniques,Cardiology,Vascular medicine,Blood vessels,Blood pressure,Diagnostic medicine,Pulmonary hypertension,Research and analysis methods,Cardiovascular anatomy,Echocardiography,Heart",Germany,All relevant data are within the manuscript and its Supporting Information files.,Method,Yes,Yes,Supplementary Information,N/A,N/A,N/A,N/A,No,No,N/A,No,NA,NA,NA,NA
13/08/2021,2021,10.1371/journal.pone.0256145,"Cognitive science,Retinopathy,Endocrinology,Medicine and health sciences,Cognitive psychology,Anatomy,Visual impairments,Diabetes mellitus,Retinal disorders,Type 2 diabetes risk,Metabolic disorders,Type 2 diabetes,Diabetic retinopathy,Ocular system,Glaucoma,Biology and life sciences,Neuroscience,Medical conditions,Blindness,Visual acuity,Sensory perception,Head,Ophthalmology,Vision,Social sciences,Endocrine disorders,Psychology,Perception,Eyes,Eye diseases",Ethiopia,All relevant data are within the manuscript and its Supporting information files.,Method,Yes,No,N/A,N/A,N/A,N/A,N/A,No,No,N/A,No,NA,NA,NA,NA
11/03/2022,2022,10.1371/journal.pone.0262834,"Educational attainment,COVID 19,Computer and information sciences,Medical conditions,Pandemics,Social sciences,Medicine and health sciences,Sociology,Internet,Geography,Education,Urban geography,Ireland,Human geography,People and places,Earth sciences,Computer networks,Infectious diseases,Malta,Viral diseases,Europe,Geographical locations,European Union,Cities,Epidemiology",Ireland,The anonymized dataset underlying the results presented in the article are available on the Zenodo database at DOI: 10.5281/zenodo.5830027 (https://doi.org/10.5281/zenodo.5830027).,Method,Yes,Yes,Online,"10.5281/zenodo.5830027, https://doi.org/10.5281/zenodo.5830027",N/A,Zenodo,N/A,No,No,N/A,No,NA,NA,NA,NA
20/04/2020,2020,10.1371/journal.pone.0231499,"Cytokines,Biology and life sciences,Physical sciences,Innate immune system,Antigen-presenting cells,Oncology,Immune cells,Dendritic cells,White blood cells,Immune system,Immune physiology,Physics,T cells,Chemistry,Cell death,Pharmaceutics,Developmental biology,Medicine and health sciences,Immunology,Drug therapy,Animal cells,Mass diffusivity,Chemical physics,Cytotoxic T cells,Cell biology,Cell processes,Blood cells,Cellular types,Physiology,Molecular development,Cancer treatment",United States of America,All relevant data are within the paper.,Fulltext,Yes,No,N/A,N/A,N/A,N/A,N/A,No,No,N/A,No,NA,NA,NA,NA
22/10/2021,2021,10.1371/journal.ppat.1009807,"Biochemistry,Organic chemistry,Carbohydrates,Vesicles,Analytical chemistry,Chemistry,Liquid chromatography,Physiology,Medical conditions,Infectious disease control,Blood cells,Microbiology,Organic compounds,Immune system proteins,Animal cells,Immune cells,Molecular biology,Cell biology,Cellular structures and organelles,Research and analysis methods,Chemical compounds,HIV vaccines,Liquid chromatography-mass spectrometry,B cells,Infectious diseases,Viral vaccines,Chromatographic techniques,Medicine and health sciences,Biology and life sciences,Cellular types,Antibody-producing cells,Physical sciences,Transfection,White blood cells,Immune physiology,Molecular biology techniques,Spectrum analysis techniques,Virology,Immunology,Proteins,Antibodies,Mannose,Mass spectrometry,Vaccines",United States of America,Data are held in the manuscript and supporting files. EV flow cytometry data has been deposited in the flow repository per guidelines: http://flowrepository.org/id/RvFrL8Z1ymwRA5aekFypZzlqlivZ9WwyKZWtNEVkTjSY07MCo1sFaPgl4DwlRCJN. Glycopeptide LC-MS data can be found in the MassIVE database (MSV000088108).,Method,Yes,Yes,Supplementary Information|Online,http://flowrepository.org/id/RvFrL8Z1ymwRA5aekFypZzlqlivZ9WwyKZWtNEVkTjSY07MCo1sFaPgl4DwlRCJN,N/A,FlowRepository,Method|Supplementary,Yes,Yes,Online,Yes,10.1101/2021.07.20.453076,21/07/2021,http://dx.doi.org/10.1101/2021.07.20.453076,bioRxiv
25/04/2022,2022,10.1371/journal.pone.0267218,"Canada,Hospitalizations,Ontario,People and places,Health care,Epidemiology,Viral diseases,Medicine and health sciences,Infectious diseases,Medical conditions,Patients,Pandemics,Virus testing,Diagnostic medicine,Geographical locations,North America,Hospitals,Health care facilities,Mental health and psychiatry,COVID 19,Outpatients",Canada,"The data is not publicly available and access is limited to the Institute for Clinical Evaluative Sciences (ICES) (https://www.ices.on.ca/), which is a prescribed entity under section 45 of Ontarioâ€™s Personal Health Information Protection Act (PHIPA). Researchers, students, policy makers or knowledge users who are affiliated with a publicly funded, not-for-profit organization and who want to obtain and analyze ICES data to answer a research question may submit a request to ICES DAS (https://www.ices.on.ca/DAS/Public-Sector). DAS staff will contact the requestor to discuss the projectâ€™s feasibility, timeline and cost. Projects requesting access to data require the approval of a research ethics board. We are happy to share our data creation plan specifying our analyses if you contact the corresponding author and in turn you can use the information in the data creation plan to run the same or follow-up analyses. A list of all datasets used is available in the paper. All billing codes used are listed in the Supporting information files.",Method,Yes,Yes,Online,"https://www.ices.on.ca/, https://www.ices.on.ca/DAS/Public-Sector",N/A,Institute for Clinical Evaluative Sciences (ICES),DA|Method,Yes,Yes,Online,Yes,10.2196/preprints.29396,07/04/2021,http://dx.doi.org/10.2196/preprints.29396,Journal of Medical Internet Research
03/08/2020,2020,10.1371/journal.pntd.0008506,"Population biology,Medicine and health sciences,Organisms,Eukaryota,Evolutionary biology,People and places,Geographical locations,Parasite groups,Asia,Protozoans,Biology and life sciences,Tropical diseases,Malarial parasites,Genomics,Parasitic diseases,Plasmodium,Parasitic protozoans,Parasitology,Population genetics,Single nucleotide polymorphisms,Medical conditions,Thailand,Malaria,Cambodia,Apicomplexa,Genetics",United States of America,Sequencing results from this study are publicly available in the NCBI Sequence Read Archive within BioProject PRJNA603279.,Method,Yes,Yes,Supplementary Information|Online,N/A,PRJNA603279,NCBI Bioproject,Method,Yes,No,N/A,No,NA,NA,NA,NA
14/06/2019,2019,10.1371/journal.pone.0218171,"Cancer treatment,Oncology,Biology and life sciences,Radiation therapy,Surgical and invasive medical procedures,Radiation,Medicine and health sciences,Endocrine tumors,Cancers and neoplasms,Population biology,Clinical medicine,Anatomy,Physical sciences,Population metrics,Death rates,Thyroid carcinomas,Endocrine system,Carcinomas,Nuclear physics,Thyroid,Thymic tumors,Clinical oncology,Differentiated tumors,Physics,Lung and intrathoracic tumors",China,All relevant data are within the manuscript.,Method,Yes,No,N/A,N/A,N/A,N/A,N/A,No,No,N/A,No,NA,NA,NA,NA
05/05/2022,2022,10.1371/journal.pone.0268079,"Social sciences,Medical conditions,Infectious diseases,Psychology,Research design,Ethnicities,Survey research,Population groupings,Questionnaires,Emotions,Epidemiology,Pandemics,Italian people,Research and analysis methods,Quarantines,Biology and life sciences,Public and occupational health,Viral diseases,European people,Behavioral and social aspects of health,People and places,Disabilities,COVID 19,Medicine and health sciences",Italy,"All raw data are available from the following database: Federici, S., Lepri, A., Castellani Mencarelli, A., Zingone, E., De Leonibus, R., Acocella, A. M., & Giammaria, A. (2022). Raw data about the sexual experience of Italian adults during the COVID-19 lockdown. Researchgate.net. https://doi.org/10.13140/RG.2.2.13355.36640.",Method,Yes,Yes,Online,"10.13140/RG.2.2.13355.36640, https://doi.org/10.13140/RG.2.2.13355.36640",N/A,N/A,N/A,No,No,N/A,Yes,10.31234/osf.io/s9muj,01/06/2021,http://dx.doi.org/10.31234/osf.io/s9muj,PsyArXiv
10/04/2019,2019,10.1371/journal.pone.0214797,"Deserts,Vitamin D,Vitamin D deficiency,Organic compounds,Vitamins,Medicine and health sciences,Terrestrial environments,Dust,Chemistry,Plant science,Micronutrient deficiencies,Women's health,Organic chemistry,Biology and life sciences,Nutrition,Pollen,Physical sciences,Chemical compounds,Plant anatomy,Ecology and environmental sciences,Spring,Earth sciences,Maternal health,Materials science,Materials,Seasons,Obstetrics and gynecology,Nutritional deficiencies,Ecosystems,Pregnancy,Ecology",Japan,"Data are unsuitable for public deposition due to ethical restrictions and legal framework of Japan. It is prohibited by the Act on the Protection of Personal Information (Act No. 57 of 30 May 2003, amendment on 9 September 2015) to publicly deposit the data containing personal information. Ethical Guidelines for Epidemiological Research enforced by the Japan Ministry of Education, Culture, Sports, Science and Technology and the Ministry of Health, Labour and Welfare also restricts the open sharing of the epidemiologic data. All inquiries about access to data should be sent to: jecs-en@nies.go.jp. The person responsible for handling enquiries sent to this e-mail address is Dr Shoji F. Nakayama, JECS Programme Office, National Institute for Environmental Studies.",Method,Yes,No,N/A,N/A,N/A,N/A,Method,Yes,No,N/A,No,NA,NA,NA,NA
24/05/2021,2021,10.1371/journal.pone.0251348,"Physical sciences,Mathematics,Medicine and health sciences,Statistics,Biochemistry,Research and analysis methods,Statistical methods,Metaanalysis,Population biology,Pulmonology,Research assessment,Mathematical and statistical techniques,Biology and life sciences,Medical risk factors,Pulmonary function,Death rates,Database and informatics methods,Epidemiology,Database searching,Systematic reviews,Population metrics,Chronic obstructive pulmonary disease,Biomarkers",China,All relevant data are within the manuscript and its Supporting Information files.,Method,Yes,No,N/A,N/A,N/A,N/A,N/A,No,No,N/A,No,NA,NA,NA,NA
01/12/2020,2020,10.1371/journal.pone.0242973,"Anatomy,Bone density,Skeleton,Diagnostic medicine,Imaging techniques,Bone,Cellular types,Elderly,Diagnostic radiology,Medicine and health sciences,Biology and life sciences,Population groupings,Adults,People and places,Cell biology,Biomechanics,Young adults,Body limbs,Musculoskeletal mechanics,Biological tissue,Animal cells,Muscle fibers,Age groups,Bioassays and physiological analysis,Magnetic resonance imaging,Muscle physiology,Muscle analysis,Musculoskeletal system,Connective tissue,Research and analysis methods,Radiology and imaging,Physiology,Muscles",INSIGNEO Institute for,The data underlying this study are available on Figshare (https://doi.org/10.15131/shef.data.9934055.v1).,Method,Yes,Yes,Supplementary Information|Online,"10.15131/shef.data.9934055.v1, https://doi.org/10.15131/shef.data.9934055.v1",N/A,The University of Sheffield Online Research Data,Method,Yes,No,N/A,No,NA,NA,NA,NA
27/07/2021,2021,10.1371/journal.pone.0255253,"Imaging techniques,Surgical and invasive medical procedures,Medical risk factors,Lipids,Neuroscience,Signs and symptoms,Clinical medicine,Radiology and imaging,Tomography,Appendicitis,Immune response,Diagnostic radiology,Immunology,Neuroimaging,Medicine and health sciences,Research and analysis methods,Fats,Inflammation,Computed axial tomography,Gastroenterology and hepatology,Proteins,C-reactive proteins,Biology and life sciences,Diagnostic medicine,Epidemiology,Abscesses,Biochemistry",Japan,Original full data cannot be shared publicly because of containing detailed surgical information like precise surgical date. This information may indicate the patients' information. Data after being anonymized are available from the Sada Hospital Institutional Review Board (contact via e-mail; info@sada.or.jp) for researchers who meet the criteria for access to confidential data.,Method,Yes,No,N/A,N/A,N/A,N/A,Method,Yes,No,N/A,No,NA,NA,NA,NA
12/02/2020,2020,10.1371/journal.pone.0223201,"Chemical compounds,Physical sciences,Organic chemistry,Materials physics,Talc,Xylenes,Density,Cellulose,Physics,Minerals,Mannitol,Materials science,Materials,Organic compounds,Classical mechanics,Alcohols,Earth sciences,Chemistry,Material properties,Damage mechanics,Deformation,Powders,Compression,Mineralogy,Hydrocarbons",Pakistan,All relevant data are within the manuscript and its Supporting Information files.,Method,Yes,Yes,Supplementary Information,N/A,N/A,N/A,Method,Yes,No,N/A,Yes,10.1101/773671,20/09/2019,http://dx.doi.org/10.1101/773671,bioRxiv
29/11/2021,2021,10.1371/journal.ppat.1010114,"Eukaryota,Protozoans,Immunology,Medical conditions,Biology and life sciences,T cells,Parasitic protozoans,Infectious diseases,Molecular biology,Parasitology,Medicine and health sciences,Blood cells,Model organisms,Organisms,Cellular types,Cytotoxic T cells,Mouse models,Cloning,Malarial parasites,Animal models,Immune cells,Parasitic diseases,Molecular biology techniques,Animal studies,Respiratory infections,Cell biology,Research and analysis methods,White blood cells,Pulmonology,Animal cells,Experimental organism systems,Apicomplexa,Parasite groups,Plasmodium,Respiratory disorders",Belgium,All relevant data are within the manuscript and its Supporting Information files.,Method,Yes,Yes,Supplementary Information,N/A,N/A,N/A,N/A,No,No,N/A,No,NA,NA,NA,NA
17/06/2021,2021,10.1371/journal.pone.0252548,"Physiological processes,Water resources,Nutritional deficiencies,Chemistry,Chemical elements,Physiology,Families,People and places,Earth sciences,Children,Food,Urban geography,Physical sciences,Iodine,Geographic areas,Ecology and environmental sciences,Population groupings,Geography,Nutrition,Urban areas,Birth weight,Age groups,Excretion,Medicine and health sciences,Social sciences,Micronutrient deficiencies,Biology and life sciences,Human geography,Body weight,Diet,Natural resources,Physiological parameters",Sri Lanka,All relevant data are within the manuscript.,Method,Yes,No,N/A,N/A,N/A,N/A,N/A,No,No,N/A,No,NA,NA,NA,NA
04/03/2022,2022,10.1371/journal.pone.0264287,"Jobs,Pandemics,Epidemiology,Population groupings,Qualitative studies,Medical conditions,Health care providers,Medical personnel,Research design,Professions,Health care,Intensive care units,Research and analysis methods,Hospitals,Economics,Medicine and health sciences,COVID 19,Labor economics,Nurses,Health care facilities,Employment,Viral diseases,Medical risk factors,Infectious diseases,People and places,Social sciences",France,All relevant data are within the manuscript and its Supporting Information files.,Method,Yes,No,N/A,N/A,N/A,N/A,Method,Yes,No,N/A,No,NA,NA,NA,NA
01/08/2022,2022,10.1371/journal.pone.0272336,"Computed axial tomography,3D printing,Diagnostic medicine,Biology and life sciences,Radiology and imaging,Diagnostic radiology,Animals,Neuroanatomy,Amniotes,Mammals,Pets and companion animals,Organisms,Eukaryota,Spinal cord,Surgical and invasive medical procedures,Neuroimaging,Anatomy,Vertebrates,Research and analysis methods,Musculoskeletal system,Neuroscience,Nervous system,Zoology,Tomography,Medicine and health sciences,Electronics engineering,Bone imaging,Spine,Dogs,Engineering and technology,Skeleton,Imaging techniques,Vertebrae",South Korea,All relevant data are within the paper and its Supporting Information files.,Method,Yes,Yes,Supplementary Information,N/A,N/A,N/A,Method,Yes,No,N/A,No,NA,NA,NA,NA
29/04/2021,2021,10.1371/journal.pone.0236684,"Imaging techniques,Cellular types,Mammals,Medicine and health sciences,Somatosensory cortex,Organisms,Eukaryota,Body limbs,Zoology,Anatomy,Cell biology,Vertebrates,Cellular neuroscience,Brain,Biology and life sciences,Neurons,Cognitive psychology,Social sciences,Psychology,Sensory perception,Neuroscience,Cognitive science,Neural networks,Computer and information sciences,Animal cells,Neuroimaging,Perception,Amniotes,Rodents,Research and analysis methods,In vivo imaging,Animals",Canada,The data underlying the results presented in the study are available from https://osf.io/rhfqy/.,Method,Yes,Yes,Online,https://osf.io/rhfqy/,N/A,Open Science Framework,Method,Yes,No,N/A,Yes,10.1101/2020.07.14.202101,15/07/2020,http://dx.doi.org/10.1101/2020.07.14.202101,bioRxiv
13/03/2020,2020,10.1371/journal.pgen.1008647,"Genetics,Genomics,Medicine and health sciences,Animal studies,Invertebrates,X-linked traits,Animal genomics,Drosophila melanogaster,Guide RNA,Biochemistry,Invertebrate genomics,RNA,Research and analysis methods,DNA repair,Repeated sequences,X chromosomes,Biology and life sciences,Sex linkage,Heredity,Developmental biology,Chromosome biology,Sex chromosomes,DNA,Eukaryota,Organisms,Drosophila,Embryology,Chromosomes,Animals,Cell biology,Insects,Arthropoda,Experimental organism systems,Animal models,Embryos,Clinical genetics,Model organisms,Genetic linkage,Nucleic acids",Israel,All relevant data are within the manuscript and its Supporting Information files.,Method,Yes,Yes,Supplementary Information,N/A,N/A,N/A,N/A,No,No,N/A,Yes,10.1101/834630,08/11/2019,http://dx.doi.org/10.1101/834630,bioRxiv
14/04/2022,2022,10.1371/journal.ppat.1010400,"Genetics,Viral persistence and latency,Cellular types,Medicine and health sciences,Biology and life sciences,Medical microbiology,Epstein-Barr virus,Lamins,Viral pathogens,B cells,Gene regulation,Chromosome biology,Cell biology,Cytoskeletal proteins,Pathology and laboratory medicine,Immunology,Blood cells,Chromatin,Organisms,Epigenetics,Animal cells,White blood cells,Viruses,Immune cells,Pathogens,DNA viruses,Gene expression,Genomics,Virology,Microbial pathogens,Microbiology,Antibody-producing cells,Proteins,Biochemistry,Herpesviruses",United States of America,The authors confirm that all the data underlying the findings are fully available without restrictions in the Gene Expression Omnibus data repository under the following accession number: GSE198954 (ChIp-seq datasets) GSE181012 (RNA-seq datasets) GSE198413 (Hi-C datasets).,Method,Yes,Yes,Supplementary Information|Online,N/A,GSE198954,Gene Expression Omnibus,Method,Yes,No,N/A,Yes,10.1101/2021.08.05.455214,06/08/2021,http://dx.doi.org/10.1101/2021.08.05.455214,bioRxiv
10/12/2020,2020,10.1371/journal.pone.0243527,"Geographical locations,Viral diseases,Biology and life sciences,People and places,COVID 19,Physiological processes,Epidemiology,Dyssomnias,Sleep,Insomnia,Mental health and psychiatry,India,Depression,Physiology,Medicine and health sciences,Mood disorders,Infectious diseases,Medical risk factors,Neurology,Medical conditions,Sleep disorders,Asia,Pandemics",United States of America,The minimal anonymized dataset is uploaded to GitHub: (https://github.com/sahilbajaj-btnrh/COVID_PLOS_ONE.git).,Method,Yes,Yes,Online,https://github.com/sahilbajaj-btnrh/COVID_PLOS_ONE.git,N/A,Github,N/A,No,Yes,Online,No,NA,NA,NA,NA
09/05/2019,2019,10.1371/journal.pgen.1008124,"Heredity,Genetics,Human families,Random variables,Agriculture,Probability theory,Medicine and health sciences,Biology and life sciences,Genetic epidemiology,Plant breeding,Animal studies,Epidemiology,Social sciences,Agronomy,Epistasis,Mathematics,Human genetics,Covariance,Research and analysis methods,Sociology,Physical sciences",United States of America,The data studied in this paper is freely available to download from the following URL: http://familinx.org/. The Sci-LMM software code is available from the following URL: https://github.com/TalShor/SciLMM.,Method,Yes,Yes,Online,"http://familinx.org/, https://github.com/TalShor/SciLMM",N/A,"Github, familinx.org",DA|Method|Supplementary,Yes,Yes,Online,Yes,10.1101/256396,31/01/2018,http://dx.doi.org/10.1101/256396,bioRxiv
11/09/2019,2019,10.1371/journal.pone.0222410,"Monosaccharides,Estradiol,Biology and life sciences,Hormones,Lipid hormones,Metabolic disorders,Genetics,Organisms,Animals,Glucose,Biochemistry,Testosterone,Research and analysis methods,Medicine and health sciences,Endocrine disorders,Amniotes,Antioxidants,Eukaryota,Cell biology,Vertebrates,Physical sciences,Rodents,Mammals,Diabetes mellitus,Androgens,Chemistry,Animal models,Chemical compounds,Animal studies,Organic compounds,Experimental organism systems,Carbohydrates,Model organisms,Rats,Endocrinology,Gene expression,Oxidative stress,Organic chemistry",Egypt,All relevant data are within the manuscript and its Supporting Information files.,Method,Yes,Yes,N/A,N/A,N/A,N/A,N/A,No,No,N/A,No,NA,NA,NA,NA
29/07/2020,2020,10.1371/journal.pone.0236790,"People and places,Geographical locations,Africa,Community ecology,Population dynamics,Ecology and environmental sciences,Population biology,Ecology,Trophic interactions,Age groups,Animal behavior,Sex ratio,Population growth,Zoology,Behavior,Population groupings,Predation,Psychology,Population size,Animal sociality,Biology and life sciences,Population metrics,Social sciences,South Africa",South Africa,All relevant data are within the manuscript and its Supporting Information files.,Method,Yes,No,N/A,N/A,N/A,N/A,Method,Yes,No,N/A,No,NA,NA,NA,NA
09/05/2019,2019,10.1371/journal.pone.0216713,"Extraction techniques,RNA extraction,DNA,Molecular biology,Bioinformatics,Biochemistry,Vegetables,Potato,Genetics,Nucleic acids,Research and analysis methods,RNA sequence analysis,Viral genomics,Plants,Molecular biology techniques,Virology,Genomic libraries,Biology and life sciences,Complementary DNA,RNA viruses,Database and informatics methods,Microbiology,cDNA libraries,Genomics,Microbial genomics,DNA libraries,Forms of DNA,Organisms,Eukaryota,Solanum,Sequence analysis,RNA sequencing,Viruses,Computational biology,Genome analysis,Sequencing techniques",Germany,All relevant data are within the manuscript.,Method,Yes,Yes,Online,https://www.eppo.int/QUARANTINE/listA1.htm,N/A,N/A,N/A,No,No,N/A,No,NA,NA,NA,NA
17/09/2019,2019,10.1371/journal.pcbi.1007353,"Transcriptional control,Epigenetics,Gene expression,Gene types,Gene regulation,DNA-binding proteins,Proteins,Histones,Chromosome biology,Nucleosomes,Cell biology,Regulator genes,Genetics,Biology and life sciences,Biochemistry,Chromatin",United States of America,All relevant data are within the manuscript and its Supporting Information files.,Method,Yes,Yes,Supplementary Information,N/A,N/A,N/A,Method,Yes,No,N/A,Yes,10.1101/390419,13/08/2018,http://dx.doi.org/10.1101/390419,bioRxiv
03/03/2022,2022,10.1371/journal.pclm.0000012,"Medicine and health sciences,Health care,Health services administration and management,Health systems strengthening,Health care policy,Earth sciences,Hydrology,Epidemiology,Climatology,Atmospheric science,Climate change,Global health,Engineering and technology,Civil engineering,Urban infrastructure,Flooding,Public and occupational health,Medical risk factors",United States of America,"The initial pool of cities was based on previous published research, available from: doi: 10.1016/j.envres.2020.110435. These findings were based on city climate adaptation actions data publicly available in the CDP 2018 Cities Adaptation Actions Database available from: https://data.cdp.net/browse?category=Adaptation%20Actions. All climate adaptation plans analyzed in this study are publicly available online; links are provided in S1 Table. The full data analysis for this study is detailed in S1â€“S3 Tables.",Method,Yes,Yes,Online,"https://data.cdp.net/browse?category=Adaptation%20Actions, 10.1016/j.envres.2020.110435",N/A,N/A,N/A,No,No,N/A,No,NA,NA,NA,NA
03/05/2021,2021,10.1371/journal.pone.0250641,"Oncology,Leukemia,Social media,Hematologic cancers and related disorders,Prostate diseases,Lung and intrathoracic tumors,Sociology,Social networks,Social communication,Social sciences,Medicine and health sciences,Network analysis,Health care,Communication in health care,Prostate cancer,Hematology,Computer and information sciences,Communications,Cancers and neoplasms,Urology,Genitourinary tract tumors",Australia,"The data underlying the results are available from Instagram (www.instagram.com). The coding framework to generated the results are published in the paper, but the data cannot be shared publicly as they contain personal information. Additional information about our ethics or data requests/availability can be addressed by the corresponding author or directly to the ethics committee at: Monash University Human Research Ethics Committee Executive Officer Human Ethics, Dr Souheir Houssami Email: muhrec@monash.edu Phone: +61 3 990 52052.",Method,Yes,Yes,Online,www.instagram.com,N/A,N/A,N/A,No,No,N/A,No,NA,NA,NA,NA
03/05/2022,2022,10.1371/journal.pone.0267888,"Biology and life sciences,Anthropometry,Public and occupational health,Physical activity,Anatomy,Cardiovascular anatomy,Rehabilitation medicine,Cardiology,Heart,Cardiac rehabilitation,Heart rate,Myocardial infarction,Sports and exercise medicine,Electrocardiography,Bioassays and physiological analysis,Medicine and health sciences,Electrophysiological techniques,Exercise,Sports science,Cardiac ventricles,Strength training,Cardiac electrophysiology,Research and analysis methods,Physical fitness",Israel,All relevant data are within the paper and its Supporting information files.,Method,Yes,Yes,Supplementary Information,N/A,N/A,N/A,Method,Yes,No,N/A,No,NA,NA,NA,NA
05/02/2020,2020,10.1371/journal.pone.0228770,"Medicine and health sciences,Aquatic environments,Sociology,People and places,Lakes,Geographical locations,Bodies of water,Hematology,Freshwater environments,Earth sciences,Tropical diseases,Intestinal schistosomiasis,Parasitic diseases,Helminth infections,Social sciences,Schistosomiasis,Population groupings,Education,Ecology and environmental sciences,Tanzania,Neglected tropical diseases,Africa,Marine and aquatic sciences,Malaria,Age groups,Families,Schools,Anemia,Children",Sweden,All relevant data underlying the results presented in this study are contained within the paper.,Method,Yes,No,N/A,N/A,N/A,N/A,N/A,No,No,N/A,No,NA,NA,NA,NA
18/06/2019,2019,10.1371/journal.pone.0217102,"Maternal health,Medicine and health sciences,People and places,Sociology,Research and analysis methods,Health care providers,Social systems,Pregnancy,Geographical locations,Research design,Health care,Social sciences,Malawi,Depression,Mental health and psychiatry,Mood disorders,Allied health care professionals,Women's health,Qualitative studies,Africa,Obstetrics and gynecology",Malawi,All relevant data are within the manuscript and its Supporting Information files.,Method,Yes,Yes,Supplementary Information,N/A,N/A,N/A,Method,Yes,No,N/A,No,NA,NA,NA,NA
11/03/2021,2021,10.1371/journal.pone.0248188,"Cancer treatment,Breast tumors,Prostate cancer,Chemical compounds,Cancers and neoplasms,Osteoporosis,Genitourinary tract tumors,Connective tissue diseases,Critical care and emergency medicine,Medicine and health sciences,Gastrointestinal cancers,Urology,Medical risk factors,Chemistry,Bone fracture,Breast cancer,Steroids,Prostate diseases,Organic compounds,Oncology,Cancer risk factors,Organic chemistry,Trauma medicine,Physical sciences,Rheumatology,Traumatic injury,Gastroenterology and hepatology,Epidemiology",Japan,"Data are available from the ACC Institutional Data Access / Ethics Committee (contact ortho_tiken@aichi-cc.jp, irb@aichi-cc.jp) for researchers who meet the criteria for access to confidential data.",Method,Yes,Yes,Supplementary Information,N/A,N/A,N/A,N/A,No,No,N/A,No,NA,NA,NA,NA
27/09/2021,2021,10.1371/journal.pone.0256837,"Geographical locations,Biology and life sciences,Computer and information sciences,Social sciences,Indonesia,People and places,Political science,Oceania,Computer networks,Species interactions,Symbiosis,Ecology and environmental sciences,Internet,Industrial engineering,Engineering and technology,Economics,Asia,Public policy,Ecology,Industrial ecology,China",China,All relevant data are within the paper and its Supporting Information files.,Fulltext,Yes,No,N/A,N/A,N/A,N/A,N/A,No,No,N/A,No,NA,NA,NA,NA
16/07/2020,2020,10.1371/journal.pone.0236122,"Inpatients,Radiation therapy,Hospitals,Surgical excision,Patients,Proteins,Respiratory system procedures,Hemoglobin,Serum albumin,Surgical and invasive medical procedures,Total laryngectomy,Health care,Clinical oncology,Laryngectomy,Albumins,Oncology,Biochemistry,Cancer treatment,Biology and life sciences,Clinical medicine,Medicine and health sciences,Health care facilities",Taiwan,"All relevant data are within the manuscript and its Supporting Information files. And All relevant data are held in Figshare, a public repository. https://doi.org/10.6084/m9.figshare.12568565.v1",Method,Yes,Yes,Supplementary Information|Online,"https://doi.org/10.6084/m9.figshare.12568565.v1, 10.6084/m9.figshare.12568565.v1",N/A,figshare,N/A,No,No,N/A,No,NA,NA,NA,NA
15/08/2019,2019,10.1371/journal.pone.0220877,"Olives,Vegetable oils,Biochemistry,Diet,Agronomy,Crop science,Biology and life sciences,Carbohydrate metabolism,Soybean,Plants,Diabetic endocrinology,Fatty acids,Nutrition,Fats,Hormones,Crops,Eukaryota,Metabolism,Organisms,Lipids,Glucose metabolism,Fruits,Plant products,Agriculture,Insulin,Medicine and health sciences,Endocrinology",Malaysia,All relevant data are within the manuscript and its Supporting Information files.,Method,Yes,No,N/A,N/A,N/A,N/A,Method,Yes,No,N/A,No,NA,NA,NA,NA
08/04/2021,2021,10.1371/journal.pone.0249924,"Biology and life sciences,Organic chemistry,Body weight,Physiology,Glucose,Anatomy,Endocrine system,Chemistry,Connective tissue,Organic compounds,Thyroid-stimulating hormone,Chemical compounds,Biochemistry,Neuroanatomy,Hormones,Monosaccharides,Nutrition,Nutrients,Physical sciences,Peptide hormones,Carbohydrates,Growth hormone,Biological tissue,Diet,Neuroscience,Medicine and health sciences,Physiological parameters,Pituitary gland,Nervous system,Adipose tissue",United States of America,All relevant data are within the manuscript and its Supporting information files.,Method,Yes,Yes,Supplementary Information,N/A,N/A,N/A,Method,Yes,No,N/A,No,NA,NA,NA,NA
14/03/2019,2019,10.1371/journal.pcbi.1006894,"Physical chemistry,Cell biology,Hyperpolarization,Physiology,Electrophysiology,Permeability,Cellular structures and organelles,Materials science,Cell membranes,Biology and life sciences,Membrane potential,Medicine and health sciences,Physical sciences,Material properties,Ions,Cations,Anions,Intracellular membranes,Chemistry",United States of America,"All data used are computational data and are in the manuscript. These data can be reproduced by any reader by running the program that we are making available (https://sites.northwestern.edu/ralcomputational/), and using the parameters that we give in detail in all figure legends.",Method,Yes,Yes,Online,https://sites.northwestern.edu/ralcomputational/,N/A,N/A,Method,Yes,Yes,Online,No,NA,NA,NA,NA
27/01/2022,2022,10.1371/journal.pone.0262608,"Steroid therapy,Biology and life sciences,Population metrics,Ferritin,Protein complexes,COVID 19,Medicine and health sciences,Medical conditions,Pharmaceutics,Viral diseases,Drug administration,Corticosteroid therapy,C-reactive proteins,Lipid hormones,Biochemistry,Steroid hormones,Drug therapy,Infectious diseases,Cortisol,Death rates,Proteins,Population biology,Hormones",Pakistan,"Data files are deposited to a stable, public repository. DOI is provided as follows: Nasir, Nosheen (2021), ""Deidentified data"", Mendeley Data, V1, doi: 10.17632/wh44wh544p.1.",Method,Yes,Yes,Online,10.17632/wh44wh544p.1,N/A,Mendeley Data,Method,Yes,No,N/A,No,NA,NA,NA,NA
27/08/2019,2019,10.1371/journal.pone.0221323,"Asia,Elderly,People and places,Geriatrics,Mental health and psychiatry,Geographical locations,Psychology,Korea,Economics,Research assessment,Research validity,Social sciences,Employment,Education,Sociology,Medicine and health sciences,Mood disorders,Depression,Schools,Labor economics,Biology and life sciences,Psychological stress,Population groupings,Research and analysis methods,Age groups",South Korea,All relevant data are within the paper and its Supporting Information files.,Method,Yes,Yes,Supplementary Information|Online,"https://figshare.com/s/960e125ab939b19d8111, 10.6084/m9.figshare.7212485",N/A,figshare,Method,Yes,No,N/A,Yes,10.20944/preprints201709.0075.v1,21/09/2017,http://dx.doi.org/10.20944/preprints201709.0075.v1,Preprints.org
25/01/2021,2021,10.1371/journal.pntd.0009110,"Malaria,Apicomplexa,Macaca fascicularis,Animals,Old World monkeys,Parasitology,Ecosystems,Plasmodium,Vertebrates,Amniotes,Geographical locations,Singapore,Parasitic protozoans,Malarial parasites,Ecology and environmental sciences,Asia,Primates,Zoology,Parasitic diseases,Macaque,Terrestrial environments,Organisms,Parasite groups,Mammals,Medical conditions,Monkeys,People and places,Tropical diseases,Ecology,Biology and life sciences,Forests,Medicine and health sciences,Protozoans,Eukaryota",Singapore,All relevant data are within the manuscript and its Supporting Information files.,Method,Yes,No,N/A,N/A,N/A,N/A,N/A,No,No,N/A,No,NA,NA,NA,NA
26/09/2019,2019,10.1371/journal.pone.0222672,"Hypertension,Genetics,Vascular medicine,Cardiovascular diseases,Medicine and health sciences,Biology and life sciences,Genetics of disease,Computer and information sciences,Cardiovascular medicine,Blood pressure,Network analysis,Genetic predisposition,Human genetics,Genetic networks,Preeclampsia,Pregnancy,Maternal health,Women's health,Computational biology,Gene regulatory networks,Pregnancy complications,Obstetrics and gynecology,Gene identification and analysis",United States of America,All relevant data are available from the Open Science Framework at https://osf.io/ecpw6//.,Method,Yes,Yes,Supplementary Information|Online,https://osf.io/ecpw6//,N/A,Open Science Framework,N/A,No,No,N/A,Yes,10.1101/659797,04/06/2019,http://dx.doi.org/10.1101/659797,bioRxiv
13/06/2019,2019,10.1371/journal.pone.0217067,"Computer and information sciences,Geometry,Euclidean geometry,Research and analysis methods,Mixtures,Algebra,Cloud computing,Materials,Cryptography,Encryption,Computational geometry,Materials science,Algorithms,Physical sciences,Computing methods,Simulation and modeling,Applied mathematics,Polynomials,Mathematics",China,All relevant data are within the manuscript and its Supporting Information files.,Fulltext,Yes,No,N/A,N/A,N/A,N/A,N/A,No,No,N/A,No,NA,NA,NA,NA
20/06/2019,2019,10.1371/journal.pone.0215804,"Canada,Medical personnel,Disabilities,Public and occupational health,Health care providers,Mental health and psychiatry,Medicine and health sciences,Population groupings,Adults,Medical doctors,Geographical locations,Ontario,Critical care and emergency medicine,Health services research,North America,Professions,People and places,Age groups,Health care,Physicians",Canada,"The dataset from this study is held securely in coded form at the Institute for Clinical Evaluative Sciences (ICES). The authors accessed the data set used for this study in a manner that is different from the manner by which individuals who are external to ICES would access the data set. The authors are affiliated with ICES, either directly or as collaborating agents of ICES, and conducted the study in fulfillment of ICESâ€™ mandate as a prescribed entity under Ontarioâ€™s Personal Health Information Protection Act. As a result, the authors were authorized, both legally and contractually, to access the data set in a more granular form than individuals who are external to ICES would be permitted to access the data set. External individuals must apply for access to the minimal data to das@ices.on.ca through ICESâ€™ Data and Analytic Services (das@ices.on.ca), a division of ICES established specifically to provide data and analytic services to third party researchers. External individuals will also need to request permission from Immigration, Refugees and Citizenship Canada to access to their dataset, which was germane to this research. The data set that approved third party researchers would be permitted to access will be adjusted to ensure the risk of re-identification of any underlying individuals is low. The analytic code is not necessary to replicate the study results because the specific diagnostic codes and definitions of study groups are listed in the appendix, and other necessary details are provided in the methods section. However, third party researchers who wish to replicate the results may still request the analytic code from the authors.",Method,Yes,Yes,Supplementary Information,N/A,N/A,N/A,DA|Method|Supplementary,Yes,Yes,Supplementary Information,No,NA,NA,NA,NA
07/12/2021,2021,10.1371/journal.pone.0259341,"Governments,Neuromuscular diseases,Military medicine,Armed forces,Military personnel,Political science,Chronic fatigue syndrome,Veterans,Rheumatology,Headaches,Health care,Medical conditions,Gulf War syndrome,Clinical medicine,Social sciences,Veteran care,Migraine,Signs and symptoms,Neurology,Irritable bowel syndrome,Medicine and health sciences,Mental health and psychiatry,Fibromyalgia",United States of America,The data that support the findings of this study are available from the Veterans Affairs. Restrictions apply to the availability of these data. The data is sensitive and VA regulations require approval before making data accessible. Data are however available from the authors upon reasonable request and with permission of Veterans Affairs. Interested parties can contact the corresponding author or the research office at the VA NJHCS at 973-676-1000 x202220 or Carmelen.Chiusano@va.gov.,Method,Yes,No,N/A,N/A,N/A,N/A,N/A,No,No,N/A,No,NA,NA,NA,NA
01/06/2021,2021,10.1371/journal.ppat.1009596,"Research and analysis methods,Togaviruses,Evolutionary biology,Data management,Microbial mutation,Microbial pathogens,SARS CoV 2,Pathology and laboratory medicine,Taxonomy,Genomics,Medical microbiology,Microbiology,Microbial genomics,Database and informatics methods,Computer and information sciences,Pathogens,Evolutionary systematics,Biology and life sciences,Virology,Bioinformatics,Coronaviruses,Genetics,Phylogenetic analysis,Phylogenetics,Viruses,Viral pathogens,RNA viruses,Viral genomics,Sequence analysis,Sequence alignment,SARS coronavirus,Organisms,Medicine and health sciences,Rubella virus",United Kingdom,All relevant data are within the manuscript and its Supporting Information files.,Method,Yes,Yes,Supplementary Information,N/A,N/A,N/A,N/A,No,No,N/A,Yes,10.1101/2021.02.09.430395,10/02/2021,http://dx.doi.org/10.1101/2021.02.09.430395,bioRxiv
12/10/2021,2021,10.1371/journal.pone.0258417,"Health care,Housing,Sleep,Earth sciences,Survey research,Neuroscience,Social psychology,Medical risk factors,Biology and life sciences,Cognitive science,Geography,Physiology,Cognitive psychology,Research design,Psychology,Human geography,Social sciences,Research and analysis methods,Surveys,Emotions,Medicine and health sciences,Psychological and psychosocial issues,Physiological processes,Epidemiology",Germany,"Data cannot be shared publicly because of restrictions on their use by the third party data custodians. Data are available from the custodians for researchers who meet the criteria for access to confidential data. Our study uses third party data from the Journeys Home Survey and the Household, Income and Labour Dynamics in Australia (HILDA) Survey. Data from the Journeys Home Survey is available for purchase under individual licensing arrangements with the Australian Governmentâ€™s Department of Social Services. For instructions on how to access the data, researchers should email JH@dss.gov.au. Further information is available at https://melbourneinstitute.unimelb.edu.au/journeys-home/for-researchers. Our study can be replicated using any of the data releases, including the International Release (we used the Limited Release). HILDA can be applied for at no cost to researchers through the National Centre for Longitudinal Data Dataverse. Instructions are available at https://dataverse.ada.edu.au/dataverse/hilda. We used the General Release 16; later releases should provide nearly identical results. We did not have special privileges to obtain the data and obtained our data through the process described above.",Fulltext,Yes,Yes,Supplementary Information|Online,"https://melbourneinstitute.unimelb.edu.au/journeys-home/for-researchers, https://dataverse.ada.edu.au/dataverse/hilda",N/A,N/A,N/A,No,No,N/A,No,NA,NA,NA,NA
04/09/2019,2019,10.1371/journal.pone.0212898,"Brain,Physical sciences,Computer and information sciences,Molecular biology techniques,Somatosensory cortex,Research and analysis methods,Gene expression,Signal transduction,Mathematics,Psychology,Animal cells,Genetics,Algorithms,Medicine and health sciences,Cellular types,Sensory receptors,Simulation and modeling,Gene mapping,Cellular neuroscience,Anatomy,Machine learning,Neurons,Cell biology,Artificial intelligence,Applied mathematics,Motor cortex,Sensory perception,Social sciences,Biology and life sciences,Molecular biology,Neuroscience",United States of America,"Coronal ISH data for 4345 genes obtained from the Allen Mouse Brain Atlas (http://mouse.brain-map.org/) at 200 Î¼m resolution in male, 56-day-old C57BL/6J mice at 25-Î¼m sections. Code to download and analyze data sets are supplied as Supporting Information.",Method,Yes,Yes,Online,http://mouse.brain-map.org/,N/A,N/A,DA|Method,Yes,Yes,Online,Yes,10.1101/549519,15/02/2019,http://dx.doi.org/10.1101/549519,bioRxiv
27/12/2019,2019,10.1371/journal.pone.0226903,"Cell biology,Chickens,Hepatocytes,Biochemistry,Physiology,Anatomy,Animal cells,Fats,Histology,Biology and life sciences,Liver,Fowl,Organisms,Amniotes,Gamefowl,Physiological parameters,Body weight,Lipids,Poultry,Cellular types,Birds,Eukaryota,Medicine and health sciences,Animals,Vertebrates",Germany,The data are all contained within the paper.,Method,Yes,No,N/A,N/A,N/A,N/A,Method,Yes,No,N/A,No,NA,NA,NA,NA
13/08/2021,2021,10.1371/journal.pone.0255559,"Biodiversity,Ecology and environmental sciences,Professions,Pilots,Computer and information sciences,Open source software,Engineering and technology,Science policy,Software engineering,Physics,Deforestation,Aerospace engineering,People and places,Ecology,Open science,Physical sciences,Environmental impacts,Flight testing,Aircraft,Dynamics,Classical mechanics,Biology and life sciences,Aerodynamics,Transportation,Population groupings,Computer software,Conservation science",United Kingdom,All relevant data are within the paper and its Supporting information files.,Method,Yes,Yes,Supplementary Information,N/A,N/A,N/A,Method,Yes,No,N/A,No,NA,NA,NA,NA
15/04/2019,2019,10.1371/journal.pone.0215241,"Medicine and health sciences,People and places,Organisms,Europe,Developmental biology,Animals,Molecular biology,Parasitic life cycles,Parasitic diseases,Germany,Geographical locations,Molecular biology techniques,Artificial gene amplification and extension,European Union,Research and analysis methods,Protozoan infections,Life cycles,Polymerase chain reaction,Biology and life sciences,Sporocysts,Vertebrates,Water resources,Eukaryota,Pigeons,Parasitology,Amniotes,Birds,Ecology and environmental sciences,Natural resources",Germany,All relevant data are within the manuscript.,Method,Yes,No,N/A,N/A,N/A,N/A,N/A,No,No,N/A,No,NA,NA,NA,NA
14/03/2022,2022,10.1371/journal.pgph.0000110,"Materials science,Pain management,Drugs,Vascular medicine,Tanzania,Social sciences,Materials,Geographical locations,Physical sciences,Endocrinology,Menstrual cycle,Reproductive physiology,Hemorrhage,Pain,Physiology,People and places,Endocrine physiology,Sociology,Africa,Menarche,Analgesics,Biology and life sciences,Schools,Clinical medicine,Medicine and health sciences,Pharmacology,Signs and symptoms,Natural materials,Education",United States of America,The data can be accessed through https://doi.org/10.3886/E160841V2.,Method,Yes,Yes,Supplementary Information|Online,"https://doi.org/10.3886/E160841V2, 10.3886/E160841V2",N/A,openICSPR,N/A,No,No,N/A,No,NA,NA,NA,NA
12/06/2019,2019,10.1371/journal.pone.0217583,"Stillbirths,Geographical locations,People and places,Sensory perception,Behavior,Women's health,New Zealand,Biology and life sciences,Oceania,Psychology,Cross-sectional studies,Research and analysis methods,Obstetrics and gynecology,Physiological processes,Research design,Physiology,Eating,Medicine and health sciences,Birth,Neuroscience,Pregnancy,Social sciences,Maternal health",New Zealand,"Due to ethical restrictions, data underlying the results presented in the study can not be shared publicly. Data will be available to approved researchers under the data-sharing arrangements provided by the Maternal and Perinatal Central Coordinating Research Hub (CCRH), based at the University of Auckland (https://wiki.auckland.ac.nz/researchhub). Metadata, along with instructions for data access, are available at the University of Aucklandâ€™s research data repository, Figshare (http://auckland.figshare.com/). Data access requests are to be submitted to the Data Access Committee via researchhub@auckland.ac.nz. De-identified data will be shared with researchers who provide a methodologically sound proposal and have appropriate institutional approval. Due to ethical restrictions, provision of data will be subject to receiving appropriate New Zealand ethical approval. Researchers must sign and adhere to a Data Access Agreement that includes a commitment to using the data only for the specified proposal, to refrain from any attempt to identify individual participants, to store data securely and to destroy or return the data after completion of the project. The CCRH reserves the right to cover the costs of making data available, if required. Contact Information for NZ Ethics Committee: Email: hdec@moh.govt.nz; Postal address: Ministry of Health, Health and Disability Ethics Committees, PO Box 5013, Wellington 6140, New Zealand; Attention: Ethics Committee manager for Protection, Regulation and Assurance.",Method,Yes,Yes,Online,"https://wiki.auckland.ac.nz/researchhub, http://auckland.figshare.com/",N/A,"figshare, wiki.auckland.ac.nz",Method,Yes,No,N/A,No,NA,NA,NA,NA
13/07/2022,2022,10.1371/journal.pone.0268481,"Diagnostic medicine,Vascular medicine,Cardiovascular medicine,Radiology and imaging,Young adults,Cerebrovascular diseases,Age groups,Cardiovascular disease risk,Cardiology,Angiography,Research and analysis methods,Pathology and laboratory medicine,Etiology,Population groupings,Atherosclerosis,Adults,People and places,Imaging techniques,Stroke,Cardiovascular imaging,Diagnostic radiology,Neurology,Cardiovascular diseases,Ischemic stroke,Medicine and health sciences,Medical conditions,Hematology",Japan,Data cannot be shared publicly because of the sensitive nature of the data collected for this study. Data are available from the Fukuoka Stroke Registry at Kyushu University (the Fukuoka Stroke Registry secretariat: fujino.chiyoko.957@m.kyushu-u.ac.jp) for researchers who meet the criteria for access to confidential data for purposes of reproducing the results or replicating the procedure.,Method,Yes,No,N/A,N/A,N/A,N/A,N/A,No,No,N/A,No,NA,NA,NA,NA
23/03/2021,2021,10.1371/journal.pone.0249072,"Mammals,Organisms,Eukaryota,Zoology,Conservation science,Ecosystems,Vertebrates,Domestic animals,Biology and life sciences,Ecological metrics,Ecology,Jaguars,Pumas,Predation,Ecology and environmental sciences,Terrestrial environments,Amniotes,Species diversity,Animals,Community ecology,Trophic interactions,Cats,Forests",United States of America,All main data are within the paper and its Supporting Information files. We have also ensured that our full data are now freely available on the senior authorâ€™s GitHub page (please see https://github.com/lisannepetracca/Salom_Perez_et_al_2021_PLOSOne).,Method,Yes,Yes,Supplementary Information|Online,https://github.com/lisannepetracca/Salom_Perez_et_al_2021_PLOSOne,N/A,Github,Method,Yes,Yes,Online,No,NA,NA,NA,NA
08/02/2019,2019,10.1371/journal.pone.0211969,"Imaging techniques,Mathematical and statistical techniques,Sarcomas,Statistics,Regression analysis,Computed axial tomography,Professions,Medicine and health sciences,Population groupings,Physics,Lesions,Research and analysis methods,Mathematics,Metastasis,Radiologists,Diagnostic medicine,Physical sciences,Signs and symptoms,Pathology and laboratory medicine,People and places,Entropy,Osteosarcoma,Diagnostic radiology,Statistical methods,Thermodynamics,Cancers and neoplasms,Pulmonary imaging,Basic cancer research,Neuroscience,Oncology,Tomography,Radiology and imaging,Neuroimaging,Medical personnel,Biology and life sciences",South Korea,All relevant data are within the manuscript and its Supporting Information files.,Method,Yes,No,N/A,N/A,N/A,N/A,N/A,No,No,N/A,No,NA,NA,NA,NA
13/09/2021,2021,10.1371/journal.pcbi.1009384,"Post-translational modification,Viral pathogens,Proteins,Pathology and laboratory medicine,Infectious diseases,Viral diseases,Viruses,Medical microbiology,Database and informatics methods,Sequence motif analysis,Enzymes,COVID 19,Enzymology,Medicine and health sciences,Pathogens,DNA-binding proteins,Enzyme inhibitors,Research and analysis methods,Sequence analysis,Biochemistry,SARS CoV 2,Microbiology,Microbial pathogens,Histones,SARS coronavirus,Transferases,Coronaviruses,Biology and life sciences,Medical conditions,Organisms,Phosphorylation,RNA viruses,Kinase inhibitors,Bioinformatics",India,"The raw data points for the graphs presented in Figs 5A, 6A, 6B and 6C; and the raw reads for the real-time PCR analysis are provided in the S1 Data file. The mass spectrometry raw data files are submitted to the OSF repository at- â€œhttps://osf.io/rt6aw/?view_only=815070ca377a4a6cb4aac2e56990152eâ€. The results for the multiple sequence alignment, structural alignment, structural fold searches and small molecule dockings are submitted to the OSF repository at- â€œhttps://osf.io/bvcq2/?view_only=1a002bc15cf94bb884df06bc7d7601bcâ€.",Method,Yes,Yes,Supplementary Information|Online,"https://osf.io/rt6aw/?view_only=815070ca377a4a6cb4aac2e56990152e, https://osf.io/bvcq2/?view_only=1a002bc15cf94bb884df06bc7d7601bc",N/A,Open Science Framework,Method,Yes,No,N/A,Yes,10.1101/2021.02.03.429510,04/02/2021,http://dx.doi.org/10.1101/2021.02.03.429510,bioRxiv
21/08/2020,2020,10.1371/journal.pone.0237819,"Fish,Earth sciences,Equipment,Organisms,Physical sciences,Eukaryota,Physics,Agriculture,Ecology and environmental sciences,Fisheries,Optical equipment,Marine fish,Marine and aquatic sciences,Aquaculture,Marine biology,Engineering and technology,Petrology,Animals,Biology and life sciences,Geology,Ecology,Tides,Habitats,Sediment,Geophysics,Ecosystems,Cameras,Zoology,Vertebrates,Marine ecosystems,Acoustics,Sedimentary geology",France,All relevant data are within the manuscript and its Supporting Information files.,Fulltext,Yes,Yes,Supplementary Information|Online,www.vidsync.org,N/A,N/A,N/A,No,No,N/A,No,NA,NA,NA,NA
11/02/2019,2019,10.1371/journal.pone.0211717,"Phylogenetics,Crustaceans,Population biology,Biogeography,Organisms,Non-coding RNA,RNA,Animals,Invertebrates,Geography,Phylogeography,Nucleic acids,Genetic mapping,Ecology and environmental sciences,Biology and life sciences,Bioinformatics,Forms of DNA,Mitochondrial DNA,DNA,Computer and information sciences,Phylogenetic analysis,Data management,Cellular structures and organelles,Evolutionary biology,Eukaryota,Crabs,Sequence analysis,Cell biology,Earth sciences,Haplotypes,Research and analysis methods,Genetics,Heredity,Arthropoda,Biochemistry,Sequence alignment,Ribosomes,Evolutionary systematics,Ribosomal RNA,Taxonomy,Database and informatics methods,Population genetics",Spain,All relevant data are within the manuscript and its Supporting Information files.,Method,Yes,No,N/A,N/A,N/A,N/A,Method,Yes,No,N/A,No,NA,NA,NA,NA
18/03/2021,2021,10.1371/journal.pone.0247157,"People and places,Education,Drug therapy,Oncology,Anti-addiction drug therapy,Medicine and health sciences,Schools,Cancer treatment,Sociology,Health education and awareness,Nicotine replacement therapy,Smoking habits,Biology and life sciences,Physical sciences,Europe,Statistical methods,Regression analysis,Mathematics,Statistics,Psychology,Pharmaceutics,Switzerland,Mathematical and statistical techniques,Research and analysis methods,Behavior,Social sciences,Geographical locations,Neurological drug therapy,Habits,Health care",Switzerland,"Data cannot be made completely publicly available for ethical and legal reasons. We are bound to the Federal Act on Data Protection (FADP, https://www.admin.ch/opc/en/classified-compilation/19920153/index.html) which aims to protect the privacy and the fundamental rights of persons when their data is processed. However, the FADP allows to share anonymized data. The data can be obtained by researchers from the FORSbase repository (Swiss Foundation for Research in Social Sciences) via the following URL, after first completing a user agreement: https://forsbase.unil.ch/project/study-public-overview/17392/0/ (DOI: 10.23662/FORS-DS-1252-1). The user agreement can be accessed here: https://forsbase.unil.ch/media/general_documentation/en/User_contract_E.pdf.",Method,Yes,Yes,Online,"https://www.admin.ch/opc/en/classified-compilation/19920153/index.html, https://forsbase.unil.ch/media/general_documentation/en/User_contract_E.pdf, 10.23662/FORS-DS-1252-1, https://forsbase.unil.ch/project/study-public-overview/17392/0/",N/A,N/A,N/A,No,No,N/A,No,NA,NA,NA,NA
02/02/2022,2022,10.1371/journal.pone.0262529,"Computer and information sciences,Age groups,Toddlers,Computer networks,Children,Internet,Families,Social sciences,Behavior,Parenting behavior,People and places,Biology and life sciences,Population groupings,Infants,Fathers,Linguistics,Semantics,Emotions,Psychology",Australia,"We draw on publicly available data from Reddit. Due to the nature of the data, we were not able to obtain individual participant consent. Instead, we applied for a formal Exemption from Ethical Review from The Deakin University Human Research Ethics Committee (DUHREC). This process involved declaring that we would not share our data in order to protect any identifying features in the full dataset (e.g., full quotes of posts that might be directly searched online to reveal the original poster). Researchers who wish to obtain access to our dataset are able to make a request to the following: Human Research Ethics Office, Deakin University 221 Burwood Hwy Burwood, VIC 3125 AUSTRALIA Phone: +61 3 9251 7123 Email: research-ethics@deakin.edu.au Project: HEAG-H 140_2019: Internet text analysis of parenting situations.",Method,Yes,No,N/A,N/A,N/A,N/A,Method,Yes,No,N/A,Yes,10.31234/osf.io/cw54u,11/06/2020,http://dx.doi.org/10.31234/osf.io/cw54u,PsyArXiv
29/01/2021,2021,10.1371/journal.pcbi.1008550,"Metabolic networks,Breast tumors,Inborn errors of metabolism,Cancers and neoplasms,Mathematics,Computer and information sciences,Biochemistry,Medical conditions,Metabolic disorders,Discrete mathematics,Medicine and health sciences,Metabolites,Breast cancer,Oncology,Metabolomics,Combinatorics,Physical sciences,Metabolism,Permutation,Biology and life sciences,Network analysis,Metabolic pathways",United States of America,"All data used in this publication was published in a Supplemental Table of a legacy publication (Miller et al., 2015). This data was downloaded and included as a data object in our CTD R package. You can load the data within the CTD R package with the command: data(Miler2015).The CTD R package is freely available via CRAN. CTDâ€™s codebase is inherently imperative, procedural, modular, and makes use of several base R data structures and function calls. All major results in this paper can be reproduced using a protocols.io Protocol (DOI: www.dx.doi.org/10.17504/protocols.io.bpdvmi66) we have developed to serve as an accompanying resource for this work.",Method,Yes,Yes,Supplementary Information|Online,"www.dx.doi.org/10.17504/protocols.io.bpdvmi66, 10.17504/protocols.io.bpdvmi66",N/A,Protocols.io,DA|Method|Supplementary,Yes,Yes,Online,No,NA,NA,NA,NA
31/03/2022,2022,10.1371/journal.pone.0263553,"Equipment,Nutrient and storage proteins,Chemical compounds,Peptides,Glutathione,Biology and life sciences,Plant science,Plant physiology,Proteins,Chemistry,Physiology,Antioxidants,Biochemistry,Reactive oxygen species,Plant reproduction,Wheat,Grasses,Engineering and technology,Seed germination,Laboratory equipment,Plant anatomy,Eukaryota,Organisms,Centrifuges,Physical sciences,Seeds,Plants",China,All minimal data files are available from the figshare database (https://figshare.com/s/58a81f6a8db2be1ad118) DOI: 10.6084/m9.figshare.19375256.,Method,Yes,Yes,Online,"https://figshare.com/s/58a81f6a8db2be1ad118, 10.6084/m9.figshare.19375256",N/A,figshare,N/A,No,No,N/A,Yes,10.1101/2022.01.24.477486,25/01/2022,http://dx.doi.org/10.1101/2022.01.24.477486,bioRxiv
24/01/2019,2019,10.1371/journal.pmed.1002734,"Population groupings,Biology and life sciences,Diarrhea,Gastroenterology and hepatology,Families,Treatment guidelines,Drugs,Pathology and laboratory medicine,Finance,Research design,Children,Health care,Research and analysis methods,Economics,Medicine and health sciences,Child health,Antibiotics,Pharmacology,Signs and symptoms,Survey research,Age groups,Geographical locations,Diagnostic medicine,Public and occupational health,Uganda,Surveys,Antimicrobials,Pediatrics,Microbiology,Africa,Microbial control,People and places,Health care policy,Social sciences",United States of America,All relevant data are within the manuscript and its Supporting Information files.,Method,Yes,Yes,Supplementary Information,N/A,N/A,N/A,N/A,No,Yes,Supplementary Information,No,NA,NA,NA,NA
12/03/2019,2019,10.1371/journal.pone.0212766,"Acceleration,Mathematical and statistical techniques,Resonance frequency,Damage mechanics,Physics,Optical materials,Materials,Classical mechanics,Accelerometers,Research and analysis methods,Resonance,Fourier analysis,Nonlinear dynamics,Physical sciences,Computer and information sciences,Engineering and technology,Deformation,Mathematics,Dynamic response,Electronics,Materials science,Systems science",China,All relevant data are within the paper and its Supporting Information files.,Fulltext,Yes,Yes,Supplementary Information,N/A,N/A,N/A,N/A,No,No,N/A,No,NA,NA,NA,NA
23/05/2019,2019,10.1371/journal.pone.0216995,"Biological databases,Phosphatases,Ions,Physical sciences,Evolutionary systematics,Computer and information sciences,Research and analysis methods,Physical chemistry,Gene expression,Enzymology,Adenosine triphosphatase,Genetics,Evolutionary biology,Amino acid sequence analysis,Cations,Data management,Enzymes,Phylogenetic analysis,Taxonomy,Biochemistry,Phylogenetics,Sequence analysis,Proteins,Database and informatics methods,Chemistry,Uranium,Bioinformatics,Cadmium,Chemical elements,Sequence databases,Biology and life sciences",India,"CzcA and czcD genes reported in this study are available freely in NCBI database at Accession Numbers MH423682 and MH394701, respectively.",Method,Yes,Yes,N/A,N/A,N/A,N/A,N/A,No,No,N/A,No,NA,NA,NA,NA
02/05/2019,2019,10.1371/journal.pone.0216282,"Social sciences,Internet,Psychology,Research and analysis methods,Computer software,Mental health and psychiatry,Medicine and health sciences,Cohort studies,Gender identity,Survey research,Computer and information sciences,Apps,Biology and life sciences,Surveys,Research design,Computer networks",United States of America,"The PRIDE Study iPhone app source code is available at github.com/delcurrie/pride-study. Underlying data cannot be made publicly available for the following reasons: members of the lesbian, gay, bisexual, transgender, and queer (LGBTQ) communities have experienced significant stigma and discrimination from society including the medical and investigational communities. As such, we are ethically bound to upholding the principle of non-maleficence; we promise our participants to not let any data (including deidentified) fall into the hands of people who may use it to publish stigmatizing results about the LGBTQ communities. As such, we have developed an Ancillary Study process in which investigators interested in using our data submit a brief application which is reviewed by both a Research Advisory Committee (composed of scientists) and Participant Advisory Committee (composed of participants) to affirm appropriate data use. Details about the Ancillary Study process are available at www.pridestudy.org/collaborate or by contacting us at support@pridestudy.org or 855-421-9991 (toll-free).",Method,Yes,Yes,Online,"www.pridestudy.org/collaborate, github.com/delcurrie/pride-study",N/A,"Github, pridestudy.org",DA|Method,Yes,Yes,Online,No,NA,NA,NA,NA
30/10/2020,2020,10.1371/journal.pone.0232568,Missing,China,All relevant data are within the paper and its Supporting Information files.,Method,Yes,Yes,Supplementary Information,N/A,N/A,N/A,N/A,No,No,N/A,Yes,10.1101/2020.04.20.050872,21/04/2020,http://dx.doi.org/10.1101/2020.04.20.050872,bioRxiv
21/03/2019,2019,10.1371/journal.pone.0213584,"Systems science,Chemical compounds,Health care,Public and occupational health,Behavioral and social aspects of health,Medicine and health sciences,Organism development,Physiology,Health education and awareness,Aging,Nonlinear systems,Alcohol consumption,Research design,Nutrition,Developmental biology,Physiological processes,Organic chemistry,Longitudinal studies,Biology and life sciences,Computer and information sciences,Database and informatics methods,Physical sciences,Diet,Research and analysis methods,Mathematics,Organic compounds,Chemistry,Alcohols",Canada,"Data underlying the study are from a third party. A public use file of data is available from the Wisconsin Longitudinal Study, University of Wisconsin-Madison, 1180 Observatory Drive, Madison, Wisconsin 53706 and at http://www.ssc.wisc.edu/wlsresearch/data/ and Health and Retirement Study available from https://hrs.isr.umich.edu/data-products/access-to-public-data. The authors confirm they did not have any special access to this data.",Method,Yes,Yes,Online,"http://www.ssc.wisc.edu/wlsresearch/data/, https://hrs.isr.umich.edu/data-products/access-to-public-data",N/A,N/A,Method,Yes,No,N/A,No,NA,NA,NA,NA
17/03/2020,2020,10.1371/journal.pone.0229365,"Salmonella,Fresh water,Bodies of water,Rivers,Organisms,Medical microbiology,Agriculture,Agricultural irrigation,Medicine and health sciences,Ecology and environmental sciences,Biology and life sciences,Enterobacteriaceae,Freshwater environments,Salmonella enterica,Bacterial pathogens,Aquatic environments,Agricultural methods,Earth sciences,Marine and aquatic sciences,Microbiology,Surface water,Listeria monocytogenes,Microbial pathogens,Bacteria,Infectious diseases,Bacterial diseases,Hydrology,Ponds,Pathology and laboratory medicine,Pathogens",United States of America,All relevant data are within the paper and its Supporting Information files.,Method,Yes,Yes,Supplementary Information,N/A,N/A,N/A,Method,Yes,No,N/A,No,NA,NA,NA,NA
01/11/2021,2021,10.1371/journal.pone.0258945,"Neuroscience,Organisms,Apps,Surveys,Research and analysis methods,Research design,Economics,Cognitive science,Virus testing,Computer software,Microbiology,Pathogens,Cognition,Public and occupational health,Medicine and health sciences,Internet,Biology and life sciences,SARS coronavirus,Decision making,Social sciences,Computer and information sciences,Medical microbiology,Coronaviruses,Microbial pathogens,Software engineering,RNA viruses,Pathology and laboratory medicine,Computer networks,SARS CoV 2,Viral pathogens,Survey research,Behavioral and social aspects of health,Viruses,Finance,Engineering and technology,Cognitive psychology,Diagnostic medicine,Psychology",United Arab Emirates,The data and replications files are included in the Supporting Information files.,Method,Yes,Yes,Supplementary Information,N/A,N/A,N/A,Method,Yes,No,N/A,Yes,10.31235/osf.io/9vp7x,01/06/2020,http://dx.doi.org/10.31235/osf.io/9vp7x,SocArXiv
15/07/2022,2022,10.1371/journal.pone.0268671,"Physical sciences,Analytical chemistry,Periodontal diseases,Mass spectrometry,Measurement,Inflammatory diseases,Physiology,Anatomy,Chemical compounds,Chromatographic techniques,Acids,Periodontitis,Carboxylic acids,Engineering and technology,Organic compounds,Butyric acids,Propionic acid,Oral diseases,Body fluids,Biology and life sciences,Medicine and health sciences,Organic chemistry,Oral medicine,Medical conditions,Spectrum analysis techniques,Gas chromatography-mass spectrometry,Chemistry,Saliva,Research and analysis methods",Japan,All relevant data are within the article and its Supporting information files.,Method,Yes,Yes,Supplementary Information,N/A,N/A,N/A,Method,Yes,No,N/A,No,NA,NA,NA,NA
27/08/2021,2021,10.1371/journal.pone.0256704,"Protein structure prediction,Polymerase chain reaction,Computational biology,Molecular biology,Genetics,Reverse transcriptase-polymerase chain reaction,Genomics,Genome analysis,Research and analysis methods,Proteins,Computer and information sciences,Protein structure,Macromolecular structure analysis,Enzyme structure,Engineering and technology,Enzymology,Gene prediction,Enzymes,Biochemistry,Biology and life sciences,Artificial gene amplification and extension,Software engineering,Molecular biology techniques,Transferases,Protein domains,Computer software",Iran,All relevant data are within the manuscript and its Supporting Information files.,Method,Yes,Yes,Supplementary Information,N/A,N/A,N/A,Method|Supplementary,Yes,Yes,Supplementary Information,No,NA,NA,NA,NA
29/06/2021,2021,10.1371/journal.pone.0253581,"Maternal health,Pregnancy complications,Metaanalysis,Statistics,Epidemiology,Cardiovascular medicine,Research and analysis methods,Birth,Physical sciences,Obstetrics and gynecology,Mathematical and statistical techniques,Developmental biology,Antenatal care,Preterm birth,Medicine and health sciences,Cardiovascular diseases,Statistical methods,Pregnancy,Birth weight,Women's health,Physiological parameters,Body weight,Physiology,Neonates,Medical conditions,Mathematics,Biology and life sciences,Medical risk factors,Cardiology",Australia,All relevant data are within the manuscript and its Supporting Information files.,Fulltext,Yes,No,N/A,N/A,N/A,N/A,N/A,No,No,N/A,No,NA,NA,NA,NA
20/05/2020,2020,10.1371/journal.pone.0227786,"Genetic oscillators,Apoptosis,Signal transduction,Mechanisms of signal transduction,Circadian oscillators,Physiology,Genetics,Circadian rhythms,Homeostatic mechanisms,Chronobiology,Medicine and health sciences,Biochemistry,Homeostasis,Feedback regulation,Cell biology,Physiological processes,DNA,Nucleic acids,Biology and life sciences,Cell death,Cell processes,DNA damage",Norway,All relevant data are within the manuscript and its Supporting Information files.,N/A,No,Yes,Supplementary Information,N/A,N/A,N/A,Method|Supplementary,Yes,Yes,Supplementary Information,Yes,10.1101/2019.12.31.891622,02/01/2020,http://dx.doi.org/10.1101/2019.12.31.891622,bioRxiv
31/05/2019,2019,10.1371/journal.pone.0217488,"Catheters,Research and analysis methods,Hepatic resection,Bilirubin,Veins,Gastroenterology and hepatology,Bioengineering,Chemistry,Bile,Animal models,Experimental organism systems,Ammonia,Surgical resection,Digestive system procedures,Liver function tests,Medical devices and equipment,Animal studies,Portal veins,Cardiovascular anatomy,Physiology,Pig models,Biology and life sciences,Biotechnology,Physical sciences,Chemical compounds,Engineering and technology,Hepatectomy,Surgical and invasive medical procedures,Body fluids,Anatomy,Blood vessels,Medicine and health sciences",Germany,All relevant data are within the manuscript and its Supporting Information files.,Method,Yes,No,N/A,N/A,N/A,N/A,N/A,No,No,N/A,No,NA,NA,NA,NA
09/06/2022,2022,10.1371/journal.pone.0269425,"Oncology,Cancer detection and diagnosis,Eukaryota,People and places,Questionnaires,Biology and life sciences,Organisms,Hematology,Amniotes,Vertebrates,Professions,Dogs,Research and analysis methods,Veterinary medicine,Veterinarians,Survey research,Animals,Veterinary science,Hematologic cancers and related disorders,Zoology,Research design,Population groupings,Diagnostic medicine,Cancers and neoplasms,Mammals,Veterinary diagnostics,Medicine and health sciences,Lymphoma",United States of America,An analytic dataset is provided in the Supporting information files. Individually identifying information has been removed from the dataset to protect participant privacy.,Fulltext,Yes,Yes,Supplementary Information|Online,"https://www.morrisanimalfoundation.org/golden-retriever-lifetime-study-rfp, https://datacommons.morrisanimalfoundation.org/publications, https://www.snomed.org/, https://datacommons.morrisanimalfoundation.org/, https://www.morrisanimalfoundation.org/sites/default/files/filesync/GRLS-Annual-Kit-Instructions.pdf, https://www.morrisanimalfoundation.org/sites/default/files/filesync/GRLS-Annual-Veterinarian-Questionnaire.pdf",N/A,N/A,N/A,No,No,N/A,No,NA,NA,NA,NA
04/04/2019,2019,10.1371/journal.pone.0214890,"Cell biology,Specimen disruption,Taste,Signal transduction,Graphs,Computer and information sciences,Mechanical treatment of specimens,Sensory receptors,Chemotherapy,Social sciences,Cell processes,Infographics,Cell disruption,Medicine and health sciences,Fractionation,Data visualization,Specimen preparation and treatment,Sensory perception,Research and analysis methods,Separation processes,Pharmaceutics,Taste buds,Drug therapy,Neuroscience,Biology and life sciences,Cell proliferation,Psychology",United States of America,All relevant data are within the manuscript and its Supporting Information files.,Method,Yes,No,N/A,N/A,N/A,N/A,Method,Yes,No,N/A,No,NA,NA,NA,NA
06/02/2019,2019,10.1371/journal.pone.0211230,"Infectious diseases,Medicine and health sciences,Endocrinology,Type 2 diabetes,Pulmonology,Diabetes mellitus,Digestive system procedures,Pneumonia,Surgical and invasive medical procedures,Health care,Endocrine disorders,Cardiovascular procedures,Hospitals,Nosocomial infections,Metabolic disorders,Health care facilities",Spain,"This study used third party data (data not owned nor collected by the author). These data belongs to the Spanish Ministry of Health and Social Services (SMHSS). The data was provided to the authors by the SMHSS using the link http://www.msssi.gob.es/estadEstudios/estadisticas/estadisticas/estMinisterio/SolicitudCMBDdocs/FormularioPeticion_Datos_CMBD.pdf. Any other investigators would be able to access these data in the same manner as the authors, who did not have any special access privileges that others would not have. Any investigator can apply to the SMHSS for the databases filling the questionnaire available at: http://www.msssi.gob.es/estadEstudios/estadisticas/estadisticas/estMinisterio/SolicitudCMBDdocs/FormularioPeticion_Datos_CMBD.pdf.",Method,Yes,Yes,Online,http://www.msssi.gob.es/estadEstudios/estadisticas/estadisticas/estMinisterio/SolicitudCMBDdocs/FormularioPeticion_Datos_CMBD.pdf,N/A,N/A,N/A,No,No,N/A,No,NA,NA,NA,NA
30/04/2021,2021,10.1371/journal.pone.0250173,"Neuroscience,Cognitive science,Happiness,Emotions,Test statistics,Cognitive psychology,Language,Social sciences,Mathematical and statistical techniques,Signal processing,Psychology,Equipment,Audio equipment,Physical sciences,Linguistics,Fear,Audio signal processing,Engineering and technology,Statistical methods,Statistics,Biology and life sciences,Speech,Research and analysis methods,Mathematics",Bangladesh,Data are available in Zenodo (DOI: 10.5281/zenodo.4526477).,Fulltext,Yes,Yes,Supplementary Information|Online,10.5281/zenodo.4526477,N/A,Zenodo,N/A,No,No,N/A,No,NA,NA,NA,NA
23/04/2020,2020,10.1371/journal.pone.0232194,"Diagnostic medicine,Histology,Molecular development,Innate immune system,Statistical data,Immune physiology,Inflammation,Physical sciences,Statistics,Immunoassays,Immune response,Research and analysis methods,Pathology and laboratory medicine,Immune system,Enzyme-linked immunoassays,Physiology,Nephrology,Anatomy,Immunologic techniques,Cytokines,Steroid therapy,Drug therapy,Mathematics,Biology and life sciences,Nephritis,Developmental biology,Pharmaceutics,Medicine and health sciences,Lesions,Signs and symptoms,Immunology",Japan,All relevant data are within the manuscript and its Supporting Information files.,Method,Yes,Yes,Supplementary Information,N/A,N/A,N/A,N/A,No,No,N/A,No,NA,NA,NA,NA
12/04/2019,2019,10.1371/journal.pcbi.1006522,Missing,The Netherlands,Data is held in the public repository of the Radboud University (https://bitbucket.org/bkasap/sc_microstimulation).,Method,Yes,Yes,Online,https://bitbucket.org/bkasap/sc_microstimulation,N/A,N/A,Method,Yes,No,N/A,Yes,10.1101/424127,21/09/2018,http://dx.doi.org/10.1101/424127,bioRxiv
03/06/2021,2021,10.1371/journal.pbio.3001264,"Cattle,Bovines,Nutrition,Eukaryota,Amniotes,Mammals,Farms,Diet,Medicine and health sciences,Vertebrates,Nutrients,Organisms,Meat,Beef,Ruminants,Agrochemicals,Fertilizers,Zoology,Agriculture,Animal products,Animals,Food,Biology and life sciences",United States of America,"All relevant data are within the paper, its Supporting Information files, or in a publicly available data file whose DOI is 10.13140/RG.2.2.28878.18248.",Method,Yes,Yes,Online,10.13140/RG.2.2.28878.18248,N/A,N/A,N/A,No,No,N/A,No,NA,NA,NA,NA
28/12/2020,2020,10.1371/journal.pone.0243991,"Tropical diseases,Animals,Squamates,Medical risk factors,Neglected tropical diseases,Age groups,Snakebite,Amniotes,People and places,Organisms,Biology and life sciences,Asia,Snakes,Eukaryota,Medicine and health sciences,Sri Lanka,Zoology,Vipers,Population groupings,Geographical locations,Reptiles,Epidemiology,Agriculture,Medical conditions,Vertebrates",Sri Lanka,All relevant data supporting the findings are within the manuscript.,Method,Yes,No,N/A,N/A,N/A,N/A,N/A,No,No,N/A,No,NA,NA,NA,NA
30/01/2020,2020,10.1371/journal.pone.0227138,"Mucus,Urine,Physical sciences,Economics,Cost-effectiveness analysis,Research and analysis methods,Mathematics,Physiology,Algorithms,Medicine and health sciences,Bacterial diseases,Body fluids,Simulation and modeling,Sputum,Diagnostic medicine,Tropical diseases,Tuberculosis,Anatomy,Economic analysis,X-ray microscopy,Infectious diseases,Applied mathematics,Tuberculosis diagnosis and management,Social sciences,Biology and life sciences,Microscopy",France,All relevant data are within the manuscript and its Supporting Information files.,Method,Yes,Yes,Supplementary Information,N/A,N/A,N/A,Method|Supplementary,Yes,No,N/A,No,NA,NA,NA,NA
12/04/2019,2019,10.1371/journal.pone.0215368,"Autosomes,Clinical genetics,Genetics,Diagnostic medicine,Medicine and health sciences,Biology and life sciences,Down syndrome,Chromosomal disorders,DNA sequencing,Chromosome biology,Cell biology,Edwards syndrome,Prenatal diagnosis,Molecular biology techniques,Sequencing techniques,Chromosomes,Patau syndrome,Pregnancy,Maternal health,Research and analysis methods,Women's health,Departures from diploidy,Aneuploidy,Molecular biology,Obstetrics and gynecology",China,All relevant data are within the manuscript and its Supporting Information files.,Method,Yes,Yes,Supplementary Information,N/A,N/A,N/A,Method,Yes,No,N/A,No,NA,NA,NA,NA
10/04/2020,2020,10.1371/journal.pone.0225559,"Respiration,Muscles,Sports and exercise medicine,Public and occupational health,Organisms,Musculoskeletal system,Animals,Muscle analysis,Eukaryota,Mammals,Anatomy,Physiology,Bioassays and physiological analysis,Equines,Biological locomotion,Animal management,Amniotes,Vertebrates,Horses,Exercise,Biology and life sciences,Agriculture,Medicine and health sciences,Physiological processes,Physical activity,Research and analysis methods,Strength training,Breathing,Skeletal muscles,Physical fitness,Sports science,Walking,Animal husbandry",Ireland,All relevant data are within the manuscript.,Method,Yes,No,N/A,N/A,N/A,N/A,Method,Yes,No,N/A,Yes,10.1101/843417,15/11/2019,http://dx.doi.org/10.1101/843417,bioRxiv
28/01/2021,2021,10.1371/journal.pone.0245990,"Social sciences,Research and analysis methods,Data management,Model organisms,Eukaryota,Vision,Physics,Cognitive psychology,Animal models,Radii,Cognitive science,Perception,Experimental organism systems,Luminance,Probability theory,Probability density,Light,Animals,Computer and information sciences,Neuroscience,Drosophila,Arthropoda,Psychology,Animal studies,Visible light,Invertebrates,Electromagnetic radiation,Drosophila melanogaster,Physical sciences,Biology and life sciences,Geometry,Graphs,Entomology,Data visualization,Sensory perception,Infographics,Insects,Zoology,Mathematics,Organisms,Behavior",Taiwan,The complete dataset is archived at https://figshare.com/articles/dataset/Han_R_et_al_2020_rar/13233353.,Method,Yes,Yes,Online,https://figshare.com/articles/dataset/Han_R_et_al_2020_rar/13233353,N/A,figshare,Method,Yes,No,N/A,No,NA,NA,NA,NA
10/06/2019,2019,10.1371/journal.pone.0217677,"Professions,Psychology,Literacy,Teachers,Cognitive neuroscience,Disabilities,Neuroscience,Social sciences,Families,Medicine and health sciences,Asia,Schools,Learning disabilities,Children,Afghanistan,Public and occupational health,Learning,People and places,Education,Biology and life sciences,Cognitive psychology,Learning and memory,Geographical locations,Sociology,Academic skills,Age groups,Cognitive science,Population groupings",United States of America,"The data underlying this study come from two household surveys carried out in 13 provinces of Afghanistan in 2004 and 2013. These data includes all the variables necessary to perform the analysis and replicate all conclusions of this study, including means, SD, and the data required for the provincial and district maps. The data are available in the DRYAD repository via DOI: 10.5061/dryad.c2b5vd6.",Method,Yes,Yes,Online,10.5061/dryad.c2b5vd6,N/A,Dryad Digital Repository,Method,Yes,No,N/A,No,NA,NA,NA,NA
21/10/2019,2019,10.1371/journal.pone.0224208,"Engineering and technology,Atomic force microscopy,Nanotechnology,Research and analysis methods,Microscopy,Scanning probe microscopy,Chemical elements,Chemical deposition,Scanning electron microscopy,Materials science,Sublimation,Manufacturing processes,Heat treatment,Physical sciences,Surface treatments,Condensed matter physics,Nanoparticles,Physics,Chemistry,Electron microscopy,Physical chemistry,Thin films,Materials,Phase transitions",South Korea,All relevant data are within the paper and its Supporting Information files.,Method,Yes,No,N/A,N/A,N/A,N/A,Method,Yes,No,N/A,No,NA,NA,NA,NA
19/10/2021,2021,10.1371/journal.pcbi.1009542,"Breast tumors,Gene expression,Cancers and neoplasms,Mathematics,Etiology,Genetics,Mutation,Medicine and health sciences,Medical risk factors,Pathology and laboratory medicine,Genetic causes of cancer,Breast cancer,Point mutation,Similarity measures,Statistics,Oncology,Cancer risk factors,Physical sciences,Biology and life sciences,Substitution mutation,Cosine similarity,Epidemiology",Israel,Code and links to data can be found here: https://github.com/GalGilad/DDC.,Method,Yes,Yes,Supplementary Information|Online,https://github.com/GalGilad/DDC,N/A,Github,DA,Yes,Yes,Online,No,NA,NA,NA,NA
05/08/2021,2021,10.1371/journal.pone.0255233,"Geography,Human geography,Transportation,Industrial organization,Earth sciences,Engineering and technology,Quantum mechanics,Physical sciences,Civil engineering,Perturbation theory,Urban infrastructure,Physics,Cities,Economics,Urban geography,Neighborhoods,Finance,Social sciences,Housing,Social geography,Structure of markets",China,"All this study adopted the real property price datasets based on freely downloadable data from the local government institute websites: 1.Analyze Boston,2019. Available from: https://data.boston.gov/dataset/property-assessment. 2.Milwaukee open data,2019. Available from: https://data.milwaukee.gov/dataset/property-sales-data. 3. Ministry of the interior Real Estate Transaction Information System for Taipei,2019-2020. Available from: https://plvr.land.moi.gov.tw/DownloadOpenData. 4. Download real estate transaction price information for Tokyo Japan,2019. Available from: https://www.land.mlit.go.jp/webland/download.html?fbclid=IwAR2CgBSIpJSup4SHcctIn0xP1UCtRoIz9XBLRnDlL_gE34QWxebrU_9BWxs.",Fulltext,Yes,Yes,Supplementary Information|Online,"https://data.milwaukee.gov/dataset/property-sales-data, https://data.boston.gov/dataset/property-assessment, https://plvr.land.moi.gov.tw/DownloadOpenData, https://www.land.mlit.go.jp/webland/download.html?fbclid=IwAR2CgBSIpJSup4SHcctIn0xP1UCtRoIz9XBLRnDlL_gE34QWxebrU_9BWxs",N/A,N/A,N/A,No,No,N/A,No,NA,NA,NA,NA
12/09/2019,2019,10.1371/journal.pgen.1008367,"Gene regulation,Plant genetics,Network analysis,Phenotypes,Research and analysis methods,Biology and life sciences,Plant science,Genetic loci,Computer and information sciences,Molecular biology techniques,Gene expression,Gene mapping,Molecular biology,Gene identification and analysis,Genetic networks,Quantitative trait loci,Genetics",United States of America,The linkage map used for QTL and eQTL analyses is available in [58]. Replicate level FVT parameters are presented in S7 Table; RIL-specific gene expression values are available via FigShare at https://doi.org/10.6084/m9.figshare.7661093. All other data are included in supplemental files associated with the manuscript.,Method,Yes,Yes,Supplementary Information|Online,"https://doi.org/10.6084/m9.figshare.7661093, 10.6084/m9.figshare.7661093",N/A,figshare,Method,Yes,No,N/A,Yes,10.1101/540740,07/02/2019,http://dx.doi.org/10.1101/540740,bioRxiv
26/02/2021,2021,10.1371/journal.pone.0247703,"Attention,Verbal behavior,Verbal communication,People and places,Fear,Cognitive psychology,Biology and life sciences,Families,Medicine and health sciences,Neuroscience,Behavior,Population groupings,Anxiety,Cognitive science,Sociology,Mental health and psychiatry,Social sciences,Neuroses,Psychology,Age groups,Social systems,Neuropsychiatric disorders,Emotions,Anxiety disorders,Social anxiety disorder,Children,Adolescents",United Kingdom,The data will be held in a public repository.,Method,Yes,No,N/A,N/A,N/A,N/A,Method,Yes,No,N/A,Yes,10.21203/rs.2.396/v1,22/02/2019,http://dx.doi.org/10.21203/rs.2.396/v1,Research Square
11/08/2021,2021,10.1371/journal.pone.0255067,"Law enforcement,Linear algebra,Eigenvalues,Cognitive psychology,Intelligence,Professions,Roads,Transportation,Civil engineering,Neuroscience,Algebra,Crime,Mathematics,Computer and information sciences,Network analysis,Cognitive science,Sociology,Computer networks,Criminal justice system,Physical sciences,Engineering and technology,People and places,Psychology,Police,Biology and life sciences,Law and legal sciences,Social sciences,Population groupings,Transportation infrastructure,Criminology",Italy,We have uploaded online on GitHub the source code of our algorithm. Link: https://github.com/lcucav/criminal-nets/tree/master/missing_data.,Method,Yes,Yes,Online,https://github.com/lcucav/criminal-nets/tree/master/missing_data,N/A,Github,DA|Method,Yes,Yes,Online,No,NA,NA,NA,NA
30/12/2019,2019,10.1371/journal.pone.0226780,"Diet,Endoscopy,Organisms,Nutrition,Animals,Digestive system,Mammals,Gastroenterology and hepatology,Inflammatory bowel disease,Genetics,Bacteria,Microbiology,Amniotes,Medicine and health sciences,Biology and life sciences,Eukaryota,Medical microbiology,Genomics,Microbial genomics,Microbiome,Surgical and invasive medical procedures,Anatomy,Gastrointestinal tract,Dogs,Vertebrates,Biopsy",United States of America,Raw count data for bacterial counts via FISH and enumerative data for tight junction proteins are found as supplemental files. The data underlying the results presented in the study are available from DOI: 10.25380/iastate.10250774,Method,Yes,Yes,Supplementary Information|Online,10.25380/iastate.10250774,N/A,N/A,N/A,No,No,N/A,No,NA,NA,NA,NA
10/02/2021,2021,10.1371/journal.pone.0246577,"Sensory perception,Face,Neuroscience,Perception,Europe,Cognitive science,Attention,Sociology,Anatomy,Social cognition,Culture,People and places,Sensory cues,Psychology,Social systems,Head,Biology and life sciences,Medicine and health sciences,Cognitive neuroscience,Geographical locations,Social psychology,Social sciences,Cognitive psychology,Reaction time",Canada,"All data, analysis syntax, and supplementary materials are available on the Open Science Framework (https://osf.io/5pqdy).",Fulltext,Yes,Yes,Online,"https://osf.io/5pqdy, https://osf.io/5pqdy/, https://osf.io/yzvmt/",N/A,Open Science Framework,N/A,No,No,N/A,No,NA,NA,NA,NA
30/10/2020,2020,10.1371/journal.pgen.1009085,"Electrophoretic techniques,Research and analysis methods,Gene expression,Eukaryota,Microbiology,Gel electrophoresis,Salmonella,DNA purification,Biochemistry,Bacteria,Medical conditions,Genetics,Plants,Medicine and health sciences,Nucleic acids,Bacterial pathogens,Pathology and laboratory medicine,Physiology,Salmonella typhimurium,DNA,Medical microbiology,Reproductive physiology,Grasses,Pathogens,Microbial pathogens,Oat,Infectious diseases,Organisms,Purification techniques,Biology and life sciences,Enterobacteriaceae,Bacterial diseases",United States of America,All relevant data are within the manuscript and its Supporting Information files.,Method,Yes,Yes,N/A,N/A,N/A,N/A,Method,Yes,No,N/A,No,NA,NA,NA,NA
12/05/2021,2021,10.1371/journal.pone.0249590,"Gene identification and analysis,Point mutation,Mutation detection,Population biology,Diagnostic medicine,Medicine and health sciences,Cancers and neoplasms,Cancer detection and diagnosis,Metastasis,Mutation,Colorectal cancer,Cancer treatment,Genetics,Basic cancer research,Population metrics,Death rates,Oncology,Biology and life sciences",Saudi Arabia,"â€¢ As per KAIMRC ethics committee policy, the data of this study are not approved to be released publicly, and the data supporting the findings of this study will be available upon reasonable request. Data requests can be sent to the corresponding author or King Abdullah International Medical Research Center, mailing address P.O. Box 3660, Riyadh 11481, Mail Code 1515 (KAIMRC), Tel:(+966) 4294444, Email: KAIMRC@NGHA.MED.SA.",Method,Yes,No,N/A,N/A,N/A,N/A,DA,Yes,No,N/A,No,NA,NA,NA,NA
28/05/2019,2019,10.1371/journal.pone.0216161,"Pathogens,Probability theory,Biomolecular isolation,Oomycetes,Mathematics,Molecular biology techniques,Biology and life sciences,Molecular biology,Population biology,Physical sciences,Research and analysis methods,Microbiology,Pathology and laboratory medicine,Population metrics,Mycology,Mycelium,Organisms,Eukaryota,Birth rates,Fungal structure,Phytophthora,DNA isolation,Probability distribution,Fungi,Medicine and health sciences,Plant science,Plant pathology,Death rates",New Zealand,All relevant data are within the manuscript and its Supporting Information files.,Method,Yes,No,N/A,N/A,N/A,N/A,Method,Yes,No,N/A,No,NA,NA,NA,NA
06/01/2021,2021,10.1371/journal.pone.0241190,"Engineering and technology,Viral pathogens,Bioengineering,Political science,Microbial pathogens,Microbiology,RNA viruses,Veterinary science,Species colonization,Pathogens,Ecology and environmental sciences,Social sciences,Pandemics,National security,Medical risk factors,Pathology and laboratory medicine,Invasive species,Medicine and health sciences,Organisms,Epidemiology,Orthomyxoviruses,Viruses,Influenza viruses,Biology and life sciences,Veterinary diseases,Science policy,Medical microbiology",United Kingdom,"The initial questions provided by expert participants (the minimal data set) is provided in Appendix II. Further details on the contributors, including who they consulted to generate the questions, is provided in Appendix I.",N/A,No,No,N/A,N/A,N/A,N/A,N/A,No,No,N/A,No,NA,NA,NA,NA
11/09/2019,2019,10.1371/journal.pone.0221991,"Genetics,Cytokines,Cell biology,Biology and life sciences,Endocrinology,Animal cells,Immunology,White blood cells,Glucose,Developmental biology,Kidneys,Blood cells,Immune system,Organic compounds,Monosaccharides,Physiology,RNA,Immune physiology,Physical sciences,Medicine and health sciences,Endocrine disorders,Small interfering RNAs,Anatomy,Phenotypes,Diabetes mellitus,Innate immune system,Chemical compounds,Biochemistry,Carbohydrates,Gene expression,Organic chemistry,Metabolic disorders,Molecular development,Gene regulation,Renal system,Cellular types,Non-coding RNA,Macrophages,Nucleic acids,Chemistry,Immune cells",China,All relevant data are within the paper and its Supporting Information files.,Method,Yes,No,N/A,N/A,N/A,N/A,N/A,No,No,N/A,No,NA,NA,NA,NA
16/07/2020,2020,10.1371/journal.pone.0236049,"Imaging techniques,Cardiovascular anatomy,Endocrinology,Neurology,Anatomy,Cerebrovascular diseases,Pathology and laboratory medicine,Magnetic resonance imaging,Neuroscience,Brain morphometry,Hyperlipidemia,Blood vessels,Radiology and imaging,Signs and symptoms,Brain mapping,Diabetes mellitus,Diffusion weighted imaging,Arteries,Diagnostic radiology,Stroke,Endocrine disorders,Vascular medicine,Neuroimaging,Medicine and health sciences,Ischemic stroke,Diagnostic medicine,Biology and life sciences,Hypertension,Research and analysis methods,Blood pressure,Metabolic disorders",South Korea,All datasets related to this study are in the supporting information items in the form of excel file.,Method,Yes,Yes,Supplementary Information,N/A,N/A,N/A,N/A,No,No,N/A,No,NA,NA,NA,NA
24/06/2021,2021,10.1371/journal.pone.0253810,"Chromatin modification,Biochemistry,Metabolism,Amino acids,Chromatin,Chemistry,Proteins,Chemical compounds,Sulfur containing amino acids,Amino acid metabolism,Vaccination and immunization,Muscle tissue,Epigenetics,Chromosome biology,Anatomy,Gene ontologies,Genomics,Genome analysis,Organic chemistry,DNA,DNA modification,Organic compounds,Biological tissue,Computational biology,Methionine,Public and occupational health,Immunology,Gene expression,Muscle proteins,Genetics,DNA methylation,Nucleic acids,Physical sciences,Biology and life sciences,Medicine and health sciences,Preventive medicine,Cell biology",United States of America,Sequencing data can be accessed through GEO with accession number GSE168091.,Method,Yes,Yes,Supplementary Information|Online,N/A,GSE168091,Gene Expression Omnibus,Method,Yes,No,N/A,No,NA,NA,NA,NA
28/08/2020,2020,10.1371/journal.pone.0238417,"Viruses,Anatomy,Organisms,Medical microbiology,Virology,People and places,Body fluids,Viral replication,Viral nucleic acid,Viral diseases,Medicine and health sciences,Population biology,SARS CoV 2,Asia,Nucleic acids,Pathology and laboratory medicine,Infectious diseases,Medical conditions,Pathogens,Population genetics,Virus testing,Gene pool,Genetics,Biochemistry,Diagnostic medicine,Evolutionary biology,Physiology,Microbiology,Coronaviruses,Geographical locations,Viral pathogens,Malaysia,Blood,Microbial pathogens,COVID 19,RNA viruses,SARS coronavirus,Biology and life sciences",Malaysia,All relevant data are within the manuscript and its Supporting Information files,Method,Yes,Yes,Supplementary Information,N/A,N/A,N/A,N/A,No,No,N/A,No,NA,NA,NA,NA
12/03/2020,2020,10.1371/journal.pone.0230122,"North America,Wind,Neuroscience,Cognitive science,Probability distribution,Atmospheric science,Wind power,Earth sciences,Energy and power,Probability theory,Biology and life sciences,Electricity,Reasoning,Engineering and technology,Physics,Alternative energy,Cognitive psychology,Psychology,Mexico,Mathematics,Cognition,Meteorology,Geographical locations,Social sciences,Physical sciences,People and places,Decision making",Mexico,All data is contained within the manuscript.,Fulltext,Yes,Yes,Online,"https://app.cfe.mx/Aplicaciones/CCFE/Tarifas/TarifasCRECasa/Casa.aspx, http://viewer.nationalmap.gov/viewer/, http://sag01.iie.org.mx/sig/",N/A,N/A,N/A,No,No,N/A,No,NA,NA,NA,NA
27/07/2021,2021,10.1371/journal.pone.0255030,"Biology and life sciences,Software engineering,Social sciences,Computer hardware,Sensory perception,Simulation and modeling,Data processing,Numerical analysis,Vision,Algorithms,Preprocessing,Computer and information sciences,Cognitive science,Applied mathematics,Cognitive psychology,Physical sciences,Data management,Interpolation,Perception,Neuroscience,Computer architecture,Data visualization,Mathematics,Engineering and technology,Psychology,Research and analysis methods,Metadata",Russia,"The source code of the ReVisE system is available in a public repository hosted on GitHub under the URL https://github.com/deadmorous/revise All datasets considered in the paper are available for download at https://ftp.mpksoft.ru/revise_datasets/ Step-by step instruction on how to use those datasets and repeat ReVisE performance measurements are available in two public protocols, which are as follows: Build ReVisE on Ubuntu https://www.protocols.io/view/build-revise-on-ubuntu-bruwm6xe dx.doi.org/10.17504/protocols.io.bruwm6xe Prepare and run test on available dataset https://www.protocols.io/view/prepare-and-run-test-on-available-dataset-bruzm6x6 dx.doi.org/10.17504/protocols.io.bruzm6x6.",N/A,No,Yes,Online,"https://www.protocols.io/view/build-revise-on-ubuntu-bruwm6xe, dx.doi.org/10.17504/protocols.io.bruwm6xe, dx.doi.org/10.17504/protocols.io.bruzm6x6, https://github.com/deadmorous/revise, 10.17504/protocols.io.bruwm6xe, 10.17504/protocols.io.bruzm6x6, https://ftp.mpksoft.ru/revise_datasets/, https://www.protocols.io/view/prepare-and-run-test-on-available-dataset-bruzm6x6",N/A,"Protocols.io, Github",DA|Method,Yes,Yes,Online,No,NA,NA,NA,NA
18/03/2021,2021,10.1371/journal.pone.0248768,"Medicine and health sciences,Clinical oncology,Anatomy,Statistical methods,Breast tumors,Surgical oncology,Oncology,Malignant tumors,Mathematics,Mathematical and statistical techniques,Biology and life sciences,Epidemiology,Metaanalysis,Statistics,Cancers and neoplasms,Medical risk factors,Surgical and invasive medical procedures,Cancer risk factors,Systematic reviews,Research and analysis methods,Physical sciences,Cancer treatment,Research assessment,Breast cancer,Histology,Clinical medicine",Brazil,All relevant data are within the manuscript and its Supporting Information files.,Method,Yes,Yes,Supplementary Information,N/A,N/A,N/A,Method,Yes,No,N/A,No,NA,NA,NA,NA
28/04/2021,2021,10.1371/journal.pone.0250815,"Metabolic disorders,Medical conditions,Endocrinology,Hypertension,Organisms,Medical microbiology,Medicine and health sciences,Pathogens,Proteins,Vascular medicine,Diabetes mellitus,SARS CoV 2,Viruses,Virus testing,Diagnostic medicine,Pathology and laboratory medicine,Cellular types,Immunology,Viral diseases,Cell biology,Animal cells,C-reactive proteins,Microbial pathogens,Blood pressure,Biochemistry,Endocrine disorders,Blood cells,Microbiology,COVID 19,Viral pathogens,Coronaviruses,White blood cells,SARS coronavirus,RNA viruses,Immune cells,Infectious diseases,Biology and life sciences",China,Data cannot be shared publicly because of the contents including information that could compromise research participant privacy/consent. Data are available from the Renmin Hospital of Wuhan University Ethics Committee (contact via whdxrmyy@126.com) for researchers who meet the criteria for access to confidential data.,Method,Yes,No,N/A,N/A,N/A,N/A,N/A,No,No,N/A,No,NA,NA,NA,NA
11/12/2019,2019,10.1371/journal.pone.0226068,"Research and analysis methods,Yeast,Cell processes,Cytoskeletal proteins,Microbial pathogens,Model organisms,Eukaryota,Biochemistry,Antifungals,Antimicrobials,Pathology and laboratory medicine,Cell cycle and cell division,Drugs,Medical microbiology,Fungi,Microbiology,Secretory pathway,Experimental organism systems,Candida albicans,Pharmacology,Mycology,Animal studies,Pathogens,Fungal pathogens,Yeast and fungal models,Endocytosis,Cytoskeleton,Cell biology,Biology and life sciences,Saccharomyces,Saccharomyces cerevisiae,Candida,Microbial control,Contractile proteins,Antimicrobial resistance,Actins,Cellular structures and organelles,Proteins,Organisms,Medicine and health sciences",United States of America,The sequence data are publicly available in the NCBI SRA under BioProject accession number PRJNA491750. Perl scripts are available from GitHub at https://github.com/fma3b/Barcode_Seq_Analysis. All other relevant data are within the paper and its Supporting Information files.,Method,Yes,Yes,Supplementary Information|Online,https://github.com/fma3b/Barcode_Seq_Analysis,PRJNA491750,Github,DA|Method,Yes,Yes,Online,No,NA,NA,NA,NA
23/07/2019,2019,10.1371/journal.pone.0218926,"Neuroscience,Sensory physiology,Brain mapping,Cognitive psychology,Behavior,Electrophysiological techniques,Bioassays and physiological analysis,Learning and memory,Physiology,Social sciences,Memory,Medicine and health sciences,Electrophysiology,Clinical neurophysiology,Attention,Emotions,Cognitive science,Biology and life sciences,Research and analysis methods,Neuroimaging,Vision,Cognition,Motivation,Neurophysiology,Electroencephalography,Sensory perception,Brain electrophysiology,Clinical medicine,Psychology,Imaging techniques",Finland,"Due to the nature of our ethical approval by the Aalto University Research Ethics Committee, and due to the nature of our ""Research Data Form"" documents (""Tieteellisen Tutkimuksen Rekisteriseloste"" in Finnish), raw data cannot be publicly shared. Interested researchers may request raw data access by contacting the Aalto University Vice President of Research (vp-research@aalto.fi), citing reference numbers 2014_18 and 2016_02.",Fulltext,Yes,Yes,Supplementary Information,N/A,N/A,N/A,N/A,No,No,N/A,No,NA,NA,NA,NA
26/04/2021,2021,10.1371/journal.pone.0250077,"Research and analysis methods,Medical devices and equipment,Body limbs,Legs,Musculoskeletal system,Deformation,Patella,Anatomy,Biotechnology,Connective tissue,Alloys,Steel,Materials science,Knees,Damage mechanics,Simulation and modeling,Medicine and health sciences,Classical mechanics,Physics,Cartilage,Bioengineering,Medical implants,Metallurgy,Stainless steel,Biological tissue,Biology and life sciences,Knee joints,Skeletal joints,Skeleton,Physical sciences,Engineering and technology",United Kingdom,The data has been uploaded to the University of Leeds repository: [https://doi.org/10.5518/957].,Method,Yes,Yes,Online,"10.5518/957, https://doi.org/10.5518/957",N/A,N/A,N/A,No,No,N/A,No,NA,NA,NA,NA
31/12/2020,2020,10.1371/journal.pone.0244745,"Numerical analysis,Physical sciences,Statistics,Image processing,Research and analysis methods,Mathematics,Imaging techniques,X-ray radiography,Algorithms,Interpolation,Radiology and imaging,Medicine and health sciences,Simulation and modeling,Soft tissues,Diagnostic medicine,Diagnostic radiology,Noise reduction,Anatomy,Signal processing,Biological tissue,Applied mathematics,Bone imaging,Statistical noise,Biology and life sciences,Engineering and technology",Japan,All relevant data are within the manuscript and its Supporting Information files.,Method,Yes,Yes,Supplementary Information,N/A,N/A,N/A,Method,Yes,No,N/A,No,NA,NA,NA,NA
29/11/2021,2021,10.1371/journal.pcbi.1009625,"Nucleic acids,Gene expression,Small interfering RNA,Molecular dynamics,Physics,MicroRNAs,Condensed matter physics,Biochemical simulations,Solid state physics,RNA,Gene regulation,Non-coding RNA,Macromolecular structure analysis,Computational biology,Biochemistry,Physical sciences,Computational chemistry,Genetics,Proteins,Crystallography,Messenger RNA,Chemistry,Biology and life sciences,Molecular biology,Protein structure,Crystal structure,Natural antisense transcripts",Germany,All relevant data are within the manuscript and its Supporting Information files.,Method,Yes,No,N/A,N/A,N/A,N/A,Method,Yes,No,N/A,No,NA,NA,NA,NA
04/09/2020,2020,10.1371/journal.pone.0230651,"Amniotes,Otology,Ophthalmology,Sensory perception,Neuroscience,Social sciences,Vertebrates,Hearing disorders,Veterinary diagnostics,Cognitive psychology,Animal behavior,Dogs,Medicine and health sciences,Veterinary medicine,Perception,Eukaryota,Mammals,Vision,Pets and companion animals,Zoology,Organisms,Psychology,Deafness,Behavior,Otorhinolaryngology,Visual impairments,Biology and life sciences,Cognitive science,Veterinary science,Animals",France,All relevant data are within the manuscript and its Supporting Information files.,Method,Yes,No,N/A,N/A,N/A,N/A,N/A,No,No,N/A,Yes,10.1101/2020.03.06.980482,07/03/2020,http://dx.doi.org/10.1101/2020.03.06.980482,bioRxiv
28/10/2019,2019,10.1371/journal.pone.0224113,"Promoter regions,Synthetic genomics,Long non-coding RNAs,Synthetic genome editing,Research and analysis methods,Gene expression,Nucleic acids,Genome engineering,Regulator genes,Genetics,Synthetic biology,Biochemistry,RNA,Transcriptional control,Gene types,Non-coding RNA,Genetic loci,Molecular biology,Engineering and technology,Bioengineering,Molecular biology techniques,Transfection,CRISPR,DNA transcription,Synthetic bioengineering,Biology and life sciences,Gene regulation,DNA",Canada,"Transcriptome profiling on SG-286/CRISPRa transfected cells was performed at the Centre for Applied Genomics (The Hospital for Sick Children, ON, Canada). Purified RNA, was converted to cRNAs and hybridized to Human Clariom D arrays. Results were analyzed by using the Expression and Transcriptome Analysis Consoles (Applied Biosystems); Array data have been deposited at the GEO repository as GSE132451.",Method,Yes,Yes,Supplementary Information|Online,https://www.ncbi.nlm.nih.gov/geo/query/acc.cgi?acc=GSE132451,GSE132451,Gene Expression Omnibus,Method,Yes,No,N/A,No,NA,NA,NA,NA
08/04/2021,2021,10.1371/journal.pone.0249732,"Infectious disease control,Medicine and health sciences,Social sciences,Medical risk factors,Infectious diseases,Health care,Social distancing,People and places,Virus testing,Pandemics,Norway,Europe,European Union,Sweden,Viral diseases,Medical conditions,Diagnostic medicine,Health economics,COVID 19,Geographical locations,Economics,Epidemiology",Germany,Full replication files are available at https://www.benjaminborn.de/files/Code_BDM_Feb_2021.zip.,Method,Yes,Yes,Online,https://www.benjaminborn.de/files/Code_BDM_Feb_2021.zip,N/A,N/A,N/A,No,No,N/A,No,NA,NA,NA,NA
28/10/2020,2020,10.1371/journal.pone.0240365,"Paleogenetics,Developmental biology,Paleontology,Biology and life sciences,Anatomy,Geologic time,New species reports,Larvae,Fossils,Zoology,Animal anatomy,Data management,Geology,Medicine and health sciences,Earth sciences,Animal wings,South America,Taxonomy,Geographical locations,Phylogenetics,Brazil,Life cycles,Computer and information sciences,People and places,Phylogenetic analysis,Evolutionary systematics,Mesozoic era,Cretaceous period,Evolutionary biology",Brazil,All relevant data are within the paper and its Supporting Information files.,Method,Yes,No,N/A,N/A,N/A,N/A,Method,Yes,No,N/A,No,NA,NA,NA,NA
09/09/2019,2019,10.1371/journal.pone.0221587,"People and places,Europe,Eigenvectors,France,Germany,Network analysis,Denmark,Centrality,Physical sciences,Mathematics,Algebra,European Union,Geographical locations,Linear algebra,Computer and information sciences",Italy,"The data underlying the results presented in the study are available from the European Transaction Log, URL: http://ec.europa.eu/environment/ets/transaction.do;EUROPA_JSESSIONID=2ftK1xBz5n1BQ3AYKj_nZtcOdTm8NlFWJPCFpAN92yYt61TtXe1t!1363888161.",Method,Yes,Yes,Online,http://ec.europa.eu/environment/ets/transaction.do;EUROPA_JSESSIONID=2ftK1xBz5n1BQ3AYKj_nZtcOdTm8NlFWJPCFpAN92yYt61TtXe1t!1363888161,N/A,N/A,Method,Yes,No,N/A,No,NA,NA,NA,NA
16/03/2020,2020,10.1371/journal.pone.0229560,"Engineering and technology,Research and analysis methods,Signal processing,Skewness,Medicine and health sciences,Probability theory,Simulation and modeling,Diagnostic medicine,Tomography,Radiology and imaging,Physics,Statistical distributions,Positron emission tomography,Imaging techniques,Applied mathematics,Entropy,Computer and information sciences,Neuroscience,Physical sciences,Quantization,Biology and life sciences,Data acquisition,Mathematics,Thermodynamics,Probability distribution,Diagnostic radiology,Algorithms,Neuroimaging",Switzerland,All original PET/CT measurments are available from the osf database under the link https://osf.io/36c7s/?view_only=b7c9529129c649c3a32d5527df793265,Method,Yes,Yes,Online,https://osf.io/36c7s/?view_only=b7c9529129c649c3a32d5527df793265,N/A,Open Science Framework,Method,Yes,No,N/A,No,NA,NA,NA,NA
08/07/2019,2019,10.1371/journal.pone.0218930,"Applied mathematics,Research and analysis methods,Nutrition,Diet,Remote sensing,Mathematics,Computer and information sciences,Algorithms,Engineering and technology,Alcoholic beverages,Medicine and health sciences,Immune system,Beverages,Simulation and modeling,Immunology,Data mining,Animal cells,Blood cells,Immune cells,Physical sciences,Information technology,Artificial intelligence,Cellular types,T cells,Support vector machines,Machine learning,Wine,Cell biology,Biology and life sciences,White blood cells,Sonar",Portugal,All relevant data are within the manuscript and its Supporting Information files.,Method,Yes,No,N/A,N/A,N/A,N/A,Method|Supplementary,Yes,No,N/A,No,NA,NA,NA,NA
07/03/2019,2019,10.1371/journal.pone.0213356,"Wheat,Trees,Plants,Imaging techniques,Crop science,Simulation and modeling,Research and analysis methods,Near-infrared spectroscopy,Physical sciences,Crops,Mathematics,Organisms,Pines,Grasses,Biology and life sciences,Eukaryota,Applied mathematics,Algorithms,Agriculture,Infrared spectroscopy,Cereal crops,Spectrum analysis techniques",United States of America,"The datasets used in this study are fine spatial resolution airborne remote sensing images (AVIRIS and HYDICE) that are owned by third-party organizations, and are publicly available online through their websites. AVIRIS and HYDICE datasets are publicly available online (https://engineering.purdue.edu/~biehl/MultiSpec/hyperspectral.html). All codes used are already available online through the R Project repository (https://cran.r-project.org/web/packages/randomForest/index.html). The authors confirm that we had no special access or privileges to the data and other interested researchers qualified may access the public data in the same manner as the authors.",Method,Yes,Yes,Online,"https://engineering.purdue.edu/~biehl/MultiSpec/hyperspectral.html, https://cran.r-project.org/web/packages/randomForest/index.html",N/A,"Comprehensive R Archive Network, engineering.purdue.edu",DA|Method,Yes,Yes,Online,Yes,10.1002/essoar.10500444.1,13/11/2019,http://dx.doi.org/10.1002/essoar.10500444.1,Earth and Space Science Open Archive
30/04/2020,2020,10.1371/journal.pone.0232494,"Diagnostic medicine,Ocular anatomy,Vascular medicine,Sensory perception,Vision,Social sciences,Blood vessels,Cardiovascular anatomy,Physical sciences,Radiology and imaging,Neuroscience,Ellipsoids,Eyes,Geometry,Research and analysis methods,Pathology and laboratory medicine,Hemorrhage,Computer and information sciences,Anatomy,Imaging techniques,Science policy,Retinal vessels,Diagnostic radiology,Open science,Psychology,Ocular system,Tomography,Visual acuity,Edema,Mathematics,Open source software,Biology and life sciences,Head,Medicine and health sciences,Signs and symptoms,Computer software",United States of America,The KNIME workflow is available at https://hub.knime.com/tetheridge/spaces/Public/latest/Raw_Thickness_Maps. The KNIME workflow protocol and training dataset are available at https://doi.org/10.6084/m9.figshare.11774577.,Method,Yes,Yes,Online,"https://hub.knime.com/tetheridge/spaces/Public/latest/Raw_Thickness_Maps, https://doi.org/10.6084/m9.figshare.11774577, 10.6084/m9.figshare.11774577",N/A,"figshare, hub.knime.com",Method,Yes,No,N/A,No,NA,NA,NA,NA
30/01/2020,2020,10.1371/journal.pcbi.1007591,"Brain,Physical sciences,Discrete mathematics,Biological locomotion,Mathematics,Vision,Cell biology,Biology and life sciences,Single neuron function,Medicine and health sciences,Combinatorics,Social sciences,Cellular types,Physiology,Neurons,Neuronal tuning,Sensory perception,Animal cells,Cellular neuroscience,Computational neuroscience,Permutation,Computational biology,Anatomy,Neuroscience,Psychology,Visual cortex,Running",United States of America,"The data underlying the results presented in this study were previously published in Dechery, J. B., & MacLean, J. N. (2018). â€œFunctional triplet motifs underlie accurate predictions of single-trial responses in populations of tuned and untuned V1 neurons.â€ PLOS Computational Biology, 14(5), 1â€“23. https://doi.org/10.1371/journal.pcbi.1006153. Additional files pertaining to model output are available from figshare at: https://figshare.com/articles/models_and_partial_correlations_zip/11413932.",Method,Yes,Yes,Online,"https://figshare.com/articles/models_and_partial_correlations_zip/11413932, 10.1371/journal.pcbi.1006153, https://doi.org/10.1371/journal.pcbi.1006153",N/A,figshare,Method,Yes,No,N/A,Yes,10.1101/635359,11/05/2019,http://dx.doi.org/10.1101/635359,bioRxiv
18/08/2021,2021,10.1371/journal.pone.0256345,"Evolutionary systematics,Eukaryota,Computer and information sciences,Artificial gene amplification and extension,Molecular biology techniques,Research and analysis methods,Genetics,Evolutionary biology,Plant cell biology,Plastids,Biotechnology,Data management,Phylogenetic analysis,Organisms,Taxonomy,Biochemistry,Plant science,Phylogenetics,Sequence analysis,Database and informatics methods,Plant genomics,Cellular structures and organelles,Genomics,Bioinformatics,Bioenergetics,Mitochondria,Fruits,Cell biology,Plant biotechnology,Polymerase chain reaction,Energy-producing organelles,Plant genetics,Sequence alignment,Plants,Bioengineering,Biology and life sciences,Molecular biology,Engineering and technology",Taiwan,All relevant data are within the manuscript and its Supporting Information files.,Method,Yes,Yes,Supplementary Information,N/A,N/A,N/A,Method,Yes,No,N/A,No,NA,NA,NA,NA
01/09/2021,2021,10.1371/journal.pone.0256754,"Plant and algal models,Eukaryota,Rice,Ecology and environmental sciences,Crop science,Polymerase chain reaction,Biology and life sciences,Bacteria,Community structure,Physical sciences,Agricultural soil science,Molecular biology,Soil science,Crops,Organisms,Chemistry,Soil chemistry,Agrochemicals,Environmental chemistry,Molecular biology techniques,Animal studies,Research and analysis methods,Agriculture,Plants,Fertilizers,Earth sciences,Community ecology,Ecology,Artificial gene amplification and extension,Experimental organism systems,Grasses",China,All relevant data are within the manuscript and its Supporting Information files.,Method,Yes,No,N/A,N/A,N/A,N/A,Method,Yes,No,N/A,Yes,10.21203/rs.3.rs-1995677/v1,29/08/2022,http://dx.doi.org/10.21203/rs.3.rs-1995677/v1,Research Square
23/05/2019,2019,10.1371/journal.pone.0216548,"Nose,Families,Biotechnology,Ethnicities,Equipment,Medicine and health sciences,Age groups,Biology and life sciences,Cameras,Pediatrics,Head,Medical devices and equipment,African people,Engineering and technology,Optical equipment,Anatomy,People and places,Population groupings,Kongo people,Anthropometry,Children,Face,Bioengineering",Democratic Republic of the Congo,"Original individual video data underlying the results presented in the study cannot be shared publicly because of confidentiality and ethics restrictions. These can be available upon qualified request to Dr Amirav at amirav@ualberta.ca or to the Ethics Research Board, The University of Alberta, Edmonton Alberta, Canada (Re Pro00072555) at reoffice@ualberta.ca or 780-492-0459. All the aggregated relevant data and results are within the manuscript.",Method,Yes,No,N/A,N/A,N/A,N/A,Method,Yes,No,N/A,No,NA,NA,NA,NA
29/12/2020,2020,10.1371/journal.pone.0244640,"Health care,Asia,Bangladesh,Pregnancy complications,Health care facilities,Social sciences,Geographical locations,People and places,Pregnancy,Health care providers,Women's health,Demography,Indigenous populations,Antenatal care,Obstetrics and gynecology,Public and occupational health,Anthropology,Medicine and health sciences,Maternal health,Socioeconomic aspects of health",Bangladesh,"Following ethical approval provided by the Human Research Ethics Committee of the University of Newcastle, Australia, non-identifiable data may be shared with other parties to encourage scientific scrutiny and to contribute to further research and public knowledge. A data file converted to PDF format is attached as a supplementary file. Data can also be shared upon request via emailing NOVA, the University of Newcastle open access repository on Nova@newcastle.edu.au.",Method,Yes,Yes,Supplementary Information,N/A,N/A,N/A,N/A,No,No,N/A,No,NA,NA,NA,NA
21/07/2022,2022,10.1371/journal.pgph.0000806,"Psychology,Social sciences,Cardiovascular disease risk,Biology and life sciences,Behavior,Physical activity,Physiological parameters,Sedentary behavior,Cardiovascular diseases,Cardiovascular medicine,Physical fitness,Body weight,Heart rate,Medicine and health sciences,Physiology,Hypertension,Blood pressure,Sports science,Public and occupational health,Vascular medicine,Sports and exercise medicine,Medical conditions,Exercise,Cardiology",Kenya,Data have been availed with this submission.,Method,Yes,Yes,Supplementary Information,N/A,N/A,N/A,N/A,No,No,N/A,No,NA,NA,NA,NA
07/09/2021,2021,10.1371/journal.pone.0256648,"Machine learning algorithms,Simulation and modeling,Frontotemporal dementia,Biology and life sciences,Neurodegenerative diseases,Medical conditions,Transcriptome analysis,Neurology,Machine learning,Research and analysis methods,Dementia,Mathematics,Genomics,Medicine and health sciences,Genetics,Algorithms,Physical sciences,Artificial intelligence,Computational biology,Genome analysis,Gene expression,Applied mathematics,Mental health and psychiatry,Alzheimer's disease,Computer and information sciences,Neuropathy",United States of America,"The data contain sensitive patient information and cannot be shared publicly. However, the data are available via application for other researchers who meet the criteria for access to confidential data through the AD Knowledge Portal Institutional Data Access / Ethics Committee (https://www.synapse.org/#!Synapse:syn3219045). Additional data access inquiries may be sent to plosdataacess@gmail.com.",Method,Yes,Yes,Supplementary Information|Online,https://www.synapse.org/#!Synapse:syn3219045,N/A,N/A,Method,Yes,No,N/A,No,NA,NA,NA,NA
08/12/2020,2020,10.1371/journal.pone.0243236,"Diagnostic medicine,Ocular anatomy,Neurodegenerative diseases,Sensory perception,Vision,Autoimmune diseases,Perception,Social sciences,Blood vessels,Cardiovascular anatomy,Cardiovascular medicine,Radiology and imaging,Neuroscience,Cognitive science,Mental health and psychiatry,Eyes,Cardiology,Research and analysis methods,Angiography,Cognitive psychology,Anatomy,Imaging techniques,Retinal vessels,Diagnostic radiology,Cardiovascular imaging,Neurology,Psychology,Ocular system,Multiple sclerosis,Tomography,Clinical immunology,Visual acuity,Biology and life sciences,Head,Retina,Clinical medicine,Medicine and health sciences,Medical conditions,Demyelinating disorders,Immunology",Spain,All relevant data are within the manuscript and its Supporting Information files.,Method,Yes,Yes,Supplementary Information,N/A,N/A,N/A,N/A,No,No,N/A,No,NA,NA,NA,NA
22/06/2020,2020,10.1371/journal.pone.0234917,"Research and analysis methods,Cognitive science,Eukaryota,Vertebrates,Mathematics,Amniotes,Professions,Dogs,Neuroscience,Behavior,Cognition,Animals,Reproductive system procedures,Social sciences,Medicine and health sciences,Psychology,Animal behavior,Castration,Mathematical and statistical techniques,Chi square tests,Aggression,Zoology,Veterinarians,Statistics,Animal types,Pets and companion animals,People and places,Statistical methods,Mammals,Statistical hypothesis testing,Physical sciences,Organisms,Biology and life sciences,Surgical and invasive medical procedures,Population groupings",The Netherlands,All relevant data are within the manuscript and its Supporting Information files.,Method,Yes,Yes,Supplementary Information,N/A,N/A,N/A,Method,Yes,No,N/A,No,NA,NA,NA,NA
24/10/2019,2019,10.1371/journal.pone.0224233,"Questionnaires,Surveys,Biology and life sciences,Intensive care units,Nurses,Medicine and health sciences,Health care,Biotechnology,Medical personnel,Clinical research design,Health care facilities,Pediatrics,Health care providers,Adverse events,People and places,Research and analysis methods,Population groupings,Survey research,Engineering and technology,Research design,Professions,Hospitals,Medical devices and equipment,Equipment,Pediatric critical care,Bioengineering",Saudi Arabia,All relevant data are within the paper and its Supporting Information files.,Method,Yes,Yes,Supplementary Information,N/A,N/A,N/A,N/A,No,No,N/A,Yes,10.21203/rs.3.rs-42103/v1,06/08/2020,http://dx.doi.org/10.21203/rs.3.rs-42103/v1,Research Square
02/11/2020,2020,10.1371/journal.ppat.1008943,"Biology and life sciences,Organic chemistry,Genetics,Public and occupational health,Preventive medicine,Salt bridges,Physiology,Hydroxyl amino acids,Amino acids,Immunology,Condensed matter physics,Chemistry,Physics,Mutation,Solid state physics,Organic compounds,Chemical compounds,Biochemistry,Proteins,Immune response,Crystallography,Point mutation,Antigens,Aromatic amino acids,Physical sciences,Vaccine development,Vaccination and immunization,Medicine and health sciences,Immune system proteins,Electrochemistry,Antibodies,Tyrosine,Crystal structure,Immune physiology",United States of America,Each X-ray structure is available from the Protein Data Bank under PDB codes 6W52 and 6W5D.,Method,Yes,Yes,Supplementary Information,N/A,N/A,N/A,DA|Method,Yes,No,N/A,No,NA,NA,NA,NA
25/11/2019,2019,10.1371/journal.pcbi.1007249,"Gastrointestinal tract,Computer and information sciences,Renal system,Cardiovascular anatomy,Digestive system,Medicine and health sciences,Immune physiology,Eukaryota,Machine learning,Herbs,Plants,Stomach,Physiology,Anatomy,Large intestine,Spleen,Biology and life sciences,Artificial intelligence,Kidneys,Organisms,Heart,Traditional medicine,Traditional Chinese medicine,Complementary and alternative medicine",Finland,All relevant data are within the manuscript and its Supporting Information files. The code is available at https://github.com/herb-medicne/meridian-prediction.,Method,Yes,Yes,Supplementary Information|Online,https://github.com/herb-medicne/meridian-prediction,N/A,Github,DA|Method,Yes,Yes,Online,Yes,10.1101/697037,09/07/2019,http://dx.doi.org/10.1101/697037,bioRxiv
25/06/2019,2019,10.1371/journal.pone.0218758,"Anodes,Light,Physics,Biology and life sciences,Solar radiation,Electronics,Biochemistry,Cathodes,Plant anatomy,Leaves,Engineering and technology,Alternative energy,Electromagnetic radiation,Plant science,Capacitors,Photosynthesis,Plant biochemistry,Sunlight,Energy and power,Electrodes,Physical sciences",Malaysia,All relevant data are within the paper. The laboratory protocol for the experiments is prepared in protocol.io as requested by PLoS ONE. The doi is: dx.doi.org/10.17504/protocols.io.2yngfve.,Method,Yes,Yes,Online,"10.17504/protocols.io.2yngfve, dx.doi.org/10.17504/protocols.io.2yngfve",N/A,Protocols.io,N/A,No,No,N/A,No,NA,NA,NA,NA
04/08/2021,2021,10.1371/journal.pone.0254380,"Gray whales,Imaging techniques,Geography,Atmospheric science,Mammals,Whales,Research and analysis methods,Marine and aquatic sciences,Marine mammals,Biology and life sciences,Engineering and technology,Zoology,Geoinformatics,Animals,Marine biology,Computer vision,Target detection,Remote sensing imagery,Amniotes,Organisms,Right whales,Earth sciences,Eukaryota,Vertebrates,Computer and information sciences,Meteorology,Remote sensing,Humpback whales,Clouds,Beluga whales",Canada,All relevant data are within the manuscript and its Supporting Information files. Information about the satellite images and commercial provider have been added in the S1 Table.,Method,Yes,Yes,Supplementary Information,N/A,N/A,N/A,Method,Yes,No,N/A,No,NA,NA,NA,NA
17/02/2022,2022,10.1371/journal.pone.0264062,"Public and occupational health,Virology,Medicine and health sciences,Liver diseases,HIV vaccines,Hispanic people,Sociology,Economics,People and places,Preventive medicine,Health care,Infectious hepatitis,Health insurance,Vaccination and immunization,Gastroenterology and hepatology,Ethnicities,Biology and life sciences,Hepatitis,Infectious diseases,Hepatitis B,Social sciences,Infectious disease control,Immunology,Population groupings,Medical conditions,Health economics,Education,Viral vaccines,Schools,Vaccines,Microbiology,Hepatitis A,Viral diseases",United States of America,"Data for these analyses were made available to the authors through third-party license from Optum, a commercial data provider. As such, the authors cannot make these data publicly available due to data use agreement. Other researchers can access these data by purchasing a license through Optum. Inclusion criteria specified in the Methods section would allow other researchers to identify the same cohort of patients used for these analyses. The authors did not have any special access privileges to the third-party licensed data. Interested individuals may see https://www.optum.com/business/solutions/life-sciences/explore-data.html for more information on accessing Optum data.",Method,Yes,Yes,Supplementary Information|Online,https://www.optum.com/business/solutions/life-sciences/explore-data.html,N/A,Optum,Method|Supplementary,Yes,Yes,Online,No,NA,NA,NA,NA
10/03/2021,2021,10.1371/journal.pone.0247486,"Polycystic ovary syndrome,Psychology,Menstrual cycle,Menarche,Endocrinology,Biology and life sciences,Mental health and psychiatry,Signs and symptoms,Gynecological tumors,Physiology,Social sciences,Endocrine physiology,Urology,Oncology,Pain,Maternal health,Women's health,Clinical medicine,Pregnancy,Obstetrics and gynecology,Reproductive physiology,Infertility,Cancers and neoplasms,Emotions,Quality of life,Medicine and health sciences,Health care",Saudi Arabia,"Data cannot be shared publicly because of confidentiality. Data are available from the Ethics Committee, AIIMS, Patna for researchers who meet the criteria for access to confidential data. Contact information for the ethics committee: (The Chairman, Institutional review board, All India Institute of Medical Sciences, Patna, Bihar (India), PIN-801507).",Method,Yes,No,N/A,N/A,N/A,N/A,N/A,No,No,N/A,No,NA,NA,NA,NA
09/04/2020,2020,10.1371/journal.pone.0231130,"Ophthalmology,Biology and life sciences,Traumatic injury risk factors,Brakes,Visual impairments,Safety,Sensory physiology,Mechanical engineering,Epidemiology,Sensory perception,Physiology,Road traffic collisions,Automotive engineering,Vision,Sensory systems,Traffic safety,Medicine and health sciences,Visual system,Psychology,Public and occupational health,Medical risk factors,Engineering and technology,Eye movements,Social sciences,Neuroscience",Japan,All relevant data are within the paper and its Supporting Information files.,Method,Yes,Yes,Supplementary Information,N/A,N/A,N/A,N/A,No,No,N/A,No,NA,NA,NA,NA
28/01/2019,2019,10.1371/journal.pone.0211389,"Gills,Zoology,Stable isotopes,Eukaryota,Physical sciences,Chemical compounds,Chemical characterization,Ecology and environmental sciences,Nitrates,Atoms,Histopathology,Composite particles,Chemistry,Fish,Calorimetry,Animal anatomy,Organisms,Animals,Anatomical pathology,Pollution,Vertebrates,Research and analysis methods,Isotopes,Particle physics,Biology and life sciences,Aquatic respiratory anatomy,Respiratory system,Physics,Medicine and health sciences,Anatomy,Biomarkers,Biochemistry,Water pollution,Pathology and laboratory medicine",Spain,"All excel data files are available in the supporting file ""S1 File.""",Method,Yes,Yes,Supplementary Information,N/A,N/A,N/A,N/A,No,No,N/A,No,NA,NA,NA,NA
17/06/2022,2022,10.1371/journal.pone.0270227,"Growth factors,Osteoblast differentiation,Fibroblast growth factor,Osteoblasts,Research and analysis methods,Molecular development,Cell differentiation,Animal cells,Developmental biology,Anatomy,Physiology,Cellular types,Endocrine physiology,Cell staining,Connective tissue,Biological tissue,Calcification,Adhesion molecules,Endocrinology,Staining,Gene expression,Genetics,Focal adhesions,Physiological processes,Specimen preparation and treatment,Fibroblasts,Biology and life sciences,Medicine and health sciences,Connective tissue cells,Cell biology",New Zealand,Data cannot be shared publicly because of adherence to Auckland Health Research Ethics Committee principles of data stewardship. Our data must be stored securely at the University of Auckland. Data are available from the University of Auckland on request by emailing humanethics@auckland.ac.nz (https://www.auckland.ac.nz/en/research/about-our-research/human-ethics/ahrec.html).,Method,Yes,Yes,Online,https://www.auckland.ac.nz/en/research/about-our-research/human-ethics/ahrec.html,N/A,N/A,N/A,No,No,N/A,No,NA,NA,NA,NA
15/03/2021,2021,10.1371/journal.pone.0248630,"Economics of training and education,Traumatic injury risk factors,Epidemiology,Public and occupational health,Health economics,Asia,Medicine and health sciences,Domestic violence,Geographical locations,Medical risk factors,Intimate partner violence,Schools,Sociology,Human capital,Criminology,Education,Labor economics,Social sciences,Health care,Violent crime,Crime,Turkey (country),Europe,Economics,People and places",Turkey,The data underlying this study is subject to third-party restrictions by the Turkey Statistical Institute. Data area available from the Turkish Statistical Institute (bilgi@tuik.gov.tr) for researchers who meet the criteria for access to confidential data. The authors of the study did not receive any special privileges in accessing the data.,Method,Yes,No,N/A,N/A,N/A,N/A,N/A,No,No,N/A,Yes,10.21203/rs.3.rs-39649/v1,21/07/2020,http://dx.doi.org/10.21203/rs.3.rs-39649/v1,Research Square
07/04/2020,2020,10.1371/journal.pone.0228771,"Cellular neuroscience,Post-translational modification,Cell biology,Cellular types,Proteins,Pathology and laboratory medicine,Microtubules,Chemical reactions,Signs and symptoms,Tubulins,Neurology,Cellular structures and organelles,Polymerization,Hypothermia,Neurons,Dementia,Alzheimer's disease,Enzymology,Chemistry,Diagnostic medicine,Medicine and health sciences,Animal cells,Cytoskeletal proteins,Enzyme inhibitors,Biochemistry,Polymer chemistry,Neurodegenerative diseases,Cytoskeleton,Neuroscience,Biology and life sciences,Mental health and psychiatry,Phosphorylation,Kinase inhibitors,Physical sciences",United States of America,All relevant data are within the paper and its Supporting Information files.,Method,Yes,Yes,Supplementary Information,N/A,N/A,N/A,Method,Yes,No,N/A,No,NA,NA,NA,NA
22/09/2021,2021,10.1371/journal.pone.0257632,"Engineering and technology,Specimen storage,Learning and memory,Science policy,COVID 19,Computer engineering,User interfaces,Software engineering,Storage and handling,Psychology,Biology and life sciences,Neuroscience,Research and analysis methods,Open source software,Medical conditions,Cognitive science,Graphical user interfaces,Viral diseases,Human learning,Open science,Electronics engineering,Computer and information sciences,Source code,Computer software,Man-computer interface,Infectious diseases,Cognitive psychology,Medicine and health sciences,Learning,Social sciences,Computer architecture",Germany,All relevant data are within the manuscript and its Supporting Information files.,Method,Yes,No,N/A,N/A,N/A,N/A,Method,Yes,No,N/A,No,NA,NA,NA,NA
11/07/2019,2019,10.1371/journal.pone.0219715,"Research and analysis methods,Yeast,Microbial pathogens,Eukaryota,Artificial gene amplification and extension,Biochemistry,Pathology and laboratory medicine,Polymerase chain reaction,Genomics,Medical microbiology,Fungi,Microbiology,Experimental organism systems,Candida albicans,Molecular biology techniques,Luminescent proteins,Mycology,Animal studies,Pathogens,Gene disruption,Fungal pathogens,Molecular biology,Plasmid construction,Yeast and fungal models,Nucleotides,Green fluorescent protein,Biology and life sciences,DNA construction,Computational biology,Genetics,Oligonucleotides,Genome analysis,Marker genes,Selection markers,Candida,Sequence assembly tools,Proteins,Organisms,Medicine and health sciences",Spain,"All the sequences from the vectors are available from the GenBank database (accession number(s) MK652110, MK652111, MK652112, MK652113, MK652114, MK652105, MK652106, MK652107, MK652108, MK652109, MK652100, MK652101, MK652102, MK652103, MK652104, MK652115, MK652116, MK652117, MK652118, MK652119, MK652120, MK652121, MK652122, MK652123, MK652124, MK652125, MK652126, MK652127, MK652128, MK652129, MK652130, MK652131, MK652132, MK652133, MK652134 and MK652135).",Method,Yes,Yes,Supplementary Information,N/A,N/A,N/A,N/A,No,No,N/A,No,NA,NA,NA,NA
31/07/2019,2019,10.1371/journal.pone.0219936,"Chemical deposition,Catalysts,Cobalt,Manufacturing processes,Iron,Electrocatalysts,Microscopy,Chemistry,Salts,Chemical compounds,Aluminum,Chemical elements,Nitrates,Research and analysis methods,Electron microscopy,Scanning electron microscopy,Physical chemistry,Surface treatments,Engineering and technology,Catalysis,Chemical vapor deposition,Sulfates,Physical sciences",Malaysia,All relevant data are within the paper.,Method,Yes,No,N/A,N/A,N/A,N/A,Method,Yes,No,N/A,No,NA,NA,NA,NA
25/03/2021,2021,10.1371/journal.pone.0247829,"Research and analysis methods,Endocrinology,Arrhythmia,Neurology,Mathematical and statistical techniques,Vascular medicine,Metabolic disorders,Reperfusion,Cerebrovascular diseases,Coronary heart disease,Statistical methods,Endocrine disorders,Cardiology,Cardiovascular disease risk,Physiology,Biology and life sciences,Physiological processes,Physical sciences,Multivariate analysis,Atrial fibrillation,Diabetes mellitus,Ischemic stroke,Mathematics,Stroke,Cardiovascular diseases,Cardiovascular medicine,Statistics,Medical conditions,Medicine and health sciences",South Korea,All relevant data are within the paper and its Supporting Information files.,Method,Yes,Yes,Supplementary Information,N/A,N/A,N/A,N/A,No,No,N/A,No,NA,NA,NA,NA
28/02/2019,2019,10.1371/journal.pone.0212790,"Materials science,Mathematics,Marine ecosystems,Seasons,Atmospheric science,Eigenvalues,Ocean temperature,Oceans,Ecology and environmental sciences,Surface temperature,Earth sciences,Linear algebra,Biology and life sciences,Surface properties,Material properties,Bodies of water,Ecology,Climate change,Ecosystems,Oceanography,Summer,Climatology,El NiÃ±o-Southern Oscillation,Algebra,Marine and aquatic sciences,Physical sciences",Iran,All data are available at: https://www.esrl.noaa.gov/psd/data/gridded/data.noaa.oisst.v2.highres.html.,Method,Yes,Yes,Online,https://www.esrl.noaa.gov/psd/data/gridded/data.noaa.oisst.v2.highres.html,N/A,N/A,Method,Yes,No,N/A,No,NA,NA,NA,NA
12/11/2021,2021,10.1371/journal.pone.0259495,"Caries,Health care,Chemical compounds,Social sciences,Biology and life sciences,Oral medicine,Economics,Digestive physiology,Oral health,Medical services,Fluorides,Health insurance,Health economics,Epidemiology,Infectious diseases,Research and analysis methods,Medical risk factors,Mathematical and statistical techniques,Medical conditions,Statistics,Dentition,Mathematics,Bacterial diseases,Forecasting,Physiology,Chemistry,Medicine and health sciences,Physical sciences,Statistical methods",The Netherlands,The data are owned by healthcare insurance company Zilveren Kruis. Due to Dutch privacy and health insurance laws and regulations it is not permitted to share the data publicly. The data are available on request to the directie Zilveren Kruis Zorgverzekeringen (Zilveren Kruis Achmea Postbus 444 2300 AK Leiden). They will check if the conditions of Dutch privacy and health insurance laws are met.,Method,Yes,Yes,Supplementary Information,N/A,N/A,N/A,N/A,No,No,N/A,No,NA,NA,NA,NA
15/04/2021,2021,10.1371/journal.pone.0249880,"Hematology,Surgical and invasive medical procedures,Oxygen,Vascular medicine,Biology and life sciences,Physical sciences,Animal studies,Research design,Chemistry,Hypoxia,Body fluids,Blood counts,Blood,Research and analysis methods,Hematocrit,Pulmonology,Medicine and health sciences,Chemical elements,Anatomy,Clinical research design,Physiology,Cell biology,Adverse events,Blood pressure,Medical hypoxia",South Korea,All relevant data are within the manuscript and its Supporting Information files.,Method,Yes,Yes,Supplementary Information,N/A,N/A,N/A,N/A,No,No,N/A,No,NA,NA,NA,NA
08/03/2019,2019,10.1371/journal.pone.0211124,"Age groups,Behavior,Schools,Biology and life sciences,Population groupings,Oceania,Psychology,Research design,Social sciences,Recreation,Sociology,Research and analysis methods,Qualitative studies,Australia,Children,Families,Aggression,Sports science,People and places,Geographical locations,Sports,Education",Australia,"Due to ethical restrictions, the full data set underlying this study (audiotapes and complete transcripts) is not available. We are not able to make this full data set available to other researchers because participants only gave consent for the present study's research team to have access to these materials. Per our ethical approval, these audiotapes and completed transcripts will be disposed of according to university guidelines when participants have reached 25 years of age. We can, however, provide independent researchers with more detail regarding coding, working notes on the analysis, and de-identified excerpts from transcripts on request. These notes include the focus group discussion guide, notes taken on original ideas, initial memos, a record of the initial coding into nodes in NVivo, exploration of the relationship between codes and themes, and the initial thematic map. Data access queries may be directed to the first three authors of this study: Helen J. Nelson (helen.nelson@postgrad.curtin.edu.au), Sharyn K. Burns (S.Burns@curtin.edu.au), and Garth E. Kendall (G.Kendall@email.curtin.edu.au). Additionally, the Curtin University Human Research Ethics Committee can act as a contact in the event of the authors not being available: ROC-ethicshth@curtin.edu.au.",Method,Yes,No,N/A,N/A,N/A,N/A,DA|Method,Yes,No,N/A,No,NA,NA,NA,NA
17/12/2020,2020,10.1371/journal.pone.0243931,"Civil engineering,Social sciences,Behavior,Psychology,Population groupings,Attention,Research and analysis methods,Professions,Sensory systems,Transportation infrastructure,Biology and life sciences,Engineering and technology,Physiology,Bioassays and physiological analysis,Sensory physiology,Visual system,Cognitive psychology,People and places,Teachers,Anatomy,Ocular anatomy,Eye movements,Ocular system,Neuroscience,Cognitive science,Roads,Transportation,Pupil,Medicine and health sciences",China,All data are available within the paper and from figshare via the following link: https://figshare.com/s/e3475845a45e80653d02.,Method,Yes,Yes,Online,https://figshare.com/s/e3475845a45e80653d02,N/A,figshare,Method,Yes,No,N/A,No,NA,NA,NA,NA
25/08/2021,2021,10.1371/journal.pone.0255535,"Medical conditions,Alcohol consumption,Fatty liver,Body weight,Endocrinology,Insulin resistance,Lipids,Diet,Physiology,Liver fibrosis,Diabetes mellitus,Endocrine physiology,Obesity,Endocrine disorders,Developmental biology,Fibrosis,Nutrition,Medicine and health sciences,Physiological parameters,Cholesterol,Gastroenterology and hepatology,Biology and life sciences,Liver diseases,Metabolic disorders,Biochemistry",South Korea,"Data are available from the Kangbuk Samsung Health Study whose authors may be contacted through the corresponding author. Unfortunately, the data are not available to be shared publicly as we do not have IRB permission for distributing publicly the data (because public availability would compromise patient confidentiality or participant privacy). The IRB No. of our Study: KBSMC2020-05-019. For additional information, please visit the Kangbuk Samusng Health Study at http://kscs.kbsmc.co.kr/ or contact Gayoung Lim (gayoung.lim@samsung.com).",Method,Yes,Yes,Online,http://kscs.kbsmc.co.kr/,N/A,N/A,N/A,No,No,N/A,No,NA,NA,NA,NA
20/07/2020,2020,10.1371/journal.pone.0236024,"Research assessment,Running,Global positioning system,Physical sciences,Sports science,Navigation,Research and analysis methods,Physiology,Psychology,Research validity,Medicine and health sciences,Biological locomotion,Physics,Behavior,Recreation,Biochemistry,Classical mechanics,Musculoskeletal system,Sports,Anatomy,Accelerometers,Bioenergetics,Acceleration,Social sciences,Electronics,Biology and life sciences,Engineering and technology",Australia,"In regards to the data availability, there are ethical confidentiality restrictions (imposed by Victoria University Human Research Ethics Committee) as well as practical reasons with the sheer size of the individual player data sets (~29,000 rows of data per match-half or ~58,000 rows of data for 1 full match player) that led us to exclude the original data set. All raw data cannot be uploaded as it contravenes our participant consent form. Given these ethical and practical restrictions, we have uploaded a supporting information file as a representative anonymized individual player movement file for one match half. This minimal anonymised data set is available at https://osf.io/t5mfh/. The DOI to the manuscript OSF publicly available repository is:10.17605/OSF.IO/T5MFH.",Method,Yes,Yes,Supplementary Information|Online,"10.17605/OSF.IO/T5MFH, https://osf.io/t5mfh/, OSF.IO/T5MFH",N/A,Open Science Framework,Method,Yes,No,N/A,No,NA,NA,NA,NA
30/06/2022,2022,10.1371/journal.pone.0270337,"Science policy,Physical sciences,Bioethics,Statistics,Metaanalysis,Mathematical and statistical techniques,Network analysis,Women's health,Epidemiology,Statistical methods,Pediatric surgery,Medicine and health sciences,Cesarean section,Research and analysis methods,Clinical medicine,Drug research and development,Pregnancy,Maternal health,Obstetric procedures,Randomized controlled trials,Clinical trials,Mathematics,Medical risk factors,Pharmacology,Computer and information sciences,Surgical and invasive medical procedures,Obstetrics and gynecology,Biology and life sciences",China,All relevant data are within the paper and its Supporting Information files.,Method,Yes,No,N/A,N/A,N/A,N/A,Method,Yes,No,N/A,No,NA,NA,NA,NA
13/02/2020,2020,10.1371/journal.pone.0228847,"Medical microbiology,Flaviviruses,Immunodeficiency viruses,Pathogens,Microbial pathogens,Infectious diseases,Virology,Viruses,Viral load,Substance abuse,Hepatitis C virus,HIV,Antiviral therapy,Metabolic disorders,Public and occupational health,RNA viruses,Vaccination and immunization,Organisms,Hepacivirus,Pathology and laboratory medicine,Retroviruses,Diabetes mellitus,Co-infections,Viral pathogens,Antiretroviral therapy,Medicine and health sciences,Endocrine disorders,Mental health and psychiatry,Substance-related disorders,Microbiology,Hepatitis viruses,Preventive medicine,Biology and life sciences,Lentivirus,Immunology,Viral transmission and infection,Endocrinology",United States of America,"The data underlying the results presented in the study are available from Trio Health and can be requested at Trio Health 7777 Fay Avenue, suite 310 La Jolla, CA, 92037 phone: (858)-771-2500 email: info@triohealth.com Based on our contracts with the study funder, the data may not be deposited into a public repository to maintain patient confidentiality.",Method,Yes,No,N/A,N/A,N/A,N/A,Method,Yes,No,N/A,No,NA,NA,NA,NA
16/03/2022,2022,10.1371/journal.pone.0265201,"Research and analysis methods,People and places,Diagnostic radiology,Mammography,Diagnostic medicine,Breast cancer,Ethnicities,Cancer detection and diagnosis,Oncology,Health screening,Asian people,Imaging techniques,Chinese people,Genitourinary tract tumors,Urology,Cancer screening,Radiology and imaging,Lung and intrathoracic tumors,Prostate cancer,Breast tumors,Cancers and neoplasms,Public and occupational health,Colorectal cancer,Population groupings,Medicine and health sciences,Prostate diseases",United States of America,All relevant data are within the manuscript and its Supporting Information files.,Method,Yes,No,N/A,N/A,N/A,N/A,Method,Yes,No,N/A,Yes,10.2196/preprints.28393,18/11/2021,http://dx.doi.org/10.2196/preprints.28393,Journal of Medical Internet Research
05/11/2020,2020,10.1371/journal.pone.0234823,"Tropical diseases,Ebola hemorrhagic fever,Urban geography,Nosocomial infections,Marine and aquatic sciences,Rivers,Geography,Africa,Medicine and health sciences,Bodies of water,Medical risk factors,Epidemiology,Viral hemorrhagic fevers,Infectious diseases,Quarantines,Ecology and environmental sciences,Towns,Sierra Leone,Geographical locations,Human geography,Aquatic environments,Social sciences,Earth sciences,Viral diseases,Neglected tropical diseases,People and places,Freshwater environments,Medical conditions",Sierra Leone,****PA@ACCEPT: data available at accept***** Anonymised versions of field and interview notes will be deposited in the institutional data depository of the London School of Hygiene and Tropical Medicine and of the National Ebola Museum and Archive at Njala University in Sierra Leone. URLs and/or doi will be supplied after acceptance of the manuscript.,Method,Yes,Yes,Supplementary Information,N/A,N/A,N/A,N/A,No,No,N/A,No,NA,NA,NA,NA
01/12/2021,2021,10.1371/journal.pone.0259272,"Surgical excision,Medicine and health sciences,Anatomy,Renal system,Genitourinary cancers,Cancer treatment,Genomics,Urinary system procedures,Prostate cancer,Surgical and invasive medical procedures,Cystectomy,Genitourinary tract tumors,Prostate diseases,Squamous cell carcinoma,Bladder,Biology and life sciences,Oncology,Urology,Cancer genomics,Genetics,Metastasis,Bladder cancer,Basic cancer research,Genomic medicine,Carcinoma,Cancers and neoplasms",Canada,All data are in the paper and the Supporting Information.,Method,Yes,No,N/A,N/A,N/A,N/A,N/A,No,No,N/A,No,NA,NA,NA,NA
13/03/2019,2019,10.1371/journal.pone.0213539,"Dementia,Signal processing,Model organisms,Neurodegenerative diseases,Mental health and psychiatry,Neuroscience,Animal studies,Biology and life sciences,Cardiovascular anatomy,Capillaries,In vivo imaging,Alzheimer's disease,Mouse models,Blood vessels,Computer and information sciences,Anatomy,Research and analysis methods,Neural networks,Mathematical and statistical techniques,Mathematical functions,Image processing,Imaging techniques,Convolution,Medicine and health sciences,Animal models,Engineering and technology,Experimental organism systems,Neurology",United States of America,We have made all data used for the analyses presented in our paper publicly available at: https://hdl.handle.net/1813/59221.,Fulltext,Yes,Yes,Supplementary Information|Online,"https://hdl.handle.net/1813/59221, https://doi.org/10.7298/X4FJ2F1D, 10.7298/X4FJ2F1D, https://github.com/mhaft/DeepVess",N/A,"Github, hdl.handle.net",N/A,No,Yes,Online,Yes,10.48550/arxiv.1801.00880,2018,https://arxiv.org/abs/1801.00880,ArXiv
21/06/2021,2021,10.1371/journal.pone.0251194,"Research assessment,Open source software,Physical sciences,Statistical data,Statistics,Computer and information sciences,Open science,Preprocessing,Research and analysis methods,Computer software,Mathematics,Software engineering,Medicine and health sciences,Statistical models,Source code,Pharmacology,Cannabis,Engineering and technology,Reproducibility,Science policy,Marijuana,Recreational drug use,Behavioral pharmacology",Germany,All results including detailed reports and code for each of the 11 papers are available in the GitLab repository https://gitlab.com/HeidiSeibold/reproducibility-study-plos-one. All files can also be accessed through the Open Science Framework (https://osf.io/xqknz).,Method,Yes,Yes,Online,"https://gitlab.com/HeidiSeibold/reproducibility-study-plos-one, https://osf.io/xqknz",N/A,"Git Lab, Open Science Framework",DA|Method,Yes,Yes,Online,No,NA,NA,NA,NA
20/12/2021,2021,10.1371/journal.pone.0260960,"Natural resources,Chlorophyll,Condensed matter physics,Pigments,Plant cells,Plant science,Plant cell biology,Stem anatomy,Physics,Agriculture,Evaporation,Physical sciences,Vaporization,Crop science,Cellular structures and organelles,Cellular types,Agronomy,Water resources,Plant anatomy,Leaves,Cell biology,Vegetable oils,Stomata,Plant products,Ecology and environmental sciences,Materials science,Agrochemicals,Materials,Organic pigments,Fertilizers,Seeds,Biology and life sciences,Phase transitions,Chloroplasts",Pakistan,All relevant data are within the paper and its Supporting Information files.,Method,Yes,Yes,Supplementary Information,N/A,N/A,N/A,Method,Yes,No,N/A,No,NA,NA,NA,NA
05/11/2020,2020,10.1371/journal.pmed.1003385,"Lipids,Biology and life sciences,Cholesterol,Diet,Meat,Medical conditions,Health care,Primary care,Fats,Proteins,Nutrition,Cardiology,Agriculture,Cardiovascular medicine,Biochemistry,Food,Cardiovascular diseases,Medicine and health sciences,Lipoproteins,Animal products",United Kingdom,"This study includes potentially sensitive participant information data collected by the research team from March 2018 to January 2019, which includes information on the clinical measurements, health conditions, medications, and dietary intake measurements (including the primary outcome measure). Anonymized version of this data is available from the corresponding author on reasonable request. This study also includes grocery shopping data from the collaborating supermarket, which were received weekly from March 2018 to January 2019. Because of contractual restrictions to the use of the grocery shopping data, it is not possible to make these data openly available outside this project but any queries can be directed to the University Research Services (carly.banner@admin.ox.ac.uk) and the Clinical Trials & Research Governance and the Health Research Authority that provided ethical approval (ctrg@admin.ox.ac.uk; nrescommittee.southcentral-oxfordc@nhs.net) Grocery shopping data were supplemented with a dataset containing the nutritional composition of foods provided by a commercial organization (Brand View). Further use of this data must be negotiated with the data owners Brand View (support@brandview.com).",Method,Yes,No,N/A,N/A,N/A,N/A,N/A,No,No,N/A,No,NA,NA,NA,NA
13/06/2022,2022,10.1371/journal.pone.0269469,"Survey research,Communications,Psychology,Advertising,Cognitive psychology,Experimental psychology,Social psychology,Social sciences,Sociology,Experimental economics,Surveys,Biology and life sciences,Neuroscience,Behavior,Social cognition,Cognitive science,Research design,Marketing,Prosocial behavior,Behavioral economics,Economics,Research and analysis methods",United States of America,Data supporting the study are available at: 10.17605/OSF.IO/C56WR.,Method,Yes,Yes,Online,"10.17605/OSF.IO/C56WR, OSF.IO/C56WR",N/A,Open Science Framework,Method,Yes,No,N/A,Yes,10.31234/osf.io/2xfsz,15/01/2022,http://dx.doi.org/10.31234/osf.io/2xfsz,PsyArXiv
30/01/2020,2020,10.1371/journal.pone.0228015,"Cancer treatment,Medicine and health sciences,Chemotaxis,Research and analysis methods,Cell motility,Oncology,Apoptosis,Cell processes,Biology and life sciences,Cancers and neoplasms,Chemokines,Developmental biology,Cell death,Imaging techniques,Cell migration,Invasive tumors,Necrotic cell death,Gastrointestinal tumors,Fluorescence imaging,Cell biology,Pancreatic cancer,Cancer cell migration",Japan,"All raw data files are available from the figshare database (URL; https://figshare.com/articles/Raw_data_for_revised_ver_/11462274), DOI: https://doi.org/10.6084/m9.figshare.11462274.v1",Method,Yes,Yes,Supplementary Information|Online,"10.6084/m9.figshare.11462274.v1, https://figshare.com/articles/Raw_data_for_revised_ver_/11462274, https://doi.org/10.6084/m9.figshare.11462274.v1",N/A,figshare,Method,Yes,No,N/A,No,NA,NA,NA,NA
30/07/2020,2020,10.1371/journal.pone.0236652,"Health care facilities,Critical care and emergency medicine,Walking,Pelvis,Population metrics,Cancer treatment,Trauma medicine,Traumatic injury,Oncology,Neck,Health care,Physiology,Bone fracture,Biology and life sciences,Population biology,Skeleton,Musculoskeletal system,Hospitals,Biological locomotion,Hip,Death rates,Surgical and invasive medical procedures,Anatomy,Medicine and health sciences",Japan,All relevant data are within the manuscript and its Supporting Information files (in Japanese).,Method,Yes,Yes,Supplementary Information,N/A,N/A,N/A,N/A,No,No,N/A,No,NA,NA,NA,NA
11/10/2021,2021,10.1371/journal.pgen.1009855,Missing,Finland,"The RNAseq data is available in GEO, with the accession number GSE166681. https://www.ncbi.nlm.nih.gov/geo/query/acc.cgi?acc=GSE166681.",Method,Yes,Yes,Supplementary Information|Online,https://www.ncbi.nlm.nih.gov/geo/query/acc.cgi?acc=GSE166681,GSE166681,Gene Expression Omnibus,Method,Yes,No,N/A,No,NA,NA,NA,NA
30/06/2021,2021,10.1371/journal.pone.0248947,"Medical dialysis,Patients,Sense of agency,People and places,Transplantation,Medicine and health sciences,Nurses,Organ transplantation,Social psychology,Urinary system procedures,Medical personnel,Surgical and invasive medical procedures,Cognitive science,Public and occupational health,Cadaveric renal transplantation,Nephrology,Cognitive psychology,Professions,Health care providers,Neuroscience,Population groupings,Social cognition,Health care,Psychology,Biology and life sciences,Behavioral and social aspects of health,Renal transplantation,Social sciences",South Korea,All relevant data are within the manuscript and its Supporting Information files.,Method,Yes,Yes,Supplementary Information,N/A,N/A,N/A,N/A,No,No,N/A,No,NA,NA,NA,NA
19/01/2021,2021,10.1371/journal.ppat.1008594,"Kaposi's sarcoma-associated herpesvirus,Cancer genomics,Herpesviruses,Molecular biology,Polymerase chain reaction,Research and analysis methods,Cancers and neoplasms,Microbiology,Basic cancer research,Genetics,Mutation,Medicine and health sciences,Human genomics,Pathology and laboratory medicine,Point mutation,Genomics,Artificial gene amplification and extension,Molecular biology techniques,Nonsense mutation,Medical microbiology,Genomic medicine,Oncology,Pathogens,Viruses,Microbial pathogens,Viral pathogens,Organisms,Biology and life sciences,DNA viruses",United States of America,"All whole KSHV genome sequence files are available from the NCBI, with GenBank Accession numbers: MT510648, MT510670, MT936340. All other relevant data are within the manuscript and its Supporting Information files.",Method,Yes,Yes,Supplementary Information,N/A,N/A,N/A,Method,Yes,No,N/A,Yes,10.1101/2020.05.04.076638,05/05/2020,http://dx.doi.org/10.1101/2020.05.04.076638,bioRxiv
30/12/2019,2019,10.1371/journal.pone.0223243,"Animal phylogenetics,Skeleton,Age groups,Genomics,Vertebrates,Biology and life sciences,Veterinary medicine,Zoology,People and places,Animal genomics,Population metrics,Pets and companion animals,Amniotes,Humerus,Taxonomy,Genetics,Musculoskeletal system,Dogs,Population groupings,Medicine and health sciences,Evolutionary biology,Mammals,Animal types,Mammalian genomics,Evolutionary systematics,Animals,Computer and information sciences,Veterinary science,Data management,Veterinary diagnostics,Eukaryota,Organisms,Age distribution,Population biology,Anatomy,Phylogenetics",United States of America,Data are available through Dryad at the following link: https://datadryad.org/stash/share/2pmIgodihcGDRmAmEimztmWZ2aiDQjtFkvq5o-VtJDs.,Method,Yes,Yes,Online,https://datadryad.org/stash/share/2pmIgodihcGDRmAmEimztmWZ2aiDQjtFkvq5o-VtJDs,N/A,Dryad Digital Repository,Method,Yes,No,N/A,No,NA,NA,NA,NA
31/12/2019,2019,10.1371/journal.pone.0226809,"Viral pathogens,Population groupings,Biology and life sciences,Families,Immunodeficiency viruses,Pathology and laboratory medicine,Pathogens,Microbial pathogens,Children,Finance,RNA viruses,Health care,Medical microbiology,Socioeconomic aspects of health,Economics,Lentivirus,Medicine and health sciences,Preventive medicine,HIV prevention,Cost-effectiveness analysis,Sociology,Education,Organisms,Viruses,Economic analysis,Retroviruses,HIV,Age groups,Public and occupational health,Schools,Mental health and psychiatry,Microbiology,Adolescents,People and places,Social sciences",United States of America,All relevant data are within the manuscript and its Supporting Information files.,Method,Yes,Yes,Supplementary Information,N/A,N/A,N/A,N/A,No,No,N/A,No,NA,NA,NA,NA
29/09/2021,2021,10.1371/journal.pone.0245180,"Medical microbiology,Medicine and health sciences,Organisms,Eukaryota,Pathogens,Microbial pathogens,Agricultural soil science,Mycology,Fungal structure,Pathology and laboratory medicine,Earth sciences,Biology and life sciences,Plant pathology,Network analysis,Agriculture,Computer and information sciences,Soil science,Fungal pathogens,Soil ecology,Bacteria,Plant pathogens,Plant fungal pathogens,Plant science,Microbiology,Fungi",China,"Single-end of 16S rRNA gene and ITS1 gene sequenced on an Ion S5TM XL platform (Wang et al., 2018) by Novogene Genomics Institute (Beijing, China). These raw reads are banked in the NCBI Sequence Read Archive (SRA) database under the accession PRJNA633325.",Method,Yes,Yes,Supplementary Information|Online,N/A,PRJNA633325,NCBI Bioproject,Method,Yes,No,N/A,Yes,10.1101/2020.12.24.424290,25/12/2020,http://dx.doi.org/10.1101/2020.12.24.424290,bioRxiv
23/06/2021,2021,10.1371/journal.pone.0253114,"Pain,Research and analysis methods,Public and occupational health,Body weight,Qualitative studies,Signs and symptoms,Database searching,Survey research,Database and informatics methods,Physiology,Physical activity,Research design,Questionnaires,Body mass index,Clinical medicine,Physiological parameters,Biology and life sciences,Medicine and health sciences,Obesity",Canada,All relevant data are within the paper and its Supporting Information files.,Method,Yes,Yes,Supplementary Information,N/A,N/A,N/A,Method,Yes,No,N/A,Yes,10.31236/osf.io/rvaw3,26/04/2021,http://dx.doi.org/10.31236/osf.io/rvaw3,SportRxiv
07/09/2021,2021,10.1371/journal.pone.0257013,"Anatomy,Research and analysis methods,Attention,Data management,Data visualization,Cognitive science,Ocular system,Retinal vessels,Ophthalmology,Artificial intelligence,Social sciences,Blood vessels,Retinopathy,Cognitive psychology,Convolution,Medical conditions,Mathematical and statistical techniques,Deep learning,Machine learning,Neuroscience,Diabetic retinopathy,Ocular anatomy,Retinal disorders,Cardiovascular anatomy,Biology and life sciences,Mathematical functions,Imaging techniques,Medicine and health sciences,Psychology,Eye diseases,Computer and information sciences",China,"DRIVE [34], CHASE-DB1 [35] and STARE [36] are open source datasets.",Method,Yes,No,N/A,N/A,N/A,N/A,N/A,No,No,N/A,No,NA,NA,NA,NA
21/06/2022,2022,10.1371/journal.pmed.1004004,"Computer and information sciences,Women's health,Radiology and imaging,Obstetrics and gynecology,Epidemiology,Diagnostic medicine,Data management,Research and analysis methods,Imaging techniques,Infographics,Neonatal care,Pediatrics,Pregnancy,Medicine and health sciences,Biology and life sciences,Stillbirths,Maternal health,Charts,Neonates,Medical risk factors,Ultrasound imaging,Diagnostic radiology,Birth,Health care,Neonatology,Data visualization,Developmental biology",United Kingdom,Data cannot be shared publicly because consent was not obtained from women; permission for sharing data was not sought as part of ethical approval. Data is only available following approval from Research Ethics Committee and Confidentiality Advisory Group. Enquiries and requests should be made to DESiGN trial team and sponsors through the Department of Women and Childrenâ€™s Health at Kingâ€™s College London (SoLCS_research@kcl.ac.uk).,Method,Yes,No,N/A,N/A,N/A,N/A,N/A,No,No,N/A,No,NA,NA,NA,NA
07/06/2021,2021,10.1371/journal.pcbi.1009028,"Psychology,Brain,Visual cortex,Sensory perception,Forecasting,Physical sciences,Cellular neuroscience,Mathematical and statistical techniques,Cognitive psychology,Medicine and health sciences,Physiological parameters,Computer and information sciences,Cognitive science,Statistics,Animal cells,Statistical methods,Social sciences,Neurons,Cell biology,Body weight,Neuroscience,Anatomy,Research and analysis methods,Perception,Neural networks,Biology and life sciences,Cellular types,Physiology,Mathematical functions,Vision,Neuronal tuning,Mathematics,Convolution",Germany,The data analyzed in this study is available in a GIN repository at https://doid.gin.g-node.org/2e31e304e03d6357c98ac735a1fe5788/ (DOI: 10.12751/g-node.2e31e3). Code is available from https://eckerlab.org/code/burg2021_learning_divisive_normalization.,Method,Yes,Yes,Online,"https://eckerlab.org/code/burg2021_learning_divisive_normalization, https://doid.gin.g-node.org/2e31e304e03d6357c98ac735a1fe5788/, 10.12751/g-node.2e31e3",N/A,"GIN, eckerlab.org",DA|Method,Yes,Yes,Online,Yes,10.1101/767285,13/09/2019,http://dx.doi.org/10.1101/767285,bioRxiv
24/01/2019,2019,10.1371/journal.pone.0211042,"Biology and life sciences,Muscle physiology,Gait analysis,Walking,Muscle analysis,Physiology,Anatomy,Pain,Abdominal muscles,Myalgia,Muscle functions,Muscles,Musculoskeletal system,Lower back pain,Biological locomotion,Signal processing,Bioassays and physiological analysis,Diagnostic medicine,Medicine and health sciences,Signal filtering,Signs and symptoms,Engineering and technology,Research and analysis methods,Pathology and laboratory medicine",Germany,All relevant data are within the manuscript and its Supporting Information files.,Method,Yes,Yes,Supplementary Information,N/A,N/A,N/A,Method,Yes,No,N/A,No,NA,NA,NA,NA
25/10/2021,2021,10.1371/journal.pone.0258658,"Neuroimaging,Applied mathematics,Decision trees,Flower anatomy,Machine learning,Schizophrenia,Software tools,Simulation and modeling,Combinatorics,Plant science,Mental health and psychiatry,Biology and life sciences,Cognitive science,Medicine and health sciences,Machine learning algorithms,Computer and information sciences,Mathematics,Artificial intelligence,Physical sciences,Plant anatomy,Research and analysis methods,Neuroscience,Cognition,Management engineering,Boosting algorithms,Permutation,Cognitive psychology,Decision making,Algorithms,Imaging techniques,Decision analysis,Psychology,Social sciences,Software engineering,Engineering and technology,Discrete mathematics,Sepals",Australia,"All Iris files are available from the UCI Machine Learning Repository (https://archive.ics.uci.edu/ml/datasets/iris) All Schizconnect files are available upon creating an account and loading the dataset from the Collaborative Informatics and Neuroimaging Suite (COINS) (https://coins.trendscenter.org/). After an account has been made with COINS, researchers can locate the Schizconnect data to download in its entirety by typing â€œCOBREâ€ into the main search panel.",Method,Yes,Yes,Online,"https://coins.trendscenter.org/, https://archive.ics.uci.edu/ml/datasets/iris",N/A,"UCI Machine Learning Repository, coins.trendscenter.org",Method,Yes,No,N/A,Yes,10.48550/arxiv.2104.03088,2021,https://arxiv.org/abs/2104.03088,ArXiv
09/07/2021,2021,10.1371/journal.pone.0254320,"Biology and life sciences,Blood cells,Blood,Cytophotometry,Physiology,Immunology,Anatomy,Total cell counting,People and places,Spectrum analysis techniques,Spectrophotometry,B cells,Cell biology,Antibody-producing cells,White blood cells,Population groupings,Flow cytometry,Memory B cells,Immune cells,Animal cells,Medicine and health sciences,Lymphocytes,Cell enumeration techniques,Research and analysis methods,Age groups,Cellular types,Body fluids",Malawi,All relevant data are within the paper and its Supporting Information files.,Method,Yes,No,N/A,N/A,N/A,N/A,N/A,No,No,N/A,No,NA,NA,NA,NA
29/09/2021,2021,10.1371/journal.pone.0256661,"Anatomy,Organisms,Body weight,Aminotransferases,Milk,Amniotes,Camels,Body fluids,Food,Vertebrates,Medicine and health sciences,Mammals,Zoology,Pathology and laboratory medicine,Biochemistry,Physiology,Animals,Nutrition,Toxicology,Eukaryota,Blood,Transferases,Proteins,Enzymology,Physiological parameters,Toxicity,Diet,Blood serum,Beverages,Enzymes,Biology and life sciences",Bulgaria,All relevant data are within the paper and its Supporting Information files.,Method,Yes,Yes,Supplementary Information,N/A,N/A,N/A,N/A,No,No,N/A,No,NA,NA,NA,NA
26/01/2021,2021,10.1371/journal.pbio.3000796,"Physiological processes,Zoology,Biology and life sciences,Medicine and health sciences,Invertebrates,Tyrosine,Hydroxyl amino acids,Body fluids,Animals,Anatomy,Eukaryota,Infectious diseases,Vertebrates,Insects,Physiology,Organic chemistry,Amino acids,Organic compounds,Aromatic amino acids,Enzymology,Medical conditions,Horses,Amniotes,Equines,Blood,Metabolic pathways,Organisms,Enzyme metabolism,Enzyme chemistry,Physical sciences,Proteins,Metabolism,Arthropoda,Entomology,Chemical compounds,Ingestion,Mammals,Chemistry,Biochemistry,Infectious disease control",Argentina,"All relevant data are within the paper and its Supporting Information files, except for the metabolomics dataset, which has been deposited into the MetaboLights repository (https://www.ebi.ac.uk/metabolights/) under accession number MTBLS2166.",Method,Yes,Yes,Supplementary Information|Online,https://www.ebi.ac.uk/metabolights/,N/A,MetaboLights,Method,Yes,No,N/A,Yes,10.1101/2020.06.08.139808,09/06/2020,http://dx.doi.org/10.1101/2020.06.08.139808,bioRxiv
16/06/2022,2022,10.1371/journal.pone.0269405,"Anatomy,Genetics,Hematologic cancers and related disorders,Neutropenia,Cloning,Oncology,Cellular types,Medicine and health sciences,Biology and life sciences,Drugs,Antimicrobials,Pharmacology,Clinical medicine,Cell biology,Immunology,Leukemia,Blood cells,Metagenomics,Molecular biology techniques,Signs and symptoms,Animal cells,White blood cells,Immune cells,Blood,Myeloid leukemia,DNA cloning,Body fluids,Sequencing techniques,Acute myeloid leukemia,Genomics,Cancers and neoplasms,Shotgun sequencing,Research and analysis methods,Microbial control,Fevers,Microbiology,Molecular biology,Physiology,Antibiotics,Hematology",United States of America,"Human reads were removed, and the raw sequence data for each sample were deposited in the Sequence Read Archive (SRA) database at the National Center for Biotechnology Information (NCBI) under BioProject accession number PRJNA674642.",Method,Yes,Yes,Online,N/A,PRJNA674642,NCBI Bioproject,N/A,No,No,N/A,No,NA,NA,NA,NA
05/05/2022,2022,10.1371/journal.pone.0267779,"Clinical trials,Physiological parameters,Adults,Biology and life sciences,Public and occupational health,Walking,Research and analysis methods,Medicine and health sciences,Randomized controlled trials,Population groupings,Sports and exercise medicine,Biological locomotion,Sports science,Physical activity,Biological tissue,Anatomy,Physiology,Adipose tissue,Pharmacology,Elderly,Connective tissue,Obesity,Drug interactions,Clinical medicine,Drug research and development,Physical fitness,People and places,Exercise,Age groups,Gait analysis,Body weight",United States of America,Data used in these analyses are 3rd party data available via request from the OAIC National Coordinating Center for the Claude D Pepper Older Americans Independence Centers https://www.peppercenter.org/. Authors were not given special access privileges to the datasets.,Method,Yes,Yes,Online,https://www.peppercenter.org/,N/A,N/A,Method,Yes,No,N/A,No,NA,NA,NA,NA
08/10/2020,2020,10.1371/journal.pone.0239316,"Organic compounds,Bark,Medicine and health sciences,Microbial control,Microbiology,Organisms,Fruits,Medicinal plants,Medical conditions,Organic chemistry,Periodontal diseases,Leaves,Oral medicine,Antimicrobials,Eukaryota,Plant science,Plants,Drugs,Oral diseases,Physical sciences,Wood,Biology and life sciences,Ethanol,Plant anatomy,Chemical compounds,Alcohols,Antibacterials,Periodontitis,Pharmacology,Chemistry",United States of America,All relevant data are within the paper and its Supporting Information files.,Method,Yes,No,N/A,N/A,N/A,N/A,Method,Yes,No,N/A,No,NA,NA,NA,NA
19/04/2019,2019,10.1371/journal.pone.0215592,Missing,United Kingdom,"Manuscript and raw data have been uploaded to the preprint server biorxiv, available at https://www.biorxiv.org/content/10.1101/456541v2, DOI: https://doi.org/10.1101/456541.",Method,Yes,Yes,Online,"https://www.biorxiv.org/content/10.1101/456541v2, 10.1101/456541v2, 10.1101/456541, https://doi.org/10.1101/456541",N/A,N/A,Method,Yes,No,N/A,Yes,10.1101/456541,30/10/2018,http://dx.doi.org/10.1101/456541,bioRxiv
23/10/2019,2019,10.1371/journal.pone.0223307,"Autumn,Built structures,Atmospheric science,Earth sciences,Summer,Physics,Climatology,Winter,Materials,Seasons,Spring,Engineering and technology,Composite materials,Materials science,Concrete,Structural engineering,Thermal stresses,Mechanical stress,Climate change,Physical sciences,Classical mechanics",United States of America,"The bridge data was obtained from the 2017 National Bridge Inventory (NBI) from the U.S. Department of Transportation â€“ Federal Highway Administration (FHWA) repository, [https://www.fhwa.dot.gov/bridge/nbi/ascii2017.cfm]. The datasets on climate and projected temperatures generated during and/or analyzed during the current study are publicly available in the NOAA repository, [https://www.ncdc.noaa.gov/cag/national/time-series]. The authors did not have special access privileges. All temperature data has been stored in Dryad and can be downloaded from [https://doi.org/10.5061/dryad.vdncjsxpz].",Method,Yes,Yes,Online,"https://www.ncdc.noaa.gov/cag/national/time-series, https://www.fhwa.dot.gov/bridge/nbi/ascii2017.cfm, 10.5061/dryad.vdncjsxpz, https://doi.org/10.5061/dryad.vdncjsxpz",N/A,"Dryad Digital Repository, ncdc.noaa.gov",Method,Yes,No,N/A,No,NA,NA,NA,NA
29/06/2022,2022,10.1371/journal.pone.0268205,"Biochemical analysis,Entomology,Eukaryota,RNA viruses,Flaviviruses,Enzyme assays,Genetics,Pathology and laboratory medicine,Biology and life sciences,West Nile virus,Microbial pathogens,Population metrics,Arthropoda,Amino acid specific chromatography,Homozygosity,Animals,Insect vectors,Medical microbiology,Insects,Insecticides,Invertebrates,Chromatographic techniques,Mosquitoes,Agrochemicals,Heredity,Pathogens,Research and analysis methods,Species interactions,Medicine and health sciences,Bioassays and physiological analysis,Medical conditions,Variant genotypes,Organisms,Agriculture,Affinity chromatography,Zoology,Viruses,Disease vectors,Infectious diseases,Glutathione chromatography,Microbiology,Viral pathogens,Death rates,Population biology,Genetic mapping",United States of America,All relevant data are within the paper and its Supporting Information files.,Method,Yes,Yes,Supplementary Information,N/A,N/A,N/A,Method|Supplementary,Yes,Yes,Supplementary Information,Yes,10.1101/2022.04.26.489519,20/05/2022,http://dx.doi.org/10.1101/2022.04.26.489519,bioRxiv
27/02/2020,2020,10.1371/journal.pntd.0008026,"Biology and life sciences,Pathogens,Nutrition,Bacteria,Microbiology,Uganda,Bacillus,Gastroenterology and hepatology,Animal products,People and places,Medicine and health sciences,Africa,Geographical locations,Diagnostic medicine,Anthrax,Agriculture,Organisms,Zoonoses,Diarrhea,Pathology and laboratory medicine,Beef,Microbial pathogens,Bacterial pathogens,Diet,Bacterial diseases,Medical microbiology,Signs and symptoms,Food,Farms,Bacillus anthracis,Meat,Livestock,Infectious diseases",Uganda,"The data that supports the findings of our work belong to the Uganda Public Health Fellowship Program and are not publicly available. However, the data are available on reasonable request and upon permission from the Uganda Public Health Fellowship Program, contact Mr. Steven Kabwama, phone: +256-753-024727, email: skabwama@musph.ac.ug.",Method,Yes,No,N/A,N/A,N/A,N/A,Method,Yes,No,N/A,No,NA,NA,NA,NA
04/12/2019,2019,10.1371/journal.pone.0225439,"Classical mechanics,Mathematics,Physics,Statistics,Fluid flow,El NiÃ±o-Southern Oscillation,Physical sciences,Oceanography,Multivariate analysis,Principal component analysis,Continuum mechanics,Eigenvalues,Earth sciences,Atmospheric science,Marine and aquatic sciences,Algebra,Fluid dynamics,Probability theory,Research and analysis methods,Engineering and technology,Covariance,Linear algebra,Fluid mechanics,Statistical methods,Singular value decomposition,Random variables,Built structures,Mathematical and statistical techniques,Climatology,Structural engineering",Canada,"We have uploaded all MATLAB generated Figures (2 through 7), and all MATLAB codes for these Figures. Here is the DOI for the GitHub repo for the University of Waterloo: (https://git.uwaterloo.ca/j9shaw/PLOS-one-2019.git). The data set has been made available at: (https://doi.org/10.5683/SP2/C5K7AJ).",N/A,No,Yes,Online,"https://git.uwaterloo.ca/j9shaw/PLOS-one-2019.git, https://doi.org/10.5683/SP2/C5K7AJ, 10.5683/SP2/C5K7AJ",N/A,"Borealis, git.uwaterloo.ca",DA|Method|Supplementary,Yes,Yes,Online,No,NA,NA,NA,NA
18/09/2020,2020,10.1371/journal.pone.0238214,"Human geography,Population metrics,Ecology and environmental sciences,Biology and life sciences,Water resources,Earth sciences,Socioeconomic aspects of health,Population biology,People and places,Sanitary engineering,Medical conditions,Social sciences,Health care,Human mobility,Epidemiology,Medicine and health sciences,Engineering and technology,Brazil,Sewage,Viral diseases,Medical risk factors,Geographical locations,Public and occupational health,South America,Geography,Infectious diseases,Natural resources,COVID 19,Life expectancy",Brazil,"OAG airline data (Brazilian airline passenger flow for the year 2019) cannot be made publicly available as itâ€™s owned by a third party. The data is part of the ""Traffic Module"" of OAGâ€™s ""Analyser"" tool. Researchers can purchase the same dataset by contacting OAG at https://www.oag.com/traffic-analyser or any other contact channel provided at OAGâ€™s website. The authors purchased a license to use this data and did not have any special access which others would not have. The remaining data is available at the repository https://gitlab.procc.fiocruz.br/mave/impact-covid19-brasil.",Method,Yes,Yes,Online,"https://www.oag.com/traffic-analyser, https://gitlab.procc.fiocruz.br/mave/impact-covid19-brasil",N/A,N/A,Method,Yes,No,N/A,Yes,10.1101/2020.03.19.20039131,23/03/2020,http://dx.doi.org/10.1101/2020.03.19.20039131,medRxiv
23/12/2021,2021,10.1371/journal.pone.0261840,"Viral pathogens,Microbial pathogens,Virus testing,Endocrinology,Medicine and health sciences,Molecular biology,People and places,Diabetes mellitus,Metabolic disorders,Research and analysis methods,Pneumonia,Pulmonology,Pathology and laboratory medicine,Diagnostic medicine,Geographical locations,Biology and life sciences,Pathogens,Artificial gene amplification and extension,Infectious diseases,Medical conditions,Viruses,Organisms,Europe,SARS coronavirus,Endocrine disorders,Medical microbiology,Microbiology,Polymerase chain reaction,Serbia,Molecular biology techniques,RNA viruses,COVID 19,Epidemiology,Reverse transcriptase-polymerase chain reaction,SARS CoV 2,Viral diseases,Coronaviruses",Serbia,All relevant data are within the manuscript and its Supporting Information Files.,Method,Yes,Yes,Supplementary Information,N/A,N/A,N/A,N/A,No,No,N/A,No,NA,NA,NA,NA
22/01/2021,2021,10.1371/journal.pone.0246006,"Medicine and health sciences,Africa,Pathogens,Infectious disease control,Infectious diseases,Coronaviruses,Pathology and laboratory medicine,Social sciences,Organisms,Physiology,People and places,Religion,Research design,Microbial pathogens,Signs and symptoms,RNA viruses,Social distancing,COVID 19,Epidemiology,Medical risk factors,Viruses,Medical microbiology,Physiological processes,Clinical medicine,Geographical locations,Sociology,Viral pathogens,Cross-sectional studies,Viral diseases,Ethiopia,Coughing,Research and analysis methods,Anthropology,Medical conditions,Microbiology,Cultural anthropology,Biology and life sciences",Ethiopia,"The data underlying the results contain the potential identification of our study participants and have some ethical restrictions as set by the ethical review committee of Debre Berhan University. However, the row datasets will be available from the chairman of ethics committee of college of health science, Debre Berhan University on a reasonable request (hilinak@dbu.edu.et). The corresponding author listed below have agreed, seen and approved the manuscript for submission.",Method,Yes,No,N/A,N/A,N/A,N/A,N/A,No,No,N/A,Yes,10.21203/rs.2.12234/v1,23/09/2019,http://dx.doi.org/10.21203/rs.2.12234/v1,Research Square
08/04/2019,2019,10.1371/journal.pone.0214967,"Pediatric surgery,Biology and life sciences,Neonates,Public and occupational health,Medicine and health sciences,Congenital disorders,Signs and symptoms,Developmental biology,Sociology,Educational attainment,Neonatology,Pathology and laboratory medicine,Pediatrics,Education,Surgical and invasive medical procedures,Social sciences,Health care,Diagnostic medicine,Sepsis,Congenital anomalies,Socioeconomic aspects of health,Neonatal care",Germany,All relevant data are within the manuscript.,Method,Yes,Yes,Supplementary Information,N/A,N/A,N/A,Method,Yes,No,N/A,No,NA,NA,NA,NA
16/01/2019,2019,10.1371/journal.pone.0210286,"Engineering and technology,Monosaccharides,Research and analysis methods,Molecular dialysis,Organic compounds,Electronics,Polymer chemistry,Materials science,Electrodes,Polymers,Electrochemistry,Membrane dialysis,Pressure,Organic chemistry,Reference electrodes,Membrane technology,Carbohydrates,Physics,Osmotic pressure,Separation processes,Classical mechanics,Macromolecules,Physical sciences,Acrylics,Fluidics,Glucose,Sucrose,Disaccharides,Chemical compounds,Microfluidics,Electrode potentials,Materials,Chemistry",United States of America,All relevant data are within the manuscript and its Supporting Information files.,Method,Yes,No,N/A,N/A,N/A,N/A,Method,Yes,No,N/A,No,NA,NA,NA,NA
03/10/2019,2019,10.1371/journal.pone.0222392,"Gastrointestinal tract,Staining,Cellular types,Cell biology,Epithelial cells,Biological tissue,Nuclear staining,Cancers and neoplasms,Carcinomas,Colon adenocarcinoma,Digestive system,Cell processes,Immunohistochemistry techniques,Immunologic techniques,Medicine and health sciences,Animal cells,Oncology,Colorectal cancer,Histochemistry and cytochemistry techniques,Epithelium,Specimen preparation and treatment,Research and analysis methods,Colon,Anatomy,Cancer treatment,Biology and life sciences,Adenocarcinomas,Cell proliferation,Gastrointestinal tumors",United States of America,"TCGA data used in the study is third-party data accessed through cBioPortal (https://www.cbioportal.org/). The study queried was cbioportal ""Bowelâ€ studies, (Colorectal Adenocarcinoma; TCGA, Provisional-640 samples). The authors confirm they did not have any special access to this data that other researchers would not have. All other relevant data supporting study findings is available within the manuscript and its Supporting Information files.",Method,Yes,Yes,Supplementary Information|Online,https://www.cbioportal.org/,N/A,N/A,N/A,No,No,N/A,No,NA,NA,NA,NA
05/06/2020,2020,10.1371/journal.pone.0234213,"Agriculture,Financial management,Finance,Social sciences,Climatology,Drought,Probability distribution,Flooding,Population groupings,Budgets,Probability theory,Physical sciences,People and places,Agricultural workers,Mathematics,Atmospheric science,Biology and life sciences,Hydrology,Professions,Economics,Climate change,Earth sciences,Ecology and environmental sciences",Turkey,All relevant data are within the manuscript.,Fulltext,Yes,No,N/A,N/A,N/A,N/A,N/A,No,No,N/A,No,NA,NA,NA,NA
02/09/2021,2021,10.1371/journal.pone.0256766,"Biology and life sciences,Visible light,Sensory systems,Social sciences,Video games,Sensory perception,Luminance,Target detection,Physiology,Sensory physiology,Anatomy,Vision,Physics,Behavior,Cognitive science,Computer and information sciences,Cognitive psychology,Visual system,Physical sciences,Light,Recreation,Attention,Perception,Neuroscience,Medicine and health sciences,Electromagnetic radiation,Games,Ocular system,Psychology,Eyes,Computer vision,Head,Eye movements",France,All relevant data are within the manuscript and its S1â€“S4 Data files.,Method,Yes,Yes,Supplementary Information,N/A,N/A,N/A,Method,Yes,No,N/A,No,NA,NA,NA,NA
02/07/2020,2020,10.1371/journal.pone.0235558,"People and places,Psychometrics,Memory,Learning and memory,Neuroscience,Cognitive science,Population groupings,Medicine and health sciences,Cognition,Finance,Metacognition,Health education and awareness,Decision making,Biology and life sciences,Economics,Psychology,Age groups,Social sciences,Cognitive psychology,Health care,Elderly",United States of America,All relevant data are within the paper and its Supporting Information files. SPSS Data has been attached under the 'Other' category.,Method,Yes,Yes,Supplementary Information,N/A,N/A,N/A,N/A,No,No,N/A,Yes,10.21203/rs.3.rs-227286/v1,16/02/2021,http://dx.doi.org/10.21203/rs.3.rs-227286/v1,Research Square
14/04/2022,2022,10.1371/journal.pone.0267120,"Physical sciences,Mathematics,Medicine and health sciences,Physics,Anatomy,Musculoskeletal system,Physiology,Biochemistry,Research and analysis methods,Bioenergetics,Chemical characterization,Physiological processes,Biology and life sciences,Body limbs,Knees,Calorimetry,Classical mechanics,Metabolism,Indirect calorimetry,Optimization,Skeleton,Biological locomotion,Skeletal joints,Motion,Legs,Walking,Torque,Energy metabolism",United States of America,All relevant data files are available from the figshare database (https://doi.org/10.6084/m9.figshare.16926133.v1).,Method,Yes,Yes,Supplementary Information|Online,"10.6084/m9.figshare.16926133.v1, https://doi.org/10.6084/m9.figshare.16926133.v1",N/A,figshare,Method,Yes,No,N/A,No,NA,NA,NA,NA
19/08/2021,2021,10.1371/journal.pone.0256418,"Social sciences,Anthropology,Mathematics,Regression analysis,Statistics,Geographical locations,Ethnicities,Population groupings,Religion,Research and analysis methods,Physical sciences,Statistical methods,African people,Engineering and technology,Hygiene,Cultural anthropology,Africa,Public and occupational health,People and places,Sociology,Software engineering,Computer software,Ethiopia,Mathematical and statistical techniques,Health care,Health education and awareness,Socioeconomic aspects of health,Computer and information sciences,Medicine and health sciences,Amhara people",Ethiopia,All relevant data are within the manuscript and its Supporting information files.,Method,Yes,Yes,Supplementary Information,N/A,N/A,N/A,N/A,No,No,N/A,No,NA,NA,NA,NA
16/06/2022,2022,10.1371/journal.pone.0267560,"Molecular biology,Crystallography,Biology and life sciences,Macromolecular structure analysis,Biochemistry,Condensed matter physics,Protein structure determination,Alpha helix,Crystal structure,Chemical bonding,Proteins,Protein structure,Protein structure prediction,Chromophores,Physical sciences,Chemistry,Solid state physics,Physical chemistry,Protein structure comparison,Hydrogen bonding,Physics",United States of America,All relevant data are within the paper and its Supporting Information files.,Method,Yes,Yes,Supplementary Information,N/A,N/A,N/A,Method|Supplementary,Yes,No,N/A,Yes,10.1101/2022.01.31.478551,02/02/2022,http://dx.doi.org/10.1101/2022.01.31.478551,bioRxiv
11/03/2022,2022,10.1371/journal.pone.0265215,"Body limbs,Feet,Toes,Gait analysis,Kinematics,Walking,Classical mechanics,Anatomy,Musculoskeletal system,Physics,Physiology,Legs,Health care,Physical sciences,Biological locomotion,Knees,Biology and life sciences,Geriatric care,Skeleton,Medicine and health sciences,Skeletal joints",Japan,All relevant data are within the paper and its Supporting Information files.,Method,Yes,Yes,Supplementary Information,N/A,N/A,N/A,Method,Yes,No,N/A,Yes,10.1101/2021.08.16.455774,17/08/2021,http://dx.doi.org/10.1101/2021.08.16.455774,bioRxiv
22/01/2019,2019,10.1371/journal.pone.0210864,"Cytoskeletal proteins,Molecular biology,Research and analysis methods,Sequence motif analysis,Microtubules,Cytoskeleton,Cellular neuroscience,Hyperexpression techniques,Cellular structures and organelles,Biochemistry,Neuroscience,Cell processes,Microtubule-associated proteins,Medicine and health sciences,Gene expression and vector techniques,Mouse models,Proteins,Physiology,Secretion,Neurons,Animal cells,Molecular biology techniques,Protein transport,Model organisms,Database and informatics methods,Tau protein,Molecular biology assays and analysis techniques,Protein secretion,Animal studies,Sequence analysis,Cellular types,Cell biology,Biology and life sciences,Bioinformatics,Physiological processes,Experimental organism systems,Animal models",Spain,All relevant data are within the manuscript and its Supporting Information files.,Method,Yes,No,N/A,N/A,N/A,N/A,N/A,No,No,N/A,No,NA,NA,NA,NA
11/02/2021,2021,10.1371/journal.pcbi.1008697,"Optimization,Engineering and technology,Ellipses,Software engineering,Geometry,Simulation and modeling,Physical sciences,Computer software,Open source software,Kinematics,Classical mechanics,Open science,Imaging techniques,Algorithms,Physics,Applied mathematics,Signal processing,Computer and information sciences,Research and analysis methods,Science policy,Mathematics,Image processing",France,All data files are available from the TD2 database (http://data.ljp.upmc.fr/datasets/TD2/).,Fulltext,Yes,Yes,Supplementary Information|Online,"http://www.fasttrack.sh, https://idtrackerai.readthedocs.io/en/latest/data.html, http://data.ljp.upmc.fr/datasets/TD2/, http://data.ljp.upmc.fr/datasets/TD2, http://www.fasttrack.sh/API/index.html, https://sourceforge.net/projects/toxtrac/files/ScientificReports/, https://github.com/FastTrackOrg/FastTrack",N/A,"SourceForge, Github",Supplementary,Yes,Yes,Online,Yes,10.48550/arxiv.2011.06837,2020,https://arxiv.org/abs/2011.06837,ArXiv
22/10/2019,2019,10.1371/journal.pone.0222196,"Geographical locations,Biology and life sciences,Liver fibrosis,Microbial pathogens,Viruses,Oncology,People and places,Hepatitis C virus,Taiwan,Flaviviruses,Hepatitis B virus,Gastroenterology and hepatology,Medicine and health sciences,Gastrointestinal tumors,Carcinomas,Cancers and neoplasms,Microbiology,Hepatocellular carcinoma,Chronic liver disease,Hepacivirus,RNA viruses,Organisms,Viral pathogens,Medical microbiology,Asia,Pathology and laboratory medicine,Pathogens,Hepatitis viruses,Chronic hepatitis,Liver diseases",Taiwan,"Data cannot be shared publicly because of the policy of Chang Gung Memorial Hospital. Data are available from the Chang Gung Memorial Hospital Institutional Data Access for researchers who meet the criteria for access to confidential data. Queries related to data access may by submitted to: Miss Chih-Yun Lin Biostatistics center, Kaohsiung Chang Gung Memorial Hospital 123 Ta-Pei Rd, Niao-Sung 833, Kaohsiung City, Taiwan Tel: +886-7-7317123 ext. 6156 e-mail: cy1130@cgmh.org.tw.",Method,Yes,No,N/A,N/A,N/A,N/A,N/A,No,No,N/A,No,NA,NA,NA,NA
09/04/2020,2020,10.1371/journal.pone.0230064,"Cancers and neoplasms,Atrophy,Gastrointestinal infections,Signs and symptoms,Organisms,Medical microbiology,Bhutan,Medicine and health sciences,Gastrointestinal tumors,Biology and life sciences,Diagnostic medicine,Gastritis,Bacterial pathogens,Oncology,Biomarkers,Asia,Helicobacter,Helicobacter pylori,Oceania,Microbiology,Microbial pathogens,Gastroenterology and hepatology,Biochemistry,Geographical locations,Bacteria,People and places,Indonesia,Gastric cancer,Pathology and laboratory medicine,Pathogens",Japan,All relevant data are within the paper and its Supporting Information files.,Method,Yes,No,N/A,N/A,N/A,N/A,N/A,No,No,N/A,No,NA,NA,NA,NA
20/05/2020,2020,10.1371/journal.pone.0232844,"Breast cancer,Cancers and neoplasms,Prostate diseases,People and places,United Kingdom,Health statistics,Urology,Neoplasms,Geographical locations,Medicine and health sciences,Population groupings,Lung and intrathoracic tumors,England,Breast tumors,Age groups,Europe,Prostate cancer,Morbidity,Genitourinary tract tumors,European Union,Oncology,Colorectal cancer,Health care",United Kingdom,"The data underlying the results presented in the study are publicly available from the Office for National Statistics of the UK. The data set, ""Cancer incidence in England, 1971 to 2016,"" is available from: https://www.ons.gov.uk/peoplepopulationandcommunity/healthandsocialcare/conditionsanddiseases/adhocs/009055cancerincidenceinengland1971to2016.",Method,Yes,Yes,Online,https://www.ons.gov.uk/peoplepopulationandcommunity/healthandsocialcare/conditionsanddiseases/adhocs/009055cancerincidenceinengland1971to2016,N/A,N/A,Method,Yes,No,N/A,No,NA,NA,NA,NA
02/12/2021,2021,10.1371/journal.pone.0260010,"Viral pathogens,Microbial pathogens,Rhesus monkeys,Research and analysis methods,Microbiology,Experimental organism systems,Ecology,White blood cells,Primates,Animals,RNA viruses,Pathogens,Immunology,T cells,Ecology and environmental sciences,Eukaryota,Viral replication,Molecular biology techniques,Pathology and laboratory medicine,Artificial gene amplification and extension,Species diversity,Organisms,Medicine and health sciences,Immune cells,Reverse transcriptase-polymerase chain reaction,Monkeys,Animal cells,Lentivirus,Old World monkeys,Macaque,Animal studies,Zoology,Viruses,Polymerase chain reaction,Blood cells,Vertebrates,Animal models,Biology and life sciences,Mammals,Immunodeficiency viruses,Amniotes,Virology,Ecological metrics,SIV,Retroviruses,Cellular types,Cell biology,Molecular biology,Medical microbiology",United States of America,"The dataset supporting the conclusions of this article is available in the Genbank repository, accession number PRJNA716664, https://dataview.ncbi.nlm.nih.gov/object/PRJNA716664. FASTQ files located within PRJNA716664 were analyzed using the in-house code used for this study is available on Github, https://github.com/rvmoriarty/SIV_Transmission.",Method,Yes,Yes,Supplementary Information|Online,"https://github.com/rvmoriarty/SIV_Transmission, https://dataview.ncbi.nlm.nih.gov/object/PRJNA716664",PRJNA716664,Github,DA|Method,Yes,Yes,Online,Yes,10.20944/preprints202105.0206.v1,11/05/2021,http://dx.doi.org/10.20944/preprints202105.0206.v1,Preprints.org
05/07/2022,2022,10.1371/journal.pntd.0010566,"Eukaryota,Zika virus,Vertebrates,Organisms,Amniotes,Viral pathogens,Viruses,Sexually transmitted diseases,RNA viruses,Pathology and laboratory medicine,Animals,Exocrine glands,Seminal vesicles,Reproductive system,Genital anatomy,Biology and life sciences,Body fluids,Viral diseases,Medicine and health sciences,Macaque,Primates,Medical conditions,Microbial pathogens,Semen,Monkeys,Zoology,Infectious diseases,Microbiology,Prostate gland,Flaviviruses,Physiology,Mammals,Old World monkeys,Medical microbiology,Viremia,Epididymis,Pathogens,Anatomy",United States of America,All relevant data are within the manuscript and its Supporting Information files. Raw data is located at this link: https://ucdavis.box.com/s/sdp0yok8bj6et3ikp3kdowkliqlbnd8u.,Method,Yes,Yes,Online,https://ucdavis.box.com/s/sdp0yok8bj6et3ikp3kdowkliqlbnd8u,N/A,N/A,Method,Yes,No,N/A,Yes,10.1101/2022.03.03.482872,05/03/2022,http://dx.doi.org/10.1101/2022.03.03.482872,bioRxiv
01/04/2020,2020,10.1371/journal.pone.0230908,"Bodies of water,Urban ecology,Water pollution,Hydrology,Ecology,Mixtures,Urban runoff,Earth sciences,Ecology and environmental sciences,Materials science,Environmental chemistry,Water quality,Physical sciences,Particulates,Pollutants,Ponds,Surface water,Chemistry,Marine and aquatic sciences,Biology and life sciences,Materials,Pollution",United States of America,All relevant data are within the manuscript and within the supporting information files.,Method,Yes,Yes,Supplementary Information,N/A,N/A,N/A,Method,Yes,No,N/A,No,NA,NA,NA,NA
09/09/2020,2020,10.1371/journal.pone.0238465,"Biochemistry,Ovaries,Body weight,Body fluids,Physiology,Lipid hormones,Brain,Peptide hormones,Progesterone,Anatomy,Nutrition,Hypothalamus,Medicine and health sciences,Biology and life sciences,Diet,Blood,Ghrelin,Hormones,Blood plasma,Physiological parameters,Reproductive system",United States of America,All relevant data are within the paper and supporting information files.,Method,Yes,Yes,Supplementary Information,N/A,N/A,N/A,Method,Yes,No,N/A,No,NA,NA,NA,NA
16/05/2022,2022,10.1371/journal.pgph.0000086,"Molecular biology techniques,SARS CoV 2,RNA viruses,Pathology and laboratory medicine,Economics,Viral pathogens,Polymerase chain reaction,Physical sciences,Epidemiology,COVID 19,Virus testing,Research and analysis methods,Coronaviruses,Microbial pathogens,Medical microbiology,Artificial gene amplification and extension,Medical conditions,Viruses,Biology and life sciences,Mathematics,Reverse transcriptase-polymerase chain reaction,Low and middle income countries,Organisms,Pandemics,Social sciences,Diagnostic medicine,Simulation and modeling,Applied mathematics,Geography,Viral diseases,Pathogens,Molecular biology,Algorithms,Microbiology,Medicine and health sciences,Economic geography,Earth sciences,SARS coronavirus,Infectious diseases",United States of America,R code and associated data files are available openly (link: https://doi.org/10.6084/m9.figshare.c.5721038.v2).,Method,Yes,Yes,Online,"10.6084/m9.figshare.c.5721038.v2, https://doi.org/10.6084/m9.figshare.c.5721038.v2",N/A,figshare,DA|Method,Yes,Yes,Online,Yes,10.1101/2021.04.26.21256154,28/04/2021,http://dx.doi.org/10.1101/2021.04.26.21256154,medRxiv
02/04/2021,2021,10.1371/journal.pntd.0009329,"Leprosy,Bacterial diseases,Cultural anthropology,Earth sciences,Social sciences,Neglected tropical diseases,Geography,Language,Pilot studies,Neuroscience,Cognitive science,Tropical diseases,Research and analysis methods,Cognitive psychology,Geographic areas,Anthropology,Research design,Social discrimination,Sociology,Health care,Psychology,Religion,Human geography,Human families,Urban areas,Infectious diseases,Biology and life sciences,Urban geography,Medicine and health sciences,Medical conditions,Quality of life",The Netherlands,All data underlying the findings are available from the Infolep website: https://www.infontd.org/sites/default/files/2021-02/Resilience study database.txt.,Method,Yes,Yes,Supplementary Information|Online,https://www.infontd.org/sites/default/files/2021-02/Resilience,N/A,N/A,N/A,No,No,N/A,No,NA,NA,NA,NA
05/08/2021,2021,10.1371/journal.pgen.1009722,"Phenotypes,Organisms,Forecasting,Evolutionary biology,Evolutionary genetics,Statistical methods,Glycobiology,Mathematics,Biology and life sciences,Mathematical and statistical techniques,Biochemistry,Statistics,Pseudomonas fluorescens,Organismal evolution,Microbial evolution,Bacteria,Mutation,Research and analysis methods,Pseudomonas,Physical sciences,Exopolysaccharides,Deletion mutation,Microbiology,Genetics,Polysaccharides",Sweden,"All relevant data are within the manuscript and its Supporting Information files. All Illumina sequencing files are available from the NCBI database (accession number(s) PRJNA737653, https://www.ncbi.nlm.nih.gov/sra/PRJNA737653).",Method,Yes,Yes,Supplementary Information|Online,https://www.ncbi.nlm.nih.gov/sra/PRJNA737653,PRJNA737653,NCBI Sequence Read Archive,N/A,No,No,N/A,Yes,10.1101/342261,08/06/2018,http://dx.doi.org/10.1101/342261,bioRxiv
10/12/2020,2020,10.1371/journal.pone.0243393,"Imaging techniques,Alcohols,Speciation,Brazil,Chemistry,Morphometry,Research and analysis methods,Controlled vocabularies,Cryptic speciation,Chemical compounds,Physical sciences,Organic compounds,People and places,Life cycles,Evolutionary processes,Nymphs,Data management,Geographical locations,South America,Ethanol,Developmental biology,Taxonomy,Species delimitation,Organic chemistry,Computer and information sciences,Evolutionary biology,Biology and life sciences",Brazil,The accession numbers to the COI sequences in GenBank are listed in the S1 Table file.,Method,Yes,Yes,Supplementary Information,N/A,N/A,N/A,Method|Supplementary,Yes,Yes,Supplementary Information,No,NA,NA,NA,NA
25/04/2019,2019,10.1371/journal.pone.0215907,"Population groupings,Geriatric depression,Geriatric psychiatry,China,Psychology,Behavior,Geriatrics,Ethnicities,Mental health and psychiatry,Biology and life sciences,Social sciences,Asia,Depression,Elderly,People and places,Age groups,Medicine and health sciences,Geographical locations,Mood disorders,Chinese people",Germany,Data are from the China Health and Retirement Longitudinal Study (CHARLS) and are publicly available from the CHARLS website http://charls.pku.edu.cn/en/page/data.,Method,Yes,Yes,Online,http://charls.pku.edu.cn/en/page/data,N/A,N/A,Method,Yes,No,N/A,No,NA,NA,NA,NA
01/08/2022,2022,10.1371/journal.pone.0267776,"Biology and life sciences,Neonatology,Antimicrobials,Parasitic diseases,Infectious diseases,Birth,Population metrics,Antibiotics,Developmental biology,Health care,Microbiology,Medical conditions,Death rates,Obstetrics and gynecology,Labor and delivery,Infectious disease control,Population biology,Neonatal care,Women's health,Pediatrics,Drugs,Tropical diseases,Medicine and health sciences,Neonates,Microbial control,Maternal health,Vaccines,Malaria,Pharmacology",Ghana,The data used are available in the Lives Saved Tool available at www.avenirhealth.org.,Method,Yes,Yes,Online,www.avenirhealth.org,N/A,N/A,N/A,No,No,N/A,Yes,10.21203/rs.3.rs-157781/v1,06/02/2021,http://dx.doi.org/10.21203/rs.3.rs-157781/v1,Research Square
28/08/2019,2019,10.1371/journal.pone.0221828,"Microbiome,Model organisms,Signs and symptoms,Genomics,Medical microbiology,Medicine and health sciences,Carbohydrate metabolism,Immune response,Nutrition,Diet,Biology and life sciences,Diagnostic medicine,Metabolism,Glucose metabolism,Neurology,Mouse models,Metabolites,Dementia,Mental health and psychiatry,Neurodegenerative diseases,Microbial genomics,Research and analysis methods,Animal studies,Microbiology,Genetics,Pharmacokinetics,Experimental organism systems,Immunology,Drug metabolism,Animal models,Biochemistry,Alzheimer's disease,Pharmacology,Inflammation,Pathology and laboratory medicine",United States of America,The microbiome gene amplicon sequence data are available atNCBI BioProject database (PRJNA540508). All other relevant data are within the paper.,Method,Yes,Yes,Online,N/A,PRJNA540508,NCBI Bioproject,Method,Yes,No,N/A,No,NA,NA,NA,NA
01/03/2022,2022,10.1371/journal.pntd.0010235,"Geography,Mathematics,Asia,Infectious disease control,Rural areas,Mathematical and statistical techniques,People and places,Clinical research design,Population biology,Biology and life sciences,Bangladesh,Geographical locations,Statistics,Medicine and health sciences,Survival analysis,Medical conditions,Preventive medicine,Public and occupational health,Statistical methods,Geographic areas,Tetanus,Death rates,Infectious diseases,Physical sciences,Regression analysis,Immunology,Research and analysis methods,Earth sciences,Booster doses,Research design,Vaccines,Bacterial diseases,Vaccination and immunization,Population metrics",Bangladesh,All relevant data are within the manuscript and its Supporting Information files.,Method,Yes,No,N/A,N/A,N/A,N/A,N/A,No,No,N/A,No,NA,NA,NA,NA
04/11/2020,2020,10.1371/journal.pone.0242131,"Reptiles,Engineering and technology,Systems science,Turtles,Research and analysis methods,Testudines,Animals,Imaging techniques,Simulation and modeling,Infectious diseases,Eukaryota,Mathematics,Computer and information sciences,Physical sciences,Medical risk factors,Medical conditions,Medicine and health sciences,Organisms,Epidemiology,Video recording,Transportation infrastructure,Transportation,Social distancing,Viral diseases,Zoology,Civil engineering,Vertebrates,Infectious disease control,Biology and life sciences,Amniotes,Agent-based modeling,COVID 19,Airports",Romania,All relevant data are within the manuscript and its Supporting Information files.,Method,Yes,Yes,Supplementary Information,N/A,N/A,N/A,Method,Yes,No,N/A,No,NA,NA,NA,NA
22/01/2019,2019,10.1371/journal.ppat.1007537,"Materials science,Molecular biology,Enzyme regulation,Crystallization,Enzymology,Enzymes,Microbiology,Pseudomonas aeruginosa,Chemical reactions,Enzyme chemistry,Bacteria,Biochemistry,Medicine and health sciences,Macromolecular structure analysis,Oligomers,Physics,Chemistry,Bacterial pathogens,Pathology and laboratory medicine,Proteins,Chemical precipitation,Materials,Medical microbiology,Pathogens,Pseudomonas,Microbial pathogens,Solid state physics,Staphylococcus aureus,Physical sciences,Dimers,Organisms,Protein structure,Biology and life sciences,Crystallography,Polymer chemistry,Crystal structure,Staphylococcus,Condensed matter physics",United Kingdom,"Structure coordinates were deposited in the Protein Database, under PDB codes 6GYW (nucleotide-free DacACD), 6GYX (ApCpp-bound DacACD), 6GYY (DacACD-C mutant), 6GYZ (GlmM). SAXS models were deposited in the SASBDB database, under accession codes SASDE78 (DacACD/GlmM complex), SASDE88 (GlmM) and SASDE98 (DacACD). These data have been released under the following links: https://www.rcsb.org/structure/6GYW https://www.rcsb.org/structure/6GYX https://www.rcsb.org/structure/6GYZ https://www.sasbdb.org/search/?q=SASDE78 https://www.sasbdb.org/search/?q=SASDE88 https://www.sasbdb.org/search/?q=SASDE98.",Method,Yes,Yes,Supplementary Information|Online,"https://www.sasbdb.org/search/?q=SASDE98, https://www.rcsb.org/structure/6GYX, https://www.rcsb.org/structure/6GYW, https://www.rcsb.org/structure/6GYZ, https://www.sasbdb.org/search/?q=SASDE78, https://www.sasbdb.org/search/?q=SASDE88",N/A,"RCSB Protein Data Bank, sasbdb.org",DA|Method,Yes,Yes,Online,No,NA,NA,NA,NA
08/06/2022,2022,10.1371/journal.pone.0269730,"Social networks,Epidemiology,Engineering and technology,Internet,Social media,Computer networks,Cell phones,Sex work,Communications,Communication equipment,Sociology,Social sciences,Medicine and health sciences,Social communication,Facebook,Computer and information sciences,Twitter,Sexual and gender issues,Medical risk factors,Equipment,Network analysis",Canada,"Data cannot be shared publicly because our participants were individuals who are stigmatized and engaged in activity that is not legally endorsed. Data are available from the the Research Ethics Manager, Health Sciences Research Oversight & Compliance Office (ROCO) at the University of Toronto via (416) 978-3165 and ""d.gyewu@utoronto.ca"" (Daniel Gyewu) for researchers who meet the criteria for access to confidential data.",Method,Yes,No,N/A,N/A,N/A,N/A,Method,Yes,No,N/A,Yes,10.2196/preprints.26085,30/11/2020,http://dx.doi.org/10.2196/preprints.26085,Journal of Medical Internet Research
19/11/2021,2021,10.1371/journal.pone.0260097,"Plant breeding,Data management,Phylogenetic analysis,Genetics,Biology and life sciences,Phylogenetics,Species diversity,Genetic loci,Computer and information sciences,Shannon index,Agronomy,Population genetics,Alleles,Ecological metrics,Phenotypes,Evolutionary biology,Genetic polymorphism,Ecology,Ecology and environmental sciences,Agriculture,Evolutionary systematics,Taxonomy,Population biology",China,All relevant data are within the paper and its Supporting Information files.,Method,Yes,No,N/A,N/A,N/A,N/A,Method,Yes,No,N/A,No,NA,NA,NA,NA
24/01/2020,2020,10.1371/journal.pone.0227946,"Cryopreservation,Cellular types,Sperm,Crystals,Materials,Specimen preparation and treatment,Research and analysis methods,Materials science,Bioenergetics,Physical sciences,Biochemistry,Mitochondrial membrane,Cryobiology,Cellular structures and organelles,Cell biology,Specimen preservation,Energy-producing organelles,Acrosomes,Biology and life sciences,Sperm head,Cell membranes,Animal cells,Mitochondria,Germ cells",Spain,All relevant data are within the paper and its Supporting Information files.,Method,Yes,No,N/A,N/A,N/A,N/A,N/A,No,No,N/A,No,NA,NA,NA,NA
27/08/2019,2019,10.1371/journal.pone.0221132,"Neurochemistry,Neurotransmitters,Ion channels,Pharmaceutics,Neurophysiology,Proteins,Electrophysiology,Medicine and health sciences,Drug synthesis,Pharmaceutical processing technology,Noncompetitive inhibitors,Molecular biology techniques,Biology and life sciences,Physics,Biochemistry,Transfection,Neuroscience,Physiology,Ligand-gated ion channels,Research and analysis methods,Drug therapy,Molecular biology,Glutamate,Physical sciences,Enzymology,Biophysics,Enzyme inhibitors",Palestine,All relevant data are within the manuscript and its in the Supporting Information files.,Method,Yes,Yes,Supplementary Information,N/A,N/A,N/A,Method|Supplementary,Yes,No,N/A,No,NA,NA,NA,NA
29/07/2021,2021,10.1371/journal.pone.0254907,"Metabolic disorders,Behavioral and social aspects of health,Physiological parameters,Medical conditions,Vascular medicine,Public and occupational health,Body weight,Medical risk factors,Dyslipidemia,Epidemiology,Coronary heart disease,Physiology,Physical activity,Health screening,Cardiovascular diseases,Biology and life sciences,Medicine and health sciences,Cardiology,Cardiovascular medicine",South Korea,All relevant data are within the manuscript.,Method,Yes,Yes,Supplementary Information,N/A,N/A,N/A,N/A,No,No,N/A,No,NA,NA,NA,NA
13/07/2021,2021,10.1371/journal.pone.0250540,"Social sciences,Genetics,Behavior,Mathematics,Information theory,Epigenetics,Trophic interactions,Psychology,Developmental biology,Physical sciences,Ecology,Biology and life sciences,Probability theory,Ecology and environmental sciences,Probability distribution,Phenotypes,Organism development,Community ecology,Predation,Morphogenesis,Computer and information sciences",United States of America,The computer code used for the models is provided in the Supplemental Information (S4 and S5 Appendices).,Method,Yes,No,N/A,N/A,N/A,N/A,DA|Supplementary,Yes,Yes,Supplementary Information,No,NA,NA,NA,NA
24/04/2019,2019,10.1371/journal.pone.0215335,Missing,The Netherlands,All relevant data are within the manuscript and Supporting Information files.,Method,Yes,Yes,Supplementary Information,N/A,N/A,N/A,Method,Yes,No,N/A,No,NA,NA,NA,NA
22/12/2021,2021,10.1371/journal.pgph.0000031,"Viral pathogens,Microbial pathogens,HIV,Endocrinology,Medicine and health sciences,Health care facilities,Diabetes mellitus,Metabolic disorders,Bacterial diseases,HIV epidemiology,Lentivirus,Oncology,Chronic kidney disease,Pathology and laboratory medicine,Cervical cancer,Biology and life sciences,Tropical diseases,Cancers and neoplasms,Pathogens,Nephrology,Infectious diseases,Medical conditions,Health care,Viruses,Organisms,Gynecological tumors,Endocrine disorders,Medical microbiology,Microbiology,Immunodeficiency viruses,Retroviruses,Mental health and psychiatry,RNA viruses,Epidemiology,Renal diseases,Tuberculosis",South Africa,"These anonymized, perturbed data were provided for analysis by the Western Cape Department of Health, Provincial Health Data Centre. These are highly granular health data linked to individual health care clients in the province and no informed consent has been given for research use. For this reason, the Western Cape Department of Health does not permit open sharing but instead grants only primary use permission for the data. Re-use of this dataset requires approval from the Western Cape Department of Health (Provincial Health Data Centre), and Dr Moodley, Director: HIA, Western Cape Department of Health, South Africa can be contacted to advise on this process (email: melvin.moodley@westerncape.gov.za, Reference study ID 259-TIFFIN).",Method,Yes,No,N/A,N/A,N/A,N/A,Method,Yes,No,N/A,No,NA,NA,NA,NA
31/12/2020,2020,10.1371/journal.pone.0237622,"Measurement equipment,Professions,Pilots,Neurodegenerative diseases,Equipment,Alzheimer's disease,Medical conditions,Engineering and technology,Medicine and health sciences,Social sciences,Sociology,Medical risk factors,Mental health and psychiatry,Physiology,Neurology,Sleep,Dementia,Nervous system,People and places,Sleep deprivation,Social systems,Cerebrospinal fluid,Anatomy,Biology and life sciences,Physiological processes,Body fluids,Population groupings,Epidemiology",The Netherlands,"The data has been published in the DANS EASY repository, which is the Netherlands Institute for permanent access to digital research resources. The data are published under the following DOI: https://doi.org/10.17026/dans-x6b-km62.",Method,Yes,Yes,Online,"10.17026/dans-x6b-km62, https://doi.org/10.17026/dans-x6b-km62",N/A,Data Archiving and Networked Services (DANS),N/A,No,No,N/A,Yes,10.1101/2020.07.31.230342,01/08/2020,http://dx.doi.org/10.1101/2020.07.31.230342,bioRxiv
29/08/2019,2019,10.1371/journal.pone.0221971,"Metabolism,Medicine and health sciences,Linear regression analysis,Children,Obstetrics and gynecology,Neonates,Endocrine disorders,Gestational diabetes,Physical sciences,Labor and delivery,Age groups,Statistics,Birth,Women's health,Physiological parameters,Biochemistry,Developmental biology,Glucose tolerance,Body weight,Physiology,Mathematical and statistical techniques,Research and analysis methods,Biology and life sciences,Endocrinology,Metabolic disorders,Statistical methods,Population groupings,Maternal health,Weight gain,Regression analysis,Mathematics,Infants,People and places,Diabetes mellitus,Families",Brazil,Analysis scripts and data are available at https://github.com/mkshirley87/GDM-Brazil.,Fulltext,Yes,Yes,Supplementary Information|Online,https://github.com/mkshirley87/GDM-Brazil,N/A,Github,DA,Yes,Yes,Online,No,NA,NA,NA,NA
21/03/2019,2019,10.1371/journal.pone.0200229,"Birth defects,Chromatin modification,Biochemistry,DNA-binding proteins,Chromatin,Health care policy,Transcription factors,Congenital disorders,Proteins,MicroRNAs,Treatment guidelines,Developmental biology,Genetic loci,Epigenetics,Chromosome biology,Morphogenesis,Congenital heart defects,Gene regulation,DNA,DNA modification,Non-coding RNA,Cardiology,Regulatory proteins,Ventricular septal defects,Gene expression,Genetics,DNA methylation,Nucleic acids,Health care,Natural antisense transcripts,RNA,Biology and life sciences,Medicine and health sciences,Cell biology",United States of America,All relevant data are within the paper and its Supporting Information files.,Method,Yes,Yes,Supplementary Information,N/A,N/A,N/A,Method,Yes,No,N/A,Yes,10.1101/355768,25/06/2018,http://dx.doi.org/10.1101/355768,bioRxiv
10/11/2020,2020,10.1371/journal.pgen.1009129,"Genetic interference,Organisms,Entomology,Arthropoda,Drosophila melanogaster,Animal studies,Biological cultures,Mitochondria,Hyperexpression techniques,Cellular structures and organelles,Biological locomotion,Bioenergetics,RNA interference,Research and analysis methods,Invertebrates,293T cells,Zoology,Insects,Energy-producing organelles,Gene expression,Model organisms,Nucleic acids,Genetics,Biochemistry,Post-translational modification,Cell biology,Animals,Physiology,Drosophila,Molecular biology assays and analysis techniques,RNA,Climbing,Animal models,Cell lines,Eukaryota,Proteins,Molecular biology,Phosphorylation,Molecular biology techniques,Epigenetics,Gene expression and vector techniques,Biology and life sciences,Experimental organism systems,Phenotypes",United Kingdom,The data are held in the public repository figshare at https://figshare.com/s/0d8f5ea3d253710b21c0.,Method,Yes,Yes,Online,https://figshare.com/s/0d8f5ea3d253710b21c0,N/A,figshare,Method,Yes,No,N/A,No,NA,NA,NA,NA
31/12/2021,2021,10.1371/journal.pone.0259649,"Computer software,Materials science,Physical sciences,Software engineering,Medicine and health sciences,Electronics,Radiology and imaging,Materials,Radiation,Engineering and technology,Nuclear physics,Optical equipment,Telecommunications,Equipment,Diodes,Electronics engineering,Physics,Computer and information sciences,Lasers,Diode lasers,Semiconductors,Photodiodes,Ionizing radiation,Radiation effects",Malaysia,All data are within the paper.,Method,Yes,No,N/A,N/A,N/A,N/A,Method,Yes,No,N/A,No,NA,NA,NA,NA
16/06/2020,2020,10.1371/journal.pone.0234233,"Drugs,Public and occupational health,Social sciences,Social systems,Antimicrobials,Antibiotics,Antibiotic resistance,Pediatrics,Pharmacology,Microbiology,Pediatric infections,Microbial control,Infectious diseases,Hygiene,Sociology,Biology and life sciences,Infectious disease control,Nosocomial infections,Antimicrobial resistance,Medicine and health sciences",Indonesia,All relevant data are within the manuscript and its Supporting Information files.,Method,Yes,Yes,Supplementary Information,N/A,N/A,N/A,N/A,No,No,N/A,No,NA,NA,NA,NA
20/01/2021,2021,10.1371/journal.pcbi.1008617,"Eukaryota,Microbial evolution,Biology and life sciences,Virulence factors,Population dynamics,Computer and information sciences,Systems science,Dictyostelium discoideum,Cell motility,Organismal evolution,Population biology,Pathology and laboratory medicine,Dictyostelium,Model organisms,Experimental organism systems,Mathematics,Dictyosteliomycota,Physical sciences,Animal studies,Dynamical systems,Organisms,Cell biology,Protozoan models,Pathogen motility,Microbiology,Developmental biology,Medicine and health sciences,Protists,Evolutionary processes,Pathogens,Evolutionary biology,Life cycles,Slime molds,Evolutionary emergence,Research and analysis methods",Germany,All relevant data are within the manuscript and its Supporting information files.,Fulltext,Yes,No,N/A,N/A,N/A,N/A,N/A,No,No,N/A,No,NA,NA,NA,NA
12/05/2022,2022,10.1371/journal.pone.0268029,"Birth,Health care,Health care providers,Medicine and health sciences,People and places,Maternal health,Research design,Antenatal care,Postnatal care,Research and analysis methods,Geographical locations,Labor and delivery,Bangladesh,Postpartum care,Women's health,Health care facilities,Asia,Qualitative studies,Obstetrics and gynecology,Transportation,Engineering and technology",Bangladesh,"Due to ethical restrictions related to protecting study participants privacy and confidentiality, data access is restricted by the Ethical Review Committee of icddr,b. According to the icddr,b data policy (http://www.icddrb.org/policies), interested parties may contact Ms. Armana Ahmed (aahmed@icddrb.org) with further inquiries related to data access.",Method,Yes,Yes,Supplementary Information|Online,http://www.icddrb.org/policies,N/A,N/A,N/A,No,No,N/A,No,NA,NA,NA,NA
10/03/2022,2022,10.1371/journal.pone.0264992,"Maternal health,Cardiovascular diseases,Endocrinology,Medicine and health sciences,Cardiovascular disease risk,People and places,Diabetes mellitus,Type 2 diabetes risk,Metabolic disorders,Type 2 diabetes,Chronic kidney disease,Pregnancy,Geographical locations,Gestational diabetes,Nephrology,Medical conditions,Cardiology,Endocrine disorders,Medical risk factors,Europe,Epidemiology,Sweden,Renal diseases,Women's health,Cardiovascular medicine,European Union,Obstetrics and gynecology",Ireland,"Data are from the Swedish Medical Birth Register, National Patient Register and Swedish Renal Register. Data cannot be put into a public data repository due to Swedish confidentiality regulations for registry data. Details on the application procedures for data usage is available on the homepages of the respective registries: the Medical Birth Register (https://www.socialstyrelsen.se/en/statistics-and-data/registers/alla-register/the-swedish-medical-birth-register/); the National Patient Register (https://www.socialstyrelsen.se/en/statistics-and-data/registers/alla-register/the-national-patient-register/); and the Swedish Renal Register (https://www.medscinet.net/snr/).",Method,Yes,Yes,Online,"https://www.socialstyrelsen.se/en/statistics-and-data/registers/alla-register/the-national-patient-register/, https://www.medscinet.net/snr/, https://www.socialstyrelsen.se/en/statistics-and-data/registers/alla-register/the-swedish-medical-birth-register/",N/A,Socialstyrelsen,N/A,No,Yes,Online,No,NA,NA,NA,NA
24/04/2019,2019,10.1371/journal.pone.0215983,Missing,Japan,All relevant data are within the manuscript and its Supporting Information files. Datasets generated by the 16S rRNA gene amplicon sequencing reported in this study have been deposited in the DNA Data Bank of Japan under accession number DRA006851.,Method,Yes,Yes,Supplementary Information|Online,N/A,DRA006851,DDBJ Sequence Read Archive,Method,Yes,No,N/A,No,NA,NA,NA,NA
17/03/2020,2020,10.1371/journal.pone.0229975,"Population metrics,Mathematics,People and places,Biology and life sciences,Mathematical and statistical techniques,Population groupings,Statistical methods,European Union,Survival analysis,Italy,Surveys,Physical sciences,Research design,Statistics,Age groups,Clinical research design,Europe,Life expectancy,Research and analysis methods,Medicine and health sciences,Population biology,Geographical locations,Elderly,Greece,Public and occupational health,Survey research,Geriatrics",Russia,"This paper uses data from the Human Mortality Database (18), as well as SHARE Waves 1 and 6 (DOIs: 10.6103/SHARE.w1.700, 10.6103/SHARE.w6.700, see (21) for methodological details.",Fulltext,Yes,Yes,Online,"10.6103/SHARE.w6.700, 10.6103/SHARE.w1.700",N/A,"Survey of Health, Ageing and Retirement in Europe",N/A,No,No,N/A,No,NA,NA,NA,NA
05/10/2021,2021,10.1371/journal.pone.0258272,"Visible light,White light,Eukaryota,Invertebrates,Vertebrates,Marine and aquatic sciences,Fisheries science,Marine fish,Behavior,Crustaceans,Animals,Light,Social sciences,Marine biology,Fisheries,Physics,Agriculture,Psychology,Animal behavior,Crabs,Zoology,Arthropoda,Earth sciences,Physical sciences,Organisms,Electromagnetic radiation,Biology and life sciences,Fish,Aquaculture,Artificial light",Norway,All relevant data are within the manuscript and its Supporting Information files.,Method,Yes,Yes,Supplementary Information,N/A,N/A,N/A,Method,Yes,No,N/A,No,NA,NA,NA,NA
26/01/2021,2021,10.1371/journal.pcbi.1008641,"Cognitive linguistics,Combinatorics,Psychology,Mathematics,Cognitive psychology,Algebraic structures,Engineering and technology,Analogies,Geography,Human geography,Permutation,Learning,Cognition,Structural engineering,Earth sciences,Biology and life sciences,Physical sciences,Human mobility,Neuroscience,Linguistics,Learning and memory,Algebra,Built structures,Social sciences,Human learning,Cognitive science,Discrete mathematics",Japan,All relevant data are within the manuscript.,Fulltext,Yes,No,N/A,N/A,N/A,N/A,N/A,No,No,N/A,No,NA,NA,NA,NA
18/02/2022,2022,10.1371/journal.pone.0263815,"Engineering and technology,Sociology,Equipment,People and places,Social communication,Games,Research integrity,Families,Cell phones,Communication equipment,Social media,Communications,Age groups,Children,Computer and information sciences,Behavior,Recreation,Population groupings,Psychology,Addiction,Education,Biology and life sciences,Social networks,Schools,Network analysis,Research ethics,Science policy,Behavioral addiction,Social sciences,Adolescents",Switzerland,The study data and questionnaire are available here: https://osf.io/hwr2u,Method,Yes,Yes,Online,https://osf.io/hwr2u,N/A,Open Science Framework,Method,Yes,No,N/A,No,NA,NA,NA,NA
08/12/2021,2021,10.1371/journal.pone.0260365,"Criminology,Medicine and health sciences,Criminal justice system,Traumatic injury risk factors,Law and legal sciences,Policing,Medical risk factors,Police,Public and occupational health,Social sciences,Law enforcement,Research assessment,Theft,Violent crime,Assault,People and places,Sociology,Research and analysis methods,Population groupings,Professions,Crime,Epidemiology",Canada,All data files used as part of the present research are publicly available for download via the Chandler Police Departmentâ€™s Open Data Portal website. The â€œCalls for Serviceâ€ data file can be downloaded via: https://data.chandlerpd.com/catalog/calls-for-service/. The â€œGeneral Offense Reportsâ€ data file can be downloaded via https://data.chandlerpd.com/catalog/general-offenses/.,Fulltext,Yes,Yes,Online,"https://data.chandlerpd.com/catalog/calls-for-service/, https://data.chandlerpd.com/catalog/general-offenses/",N/A,N/A,N/A,No,No,N/A,No,NA,NA,NA,NA
11/10/2021,2021,10.1371/journal.pone.0257320,"Drug research and development,Education,Randomized controlled trials,Economics,Signs and symptoms,Schools,Research and analysis methods,Psychology,Research design,Drugs,Public and occupational health,Medicine and health sciences,Pain management,Clinical trials,Behavior,Analgesics,Opioids,Pharmacology,Sociology,Survey research,Questionnaires,Physical activity,Behavioral economics,Clinical medicine,Social sciences,Pain,Biology and life sciences",United States of America,All relevant data are within the manuscript and its Supporting information files.,Method,Yes,Yes,Supplementary Information,N/A,N/A,N/A,Method,Yes,No,N/A,No,NA,NA,NA,NA
06/07/2022,2022,10.1371/journal.pcbi.1010108,"Bacterial physiology,Genetics,Cellular structures and organelles,Gut bacteria,Bacteria,Nutrition,Simulation and modeling,Microbial physiology,Medicine and health sciences,Biology and life sciences,Medical microbiology,Microbial genomics,RNA,Algorithms,Applied mathematics,Diet,Cell biology,Non-coding RNA,Organisms,Nucleic acids,Bacteriology,Mathematics,Microbiome,Genomics,Research and analysis methods,Ribosomal RNA,Microbiology,Ribosomes,Biochemistry,Physical sciences",Canada,"The complete data set including operational taxonomic unit (OTU) abundance, short chain fatty acid content and the closest BLASTn classifications from the rat experiment can be found on GitHub at https://github.com/ajverster/BRACoD/tree/main/src/BRACoD/data. BRACoD and the code for simulating bacterial community abundance (with corresponding butyrate levels) is available with interfaces in both R and Python on GitHub at https://github.com/ajverster/BRACoD.",Method,Yes,Yes,Supplementary Information|Online,"https://github.com/ajverster/BRACoD, https://github.com/ajverster/BRACoD/tree/main/src/BRACoD/data",N/A,Github,DA|Method|Supplementary,Yes,Yes,Online,No,NA,NA,NA,NA
06/09/2019,2019,10.1371/journal.pone.0214829,"Biology and life sciences,Glucose tolerance tests,Biochemistry,Insulin,Cyclins,Anatomy,Hormones,Physiological processes,Metabolism,Homeostasis,Endocrinology,Estrogens,Blood sugar,Cell biology,Cell processes,Physiology,Physiological parameters,Body weight,Diagnostic medicine,Blood,Body fluids,Medicine and health sciences,Cell cycle and cell division,Diabetic endocrinology,Glucose tolerance",United States of America,All relevant data are within the manuscript and its Supporting Information files.,Fulltext,Yes,Yes,Supplementary Information,N/A,N/A,N/A,N/A,No,No,N/A,Yes,10.1101/586602,22/03/2019,http://dx.doi.org/10.1101/586602,bioRxiv
06/01/2021,2021,10.1371/journal.pone.0244614,"Ocular anatomy,Population groupings,Biology and life sciences,Anatomy,Ophthalmology,Retina,Ocular system,Eyes,Health care,Geriatrics,Geriatric ophthalmology,Geriatric care,Medicine and health sciences,Surgical and invasive medical procedures,Elderly,Cataract surgery,Age groups,Head,Vitrectomy,Adults,People and places,Ophthalmic procedures",Japan,All relevant data are within the manuscript and its Supporting Information files.,Method,Yes,Yes,Supplementary Information,N/A,N/A,N/A,Method,Yes,No,N/A,No,NA,NA,NA,NA
13/05/2019,2019,10.1371/journal.pgen.1008131,"Transcriptome analysis,Research and analysis methods,Biology and life sciences,Plant science,Mutation databases,Molecular evolution,Genetics,Database and informatics methods,Computational biology,Flowers,Plant anatomy,Departures from diploidy,Genome evolution,Deletion mutation,Gene expression,Genome analysis,Evolutionary biology,Leaves,Mutation,Biological databases,Genomics,Polyploidy",Sweden,SRA numbers of the previously published samples are listed in S1 Table. New sequences of the DNA and RNA samples will be deposited to NCBI and their SRA numbers will be added to S1 Table. Phased and unphased genomic and expression data will be deposited to the Dryad Digital Repository. All new data will be made available upon the acceptance of this manuscript.,Method,Yes,Yes,N/A,N/A,N/A,N/A,Method,Yes,No,N/A,Yes,10.1101/479048,28/11/2018,http://dx.doi.org/10.1101/479048,bioRxiv
13/11/2020,2020,10.1371/journal.pone.0242025,"Health care,Maternal health,Pediatrics,Clinical medicine,Birth,Infants,Body fluids,Age groups,Neonates,Biology and life sciences,Sepsis,Asphyxia,Children,Neonatal sepsis,Neonatology,People and places,Obstetric procedures,Amniotic fluid,Labor and delivery,Population groupings,Surgical and invasive medical procedures,Families,Women's health,Cesarean section,Obstetrics and gynecology,Neonatal care,Developmental biology,Signs and symptoms,Anatomy,Physiology,Medicine and health sciences",Ethiopia,All relevant data are within the manuscript and its Supporting Information files.,Method,Yes,No,N/A,N/A,N/A,N/A,N/A,No,No,N/A,Yes,10.21203/rs.3.rs-26317/v1,04/05/2020,http://dx.doi.org/10.21203/rs.3.rs-26317/v1,Research Square
10/07/2019,2019,10.1371/journal.pone.0219470,"Multi-drug-resistant tuberculosis,Pharmaceutics,RNA viruses,Microbiology,Tuberculosis diagnosis and management,Africa,Medicine and health sciences,Global health,Pathology and laboratory medicine,Mozambique,Medical microbiology,Pathogens,Viruses,People and places,Microbial pathogens,Immunodeficiency viruses,Lentivirus,Diagnostic medicine,Infectious diseases,Viral pathogens,Organisms,Drug therapy,Biology and life sciences,Tuberculosis,Geographical locations,Tropical diseases,Public and occupational health,Retroviruses,Bacterial diseases,HIV",Mozambique,All relevant data are within the manuscript and its Supporting Information files.,Method,Yes,Yes,Supplementary Information,N/A,N/A,N/A,Method,Yes,No,N/A,No,NA,NA,NA,NA
27/01/2020,2020,10.1371/journal.pone.0227942,"Eukaryota,Food,Chemistry,Carbohydrates,Biology and life sciences,Organic compounds,Flowering plants,Fats,Fluorescence recovery after photobleaching,Microscopy,Diet,Flour,Antioxidants,Light microscopy,Physical sciences,Plants,Onions,Organisms,Phenols,Medicine and health sciences,Vegetables,Organic chemistry,Wheat,Nutrition,Chemical compounds,Biochemistry,Grasses,Lipids,Research and analysis methods",Poland,All relevant data are within the paper.,Method,Yes,No,N/A,N/A,N/A,N/A,Method,Yes,No,N/A,No,NA,NA,NA,NA
27/01/2021,2021,10.1371/journal.pone.0245878,"Body fluids,Imaging techniques,Gastrointestinal motility disorders,Gastroenterology and hepatology,Herbal medicine,Oral administration,Gastrointestinal tract,Blood flow,Diagnostic radiology,Cardiovascular anatomy,Research and analysis methods,Physiology,Biology and life sciences,Engineering and technology,Pharmacology,Blood,Software engineering,Computer software,Anatomy,Aorta,Diagnostic medicine,Digestive system,Blood vessels,Computer and information sciences,Radiology and imaging,Complementary and alternative medicine,Magnetic resonance imaging,Routes of administration,Medicine and health sciences",Japan,All relevant data are within the manuscript and its Supporting Information files.,Method,Yes,No,N/A,N/A,N/A,N/A,N/A,No,No,N/A,No,NA,NA,NA,NA
21/02/2020,2020,10.1371/journal.pone.0229063,"Mathematics,DNA sequencing,DNA,Oncology,Polymerase chain reaction,Ligation assay,Spectrophotometry,Sequencing techniques,Next-generation sequencing,Molecular biology,Nucleic acids,Medicine and health sciences,Genome analysis,Genomics,Computational biology,Densitometry,Physical sciences,Genetics,Statistics,Sequence alignment,Transcriptome analysis,Molecular biology techniques,DNA libraries,Artificial gene amplification and extension,Spectrum analysis techniques,Biochemistry,Statistical noise,Diagnostic medicine,Bioinformatics,Molecular biology assays and analysis techniques,Research and analysis methods,Circulating tumor DNA,Biomarkers,Biology and life sciences,Cancer detection and diagnosis,Sequence analysis,Database and informatics methods",United States of America,"Data used to compile results and figures are provided as an Excel spreadsheet in the Supplemental Data Files as â€˜Data.xlsxâ€™. The BED file used during analysis has been included in the Supplemental Data Files as â€˜GrCh37Exons.bedâ€™. All sequencing data files (FASTQ) are available from the NCBI Sequence Read Archive database (https://www.ncbi.nlm.nih.gov/sra/PRJNA598001). For the singleton adapters, three files are available where R1 and R3 are insert data and R2 the molecular barcode for each fragment. For the duplex adapters, the molecular barcode data is part of the two data reads available (R1 and R2). To create the molecular barcodes for each fragment, combine the first three bp of read one and read two. Base six is the start of the insert sequence for both the data reads, so trim off the first 3 bp of the molecular barcode and 2 bp of the linker sequence before aligning. These data may be processed using the DNA consensus alignment workflows in https://github.com/HuntsmanCancerInstitute/Workflows/tree/master/Hg38RunnerWorkflows/DnaConsensusAlignQC.",Fulltext,Yes,Yes,Supplementary Information|Online,"https://github.com/HuntsmanCancerInstitute/USeq, https://github.com/HuntsmanCancerInstitute/Workflows/tree/master/Hg38RunnerWorkflows/DnaConsensusAlignQC, https://github.com/HuntsmanCancerInstitute/Workflows/blob/master/Alignment/alignQC_1.3.svgsee, https://support.illumina.com/sequencing/sequencing_software/bcl2fastq-conversion-software.html, https://github.com/HuntsmanCancerInstitute/Workflows/blob/master/Alignment/MolBarcodes/consensusAlignQC_0.4.svg, https://www.ncbi.nlm.nih.gov/sra/PRJNA598001",PRJNA598001,"Github, NCBI Sequence Read Archive",N/A,No,No,N/A,No,NA,NA,NA,NA
11/02/2021,2021,10.1371/journal.pone.0246318,"Critical care and emergency medicine,Mathematics,Metaanalysis,Population biology,Systematic reviews,Cardiology,COVID 19,Statistics,Medicine and health sciences,Respiratory disorders,Cardiovascular diseases,Health care,Research assessment,Biology and life sciences,Population metrics,Intensive care units,Physical sciences,Pulmonology,Chronic obstructive pulmonary disease,Health care facilities,Acute respiratory distress syndrome,Respiratory failure,Research and analysis methods,Statistical methods,Hospitals,Cardiovascular medicine,Infectious diseases,Medical conditions,Mathematical and statistical techniques,Viral diseases,Death rates",United States of America,Data is available on the Open Science Framework (OSF) repository at https://osf.io/u6hrd/?view_only=f33269ddec8042c39f72df5ffafc9a2a.,Method,Yes,Yes,Online,https://osf.io/u6hrd/?view_only=f33269ddec8042c39f72df5ffafc9a2a,N/A,Open Science Framework,N/A,No,No,N/A,Yes,10.21203/rs.3.rs-66766/v1,03/09/2020,http://dx.doi.org/10.21203/rs.3.rs-66766/v1,Research Square
07/10/2021,2021,10.1371/journal.pone.0257478,"Saccharomyces,Gene expression,Model organisms,Metabolic engineering,Liquid chromatography,Organisms,Plant science,Bioengineering,Analytical chemistry,Biology and life sciences,Mass spectrometry,Enzyme assays,Physical sciences,Eukaryota,Liquid chromatography-mass spectrometry,Chemistry,Chromatographic techniques,Bioassays and physiological analysis,Research and analysis methods,Engineering and technology,Animal studies,Leaves,Genetics,Experimental organism systems,Spectrum analysis techniques,Biochemistry,Biosynthesis,Saccharomyces cerevisiae,Biochemical analysis,Plant anatomy,Yeast,Fungi,Yeast and fungal models",Canada,All relevant data are within the paper and its Supporting information files.,Method,Yes,Yes,Supplementary Information,N/A,N/A,N/A,Method,Yes,No,N/A,No,NA,NA,NA,NA
01/04/2021,2021,10.1371/journal.pone.0249490,"Gastrointestinal tract,Digestive system,Anatomy,Diagnostic medicine,Vascular medicine,Research design,Medicine and health sciences,Biology and life sciences,Physiological processes,Endoscopy,Randomized controlled trials,Ingestion,Surgical and invasive medical procedures,Pharmacology,Clinical medicine,Clinical research design,Clinical trials,Signs and symptoms,Adverse events,Drug research and development,Hemorrhage,Small intestine,Research and analysis methods,Physiology",Canada,All relevant data are within the manuscript and its Supporting Information files.,Method,Yes,Yes,Supplementary Information,N/A,N/A,N/A,N/A,No,No,N/A,No,NA,NA,NA,NA
10/08/2020,2020,10.1371/journal.pone.0237250,"Neuroscience,Psychology,Labor economics,Medicine and health sciences,Statistics,Employment,Behavior,Physical sciences,Cognitive psychology,Social theory,Factor analysis,Social cognition,Regression analysis,Cognitive science,Biology and life sciences,Mental health and psychiatry,Social sciences,Jobs,Mathematical and statistical techniques,Psychological stress,Economics,Statistical methods,Research and analysis methods,Social psychology,Sociology,Mathematics",Poland,We share all datasets supporting our analyses through Mendeley data https://data.mendeley.com/datasets/n5gx5mgfrv/1.,Method,Yes,Yes,Online,https://data.mendeley.com/datasets/n5gx5mgfrv/1,N/A,Mendeley Data,Method,Yes,No,N/A,No,NA,NA,NA,NA
11/06/2020,2020,10.1371/journal.pone.0234056,"Haplotypes,Animal phylogenetics,Chile (country),Biogeography,Geography,Geographical locations,Genetic mapping,Parasitic protozoans,Islands,Ecology and environmental sciences,Trypanosoma cruzi,South America,Data management,Zoology,Evolutionary biology,Earth sciences,Heredity,Taxonomy,Computer and information sciences,Topography,Paleogenetics,Trypanosoma,Landforms,Geomorphology,Paleontology,Organisms,Genetics,Phylogenetics,Evolutionary systematics,People and places,Biology and life sciences,Protozoans,Eukaryota,Phylogenetic analysis",Chile,All relevant data are within the manuscript and its Supporting Information files.,Method,Yes,Yes,Supplementary Information,N/A,N/A,N/A,Method,Yes,No,N/A,No,NA,NA,NA,NA
24/03/2021,2021,10.1371/journal.pone.0248600,"Children,Educational attainment,Schools,Families,Professions,Computer and information sciences,Social sciences,Medicine and health sciences,Sociology,Internet,Medical risk factors,Psychology,Mental health and psychiatry,Education,Age groups,Adolescents,Teachers,People and places,Computer networks,Emotions,Biology and life sciences,Population groupings,Epidemiology",Australia,All relevant data are within the paper and its Supporting Information files.,Method,Yes,No,N/A,N/A,N/A,N/A,N/A,No,No,N/A,Yes,10.2196/preprints.35240,30/11/2021,http://dx.doi.org/10.2196/preprints.35240,Journal of Medical Internet Research
20/05/2021,2021,10.1371/journal.pone.0251966,"Epidemiology,Ultrasound imaging,Hospitals,Medical conditions,Pulmonology,Venous thromboembolism,Pneumonia,Imaging techniques,Viral diseases,Infectious diseases,Diagnostic radiology,Health care,Medicine and health sciences,Health care facilities,Deep vein thrombosis,Anatomy,Intensive care units,COVID 19,Biology and life sciences,Diagnostic medicine,Research and analysis methods,Thromboembolism,Vascular medicine,Radiology and imaging,Body limbs,Medical risk factors",Italy,All relevant data are within the paper.,Fulltext,Yes,No,N/A,N/A,N/A,N/A,N/A,No,No,N/A,No,NA,NA,NA,NA
04/05/2020,2020,10.1371/journal.pone.0232315,"Materials science,Diagnostic medicine,Plant products,Soft tissues,Materials,Photons,Physical sciences,Radiology and imaging,Biological tissue,Gelatin,Polymerization,Magnetic resonance imaging,Particle physics,Research and analysis methods,Polymer chemistry,Polymers,Animal products,Imaging techniques,Elementary particles,Anatomy,Diagnostic radiology,Ionization,Agronomy,Agriculture,Physics,Chemistry,Macromolecules,Biology and life sciences,Medicine and health sciences,Chemical reactions,Crop science,Vegetable oils",France,All relevant data are within the manuscript and its Supporting Information files.,Method,Yes,No,N/A,N/A,N/A,N/A,Method,Yes,No,N/A,No,NA,NA,NA,NA
15/04/2022,2022,10.1371/journal.pone.0267029,"Qualitative studies,Epidemiology,Medical risk factors,Isoniazid,Population groupings,Research and analysis methods,Medicine and health sciences,Research design,Tropical diseases,Tuberculosis,Professions,Nurses,Physicians,Medical conditions,People and places,Infectious diseases,Medical personnel,Screening guidelines,Health care policy,Drugs,Primary care,Bacterial diseases,Health care,Health care providers,Pharmacology",United States of America,"Data cannot be shared publicly as per our Kent Hospital Institutional Review Board approved protocol and approved consent form. Our approved consent specifically states that participant data that are potentially identifiable will not be shared. Given the nature of our qualitative transcripts and coding sheets, although stripped of identifiers such as names, they contain potentially identifiable and sensitive participant information in even the most aggregate form if shared with certain individuals who are familiar with our context. For further questions regarding the IRB approved protocol and consent, you may contact Dorinda Williams, the Kent Hospital IRB coordinator at dorwilliams@carene.org. Given the nature of our protocol and consent as described above and the potential to share sensitive human subject information, data access requests by qualified researchers can be made to Lynn Menatian at JMenatian@carene.org for further consideration.",Method,Yes,No,N/A,N/A,N/A,N/A,Method,Yes,No,N/A,No,NA,NA,NA,NA
23/04/2020,2020,10.1371/journal.pone.0231975,"Gram negative bacteria,Amino acid metabolism,Cell membranes,Enzymology,Cell biology,Enzyme chemistry,Proteins,Metabolic processes,Peptidoglycans,Physiological processes,Enzyme metabolism,Biochemistry,Physical sciences,Materials science,Materials,Physiology,Polymer chemistry,Macromolecules,Metabolism,Chemistry,Energy metabolism,Enzymes,Biology and life sciences,Cellular structures and organelles,Citric acid cycle,Bacteriology,Polymers,Medicine and health sciences,Microbiology",China,All relevant data are within the manuscript and its Supporting Information files.,Method,Yes,No,N/A,N/A,N/A,N/A,Method,Yes,No,N/A,No,NA,NA,NA,NA
16/07/2021,2021,10.1371/journal.pone.0254417,"Sociology,Traumatic injury risk factors,Educational attainment,Police,People and places,Education,Suicide,Criminology,Professions,Epidemiology,Criminal justice system,Ethnicities,Autopsy,Population groupings,Medicine and health sciences,Hispanic people,Public and occupational health,Medical risk factors,Mental health and psychiatry,Law and legal sciences,Law enforcement,Crime,Surgical and invasive medical procedures,Violent crime,Homicide,Social sciences",United States of America,"The narrative data used in this analysis are available by request from the CDC through their restricted-access data process. Our use of these restricted-access NVDRS data is governed by a Data Use Agreement (DUA) with the CDC. This DUA legally prohibits us from sharing these data with outside investigators. Any investigator can gain access to these restricted access NVDRS data by contacting nvdrs-rad@cdc.gov and following the procedures outlined here: https://www.cdc.gov/violenceprevention/datasources/nvdrs/dataaccess.html Other NVDRS data are publicly-available: https://www.cdc.gov/violenceprevention/datasources/nvdrs/datapublications.html. Cells with <5 observations have been suppressed in this publication, as required by the NVDRS Data Use Agreement.",Method,Yes,Yes,Online,"https://www.cdc.gov/violenceprevention/datasources/nvdrs/dataaccess.html, https://www.cdc.gov/violenceprevention/datasources/nvdrs/datapublications.html",N/A,Centre for Disease Control (CDC),Method,Yes,No,N/A,No,NA,NA,NA,NA
02/01/2019,2019,10.1371/journal.pone.0209354,"Children,Education,ADHD,Engineering and technology,Mental health and psychiatry,Age groups,Social sciences,Schools,Sports science,Sports,Biology and life sciences,Neurodevelopmental disorders,Accelerometers,Neuropsychiatric disorders,Medicine and health sciences,Parenting behavior,Developmental neuroscience,Electronics,Neuroscience,People and places,Psychology,Physical activity,Recreation,Families,Public and occupational health,Neurology,Sociology,Behavior,Population groupings",Australia,"The dataset used for the current study could be made available on reasonable request, as the datasets are not publicly available due to ethical restrictions (participants have not consented to the use of their data for purposes other than those for which they originally consented). An ethically compliant dataset may be made available via the Head of School (Exercise and Nutrition Sciences, hos-ens@deakin.edu.au) upon approval by the Deakin University Human Research Ethics Committee.",Method,Yes,No,N/A,N/A,N/A,N/A,N/A,No,No,N/A,No,NA,NA,NA,NA
12/05/2022,2022,10.1371/journal.pone.0268394,"Chemical compounds,Pyruvate,Physical sciences,Computer and information sciences,Organic chemistry,Carbohydrates,Metabolism,Metabolomics,Physiology,Acids,Ketones,Carbohydrate metabolism,Glucose metabolism,Biochemistry,Organic compounds,Metabolic networks,Energy metabolism,Network analysis,Monosaccharides,Alcohols,Chemistry,Ethanol,Physiological processes,Glucose,Biology and life sciences",United States of America,"Codes are available through GitHub (https://github.com/artedison/Edison_Lab_Shared_Metabolomics_UGA/tree/master/metabolomics_toolbox/code/net_ana). The experimental data can be found in Metabolomics Workbench (https://www.metabolomicsworkbench.org PR000738, DOI 10.21228/M88X0P). Other related data can be found in Supplementary materials.",Method,Yes,Yes,Supplementary Information|Online,"10.21228/M88X0P, https://www.metabolomicsworkbench.org, https://github.com/artedison/Edison_Lab_Shared_Metabolomics_UGA/tree/master/metabolomics_toolbox/code/net_ana",N/A,Github,DA|Method|Supplementary,Yes,Yes,Online,No,NA,NA,NA,NA
12/09/2019,2019,10.1371/journal.pone.0221559,"Conservation genetics,Phylogeography,Geography,Conservation biology,Genetic mapping,Population genetics,Forms of DNA,Nucleic acids,Population metrics,Earth sciences,Mitochondrial DNA,Ecology and environmental sciences,Genetics,Evolutionary biology,Conservation science,Geographical locations,South America,DNA,Genetic polymorphism,Population biology,Haplotypes,Population size,Heredity,Biology and life sciences,Biogeography,People and places,Argentina,Biochemistry",Argentina,All relevant data are within the paper. The mtDNA sequences described in the manuscript (GenBank accession MK780072-MK780080) are included.,Method,Yes,Yes,N/A,N/A,N/A,N/A,N/A,No,No,N/A,No,NA,NA,NA,NA
25/01/2022,2022,10.1371/journal.pone.0261838,"Grazing,Ecology,Ethiopia,Invasive species,Livestock,Ecology and environmental sciences,Agriculture,Acacia,Social sciences,Veterinary diseases,Animal management,Medicine and health sciences,Geographical locations,Flowering plants,Eukaryota,Species colonization,Behavior,Plants,Animal behavior,Zoology,People and places,Biology and life sciences,Organisms,Biodiversity,Traditional medicine,Complementary and alternative medicine,Psychology,Africa,Veterinary science",Ethiopia,All relevant data are within the manuscript and its Supporting information files.,Method,Yes,No,N/A,N/A,N/A,N/A,N/A,No,No,N/A,Yes,10.1101/2021.03.09.434549,10/03/2021,http://dx.doi.org/10.1101/2021.03.09.434549,bioRxiv
05/02/2020,2020,10.1371/journal.pone.0228746,"Social sciences,Physics,Cognitive psychology,Cognitive science,Sustainability science,Entropy,Finance,Thermodynamics,Financial management,Neuroscience,Physical sciences,Economics,Employment,Biology and life sciences,Built structures,Labor economics,Engineering and technology,Structural engineering,Cognition,Ecology and environmental sciences,Decision making,Psychology",Malaysia,All relevant data are within the manuscript and its Supporting Information files.,Fulltext,Yes,No,N/A,N/A,N/A,N/A,N/A,No,No,N/A,No,NA,NA,NA,NA
14/09/2020,2020,10.1371/journal.pone.0239057,"Biological locomotion,Social sciences,Behavior,Mathematics,Industrial engineering,Sports science,Regression analysis,Statistics,Psychology,Atmospheric science,Emotions,Running,Research and analysis methods,Physical sciences,Quality control,Visual inspection,Statistical methods,Biology and life sciences,Physiology,Engineering and technology,Sports,Linear regression analysis,Humidity,Human performance,Earth sciences,Recreation,Mathematical and statistical techniques,Meteorology",Norway,"All analyses were based on publicly available race reports from the International Biathlon Union (IBU) datacenter (2016), and permission to use the data for scientific purposes was given by the IBU. Link: https://biathlonresults.com/. Permission to use the data for scientific purposes was granted by the IBU secretary general at the time. Due to the data being owned by IBU, other authors are encouraged to contact IBU for the possibility to analyze biathlon race results. Informed consent from the athletes was not necessary to collect, due to the data being publicly available.",Method,Yes,Yes,Supplementary Information|Online,https://biathlonresults.com/,N/A,N/A,N/A,No,No,N/A,No,NA,NA,NA,NA
05/05/2022,2022,10.1371/journal.pone.0266816,"Autoimmune diseases,Ankylosing spondylitis,Epidemiology,Arthritis,Health care,Oncology,Immunology,Biology and life sciences,Fatigue,Cardiovascular medicine,Cardiology,Rheumatology,Sports and exercise medicine,Medicine and health sciences,Sports science,Pain,Clinical medicine,Medical conditions,Psoriatic arthritis,Cancer risk factors,Physical fitness,Signs and symptoms,Cardiovascular disease risk,Medical risk factors,Clinical immunology,Patients,Public and occupational health,Physical activity,Cardiovascular diseases,Exercise",Norway,"All relevant data are presented in the manuscript. Patient-level data is not publicly available in a repository, due to restrictions based upon privacy regulations and informed consent of the participants of potentially identifying and sensitive information. Resonable requests for data can be made to the Research Unit at SÃ¸rlandet Hospital Kristiansand, forskningsenheten@sshf.no, and will be assessed on a case-by-case basis upon appropriate approvals.",Method,Yes,No,N/A,N/A,N/A,N/A,N/A,No,No,N/A,No,NA,NA,NA,NA
22/07/2021,2021,10.1371/journal.pone.0255027,"Post-translational modification,Muscle cells,Muscle tissue,Sarcomeres,Cytosol,Electrophysiology,Muscle physiology,Cellular types,Cell biology,Cardiac muscles,Biological tissue,Research and analysis methods,Biochemistry,Physiology,Biology and life sciences,Phosphorylation,Animal cells,Bioassays and physiological analysis,Proteins,Simulation and modeling,Musculoskeletal system,Anatomy,Muscles,Electrophysiological techniques,Myofibrils,Medicine and health sciences,Muscle electrophysiology,Muscle contraction",Russia,All relevant data are within the paper and its Supporting Information files.,Method,Yes,Yes,Supplementary Information,N/A,N/A,N/A,Method,Yes,No,N/A,No,NA,NA,NA,NA
24/06/2020,2020,10.1371/journal.pgen.1008840,"Glucose,Chitin,Post-translational modification,Polymers,Organic compounds,Cell processes,Chemistry,Hyperexpression techniques,Biochemistry,Cell cycle and cell division,Macromolecules,Organic chemistry,Biology and life sciences,Biosynthesis,Physical sciences,Proteins,Galactose,Monosaccharides,Carbohydrates,Molecular biology techniques,Chemical compounds,Materials science,Molecular biology,Cell walls,Materials,Phosphorylation,Gene expression and vector techniques,Research and analysis methods,Cellular structures and organelles,Molecular biology assays and analysis techniques,Cell biology,Polymer chemistry",United States of America,All relevant data are within the manuscript and its Supporting Information files. The mass spectrometry proteomics data have been deposited to the ProteomeXchange Consortium via the PRIDE partner repository with the dataset identifier PXD018429.,Method,Yes,Yes,Supplementary Information,N/A,N/A,N/A,Method,Yes,No,N/A,Yes,10.1101/2020.04.22.055699,24/04/2020,http://dx.doi.org/10.1101/2020.04.22.055699,bioRxiv
06/06/2022,2022,10.1371/journal.pone.0265019,"Virus testing,Medicine and health sciences,Lesions,People and places,Sports and exercise medicine,Diagnostic medicine,Biology and life sciences,Recreation,Geographical locations,Clinical medicine,Sports science,Infectious diseases,Medical conditions,Social sciences,Europe,Behavior,Sports,Psychology,Signs and symptoms,Epidemiology,COVID 19,Asia,Headaches,Viral diseases,Russia",Poland,The raw datasets are uploaded as supplementary .xls file,Method,Yes,Yes,Supplementary Information,N/A,N/A,N/A,N/A,No,No,N/A,Yes,10.1101/2020.10.27.20220400,27/10/2020,http://dx.doi.org/10.1101/2020.10.27.20220400,medRxiv
26/03/2020,2020,10.1371/journal.pone.0230716,"Gastroenterology and hepatology,Carcinomas,Research and analysis methods,Oncology,Nucleic acids,Biochemistry,Cell biology,Genetics,Gene regulation,Molecular probe techniques,Oxidoreductases,Basic cancer research,Enzymology,Molecular biology techniques,Proteins,MicroRNAs,Metastasis,Medicine and health sciences,Biology and life sciences,Cell motility,RNA,Gastrointestinal tumors,Immunoblotting,Cancers and neoplasms,Non-coding RNA,Hepatocellular carcinoma,Natural antisense transcripts,Gene expression and vector techniques,Developmental biology,Hyperexpression techniques,Luciferase,Molecular biology assays and analysis techniques,Cell migration,Gene expression,Cancer cell migration,Carcinogenesis,Molecular biology,Liver diseases,Enzymes",China,All relevant data are within the manuscript and its Supporting Information files.,Method,Yes,Yes,Supplementary Information,N/A,N/A,N/A,N/A,No,No,N/A,No,NA,NA,NA,NA
17/03/2021,2021,10.1371/journal.pone.0248658,"Physical sciences,Bioengineering,Legs,Muscle electrophysiology,Musculoskeletal system,Physiology,Anatomy,Kinematics,Walking,Body limbs,Orthotics,Bioassays and physiological analysis,Engineering and technology,Classical mechanics,Ankles,Biological locomotion,Knees,Biology and life sciences,Feet,Medicine and health sciences,Physics,Skeleton,Biotechnology,Biomechanics,Skeletal joints,Electrophysiological techniques,Medical devices and equipment,Research and analysis methods,Electromyography",Canada,"Moisan, Gabriel (2021): Biomechanical effects of foot orthoses with and without a lateral bar in individuals with cavus feet during comfortable and fast walking. figshare. Dataset. https://doi.org/10.6084/m9.figshare.14166854.v1.",Method,Yes,Yes,Online,"https://doi.org/10.6084/m9.figshare.14166854.v1, 10.6084/m9.figshare.14166854.v1",N/A,figshare,Method,Yes,No,N/A,No,NA,NA,NA,NA
06/11/2019,2019,10.1371/journal.pone.0224268,"Insects,Species interactions,Electrophysiology,Blood,Population metrics,Physical sciences,Genetics,Eukaryota,Animals,Body fluids,Insect vectors,Arms,Body limbs,Heredity,Population biology,Invertebrates,Artificial membranes,Physiology,Anatomy,Organisms,Membrane potential,Arthropoda,Aedes aegypti,Hands,Inbreeding,Physical chemistry,Disease vectors,Surface chemistry,Chemistry,Fecundity,Infectious diseases,Biology and life sciences,Medicine and health sciences,Mosquitoes,Musculoskeletal system",Australia,All relevant data are within the manuscript and its Supporting Information files.,Method,Yes,Yes,Supplementary Information,N/A,N/A,N/A,N/A,No,No,N/A,Yes,10.1101/716142,26/07/2019,http://dx.doi.org/10.1101/716142,bioRxiv
16/04/2020,2020,10.1371/journal.pone.0231625,"Bacterial biofilms,Serratia,Enzymes,Swimming,Gene expression,Medicine and health sciences,Biofilms,Proteases,Bacteriology,Physiology,Pathogen motility,Pathogens,Biology and life sciences,Organisms,Medical microbiology,Pathology and laboratory medicine,Bacterial pathogens,Enterobacteriaceae,Enzymology,Biological locomotion,Microbiology,Microbial pathogens,Bacteria,Biochemistry,Virulence factors,Proteins,Genetics,Serratia marcescens",Egypt,All relevant data are within the paper.,Method,Yes,No,N/A,N/A,N/A,N/A,N/A,No,No,N/A,No,NA,NA,NA,NA
05/05/2021,2021,10.1371/journal.pone.0250973,"Parasitism,Pathogenesis,Invertebrates,Trophic interactions,Community ecology,Eukaryota,Ecology and environmental sciences,Psychology,Pathology and laboratory medicine,Animal sociality,Larvae,Arthropoda,Biological defense mechanisms,Medicine and health sciences,Social systems,Foraging,Species interactions,Animal physiology,Organisms,Behavior,Host-pathogen interactions,Insects,Hymenoptera,Entomology,Developmental biology,Ecology,Sociology,Animal behavior,Zoology,Ants,Animals,Social sciences,Biology and life sciences,Life cycles",Brazil,All relevant data are within the manuscript and its Supporting information files.,Method,Yes,Yes,Supplementary Information,N/A,N/A,N/A,Method,Yes,No,N/A,No,NA,NA,NA,NA
25/01/2022,2022,10.1371/journal.pone.0263058,"Marketing,Radiologists,Professions,Population groupings,Perception,Surgical excision,Reproductive system procedures,Women's health,Social sciences,Myomectomy,Cognitive science,Cognitive psychology,Medicine and health sciences,Medical personnel,Communications,Sensory perception,Advertising,Mental health therapies,Surgical and invasive medical procedures,Neuroscience,People and places,Biology and life sciences,Mental health and psychiatry,Obstetrics and gynecology,Personality,Sociology,Hysterectomy,Psychology",United States of America,"All quantitative data are available from the Dryad database DOI: https://doi.org/10.5061/dryad.qnk98sfjc. The qualitative data cannot be shared publicly because in accordance with the study Institutional Review Board given the potentially sensitive nature of the interviews and small number of participants, making even the anonymized transcripts potentially identifiable. Anonymized copies of the transcripts can be requested via the Northwestern University IRB (irb@northwestern.edu) and/or the authors for approved access.",Method,Yes,Yes,Online,"10.5061/dryad.qnk98sfjc, https://doi.org/10.5061/dryad.qnk98sfjc",N/A,Dryad Digital Repository,N/A,No,Yes,Online,No,NA,NA,NA,NA
24/06/2019,2019,10.1371/journal.pone.0218600,"Classical mechanics,Applied mathematics,Geophysics,Aerodynamics,Air flow,Earth sciences,Aluminum,Physics,Mechanical engineering,Engineering and technology,Numerical analysis,Atmospheric science,Optimization,Atmospheric physics,Physical sciences,Finite element analysis,Chemical elements,Dynamics,Propulsion,Convection,Chemistry,Interpolation,Mathematics,Mesosphere,Atmospheric layers,Rockets",Poland,All relevant data are within the manuscript. The data is also available in Zenodo repository: https://doi.org/10.5281/zenodo.3015592.,Method,Yes,Yes,Online,"10.5281/zenodo.3015592, https://doi.org/10.5281/zenodo.3015592",N/A,Zenodo,Method,Yes,No,N/A,Yes,10.20944/preprints202107.0056.v1,02/07/2021,http://dx.doi.org/10.20944/preprints202107.0056.v1,Preprints.org
06/02/2020,2020,10.1371/journal.pone.0228201,"Health care,Political science,Health care policy,Social sciences,Drugs,Public policy,Medical humanities,Education,Sociology,Medical education,Child and adolescent health policy,Drug policy,Social policy,Public and occupational health,Drug information,Pharmacology,Medicine and health sciences,Pediatrics",United Kingdom,"All data used for the analyses shown in this article are shown in three supplementary excel files, labelled tables S1 Table (QUM data), S2 Table (Policy data) and S3 Table (study comparison data) corresponding to the descriptions in the manuscript. The data used to compare policy impact on QUM in this study and the previous two published studies is also included (S3 Table).",Method,Yes,Yes,Supplementary Information,N/A,N/A,N/A,N/A,No,No,N/A,No,NA,NA,NA,NA
19/03/2019,2019,10.1371/journal.pone.0213202,"Medicine and health sciences,Chemistry,Linear regression analysis,Metabolic disorders,Positron emission tomography,Pancreas,Mathematical and statistical techniques,Radiology and imaging,Monosaccharides,Pathology and laboratory medicine,Endocrine system,Carbohydrates,Glucose,Immune response,Statistics,Imaging techniques,Endocrine disorders,Research and analysis methods,Exocrine glands,Statistical methods,Mathematics,Neuroscience,Body fluids,Inflammation,Blood sugar,Organic compounds,Chemical compounds,Physiology,Diagnostic medicine,Diabetes mellitus,Endocrinology,Regression analysis,Physical sciences,Organic chemistry,Signs and symptoms,Diagnostic radiology,Biology and life sciences,Blood,Anatomy,Tomography,Neuroimaging,Type 2 diabetes,Immunology",The Netherlands,All relevant data are within the manuscript and Supporting Information files.,Method,Yes,Yes,Supplementary Information,N/A,N/A,N/A,N/A,No,No,N/A,No,NA,NA,NA,NA
04/12/2019,2019,10.1371/journal.pone.0225629,"Sweden,Sociology,Research and analysis methods,People and places,Cross-sectional studies,Geographical locations,African people,Europe,Research design,European people,Psychological attitudes,Female genital mutilation,Swedish people,Ethnicities,European Union,Population groupings,Psychology,Education,Biology and life sciences,Sexual and gender issues,Schools,Social theory,Somalian people,Social sciences",Sweden,All relevant data are within the paper and its Supporting Information files.,Method,Yes,No,N/A,N/A,N/A,N/A,Method,Yes,No,N/A,No,NA,NA,NA,NA
12/12/2019,2019,10.1371/journal.pone.0226221,"Biology and life sciences,Engineering and technology,Transportation,Geographical locations,Geographic areas,Urban areas,Civil engineering,Pathology and laboratory medicine,Transportation infrastructure,Medicine and health sciences,Physiological processes,Coughing,People and places,Social sciences,Air pollution,Pollution,Geography,Behavior,Smoking habits,Pulmonology,Earth sciences,Roads,Asthma,Physiology,Ecology and environmental sciences,Psychology,Dyspnea,Norway,Habits,Diagnostic medicine,Europe,Signs and symptoms",Norway,"Under Norwegian law, data that has personal information cannot be publicly shared even if it is de-identified. Data are available from the Telemark study steering committee for researchers who meet the criteria for access. A permission from the Regional Ethics Review Board at Helse SÃ¸rÃ¸st, Oslo will also be necessary. Requests for data access should first be made both to Trude K. Fossum (fotr@sthf.no), who is head of the Telemark-study steering committee and to Anne Kristin M. Fell (annfel@sthf.no) who is head of the Telemark-study research group.",Method,Yes,No,N/A,N/A,N/A,N/A,N/A,No,No,N/A,No,NA,NA,NA,NA
05/11/2020,2020,10.1371/journal.pone.0240909,"Linguistics,Psychology,Cognition,Syntax,Memory,Cognitive science,Memory recall,Physical sciences,Mathematics,Social sciences,Arithmetic,Priming (psychology),Biology and life sciences,Neuroscience,Short term memory,Cognitive psychology,Learning and memory,Problem solving,Grammar",Belgium,All the relevant data and scripts are available from the Open Science Framework (DOI https://doi.org/10.17605/OSF.IO/6UTKF).,Method,Yes,Yes,Supplementary Information|Online,"https://doi.org/10.17605/OSF.IO/6UTKF, 10.17605/OSF.IO/6UTKF",N/A,Open Science Framework,DA,Yes,Yes,Online,No,NA,NA,NA,NA
22/07/2021,2021,10.1371/journal.pone.0254191,"Systematic reviews,Database searching,Medicine and health sciences,Human learning,Research and analysis methods,Neuroscience,Educational status,Education,Research assessment,Learning and memory,Randomized controlled trials,Clinical trials,Pharmacology,Psychology,Lectures,Population groupings,Clinical medicine,Biology and life sciences,Workshops,Learning,Database and informatics methods,People and places,Drug research and development,Cognitive science,Sociology,Social sciences,Undergraduates,Cognitive psychology",Poland,All relevant data are in the paper and its S1â€“S3 Files and S1 and S2 Datas and S1 and S2 Checklists and S1 Table.,Method,Yes,Yes,Supplementary Information,N/A,N/A,N/A,N/A,No,No,N/A,No,NA,NA,NA,NA
19/06/2020,2020,10.1371/journal.pone.0234077,"Biofilms,Electrodes,Physical sciences,Electronics,Research and analysis methods,Electrochemistry,Physiology,Physiological parameters,Engineering and technology,Hydrogen,Anodes,Oxidation,Microbiology,Biochemistry,Metabolism,Biological transport,Chemistry,Chemical elements,Biology and life sciences,Cell culturing techniques,Biofilm culture,Medicine and health sciences,Chemical reactions,Biological cultures",Germany,All relevant data are within the manuscript and its Supporting Information files.,Method,Yes,No,N/A,N/A,N/A,N/A,Method,Yes,No,N/A,No,NA,NA,NA,NA
08/11/2021,2021,10.1371/journal.pone.0259767,"Deserts,Ecosystem functioning,Africa,Biodiversity,Ecological niches,Plant anatomy,Geographical locations,People and places,Earth sciences,Ecosystems,Plant science,Biology and life sciences,Atmospheric science,Climate change,Leaves,Climatology,Ecology and environmental sciences,Ecology,Namibia,Terrestrial environments",Italy,Data cannot be shared publicly because they regard endangered populations of a species that is potentially sensitive to illegal collections. Data are available from the CNR-IRET Institutional Data Access (contact via segreteria@iret.cnr.it) for researchers who meet the criteria for access to confidential data.,Method,Yes,No,N/A,N/A,N/A,N/A,Method|Supplementary,Yes,Yes,Supplementary Information,Yes,10.1101/2020.02.19.955823,20/02/2020,http://dx.doi.org/10.1101/2020.02.19.955823,bioRxiv
29/05/2019,2019,10.1371/journal.pone.0217160,"Anatomy,Cholines,Liver diseases,Vitamins,Fatty liver,Monosaccharides,Medicine and health sciences,Glucose metabolism,Genetics,Chemistry,Chemical compounds,Physical sciences,Organic compounds,Hepatocytes,Cellular types,B vitamins,Cell biology,Animal cells,Lipids,Carbohydrate metabolism,Biochemistry,Glycogens,Metabolism,Carbohydrates,Glucose,Gene expression,Organic chemistry,Liver,Glycobiology,Gastroenterology and hepatology,Biology and life sciences",United States of America,All relevant data are within the manuscript and its Supporting Information files.,Method,Yes,Yes,Supplementary Information,N/A,N/A,N/A,Method,Yes,No,N/A,No,NA,NA,NA,NA
09/11/2020,2020,10.1371/journal.pone.0235239,"Histology,Biochemistry,Tendons,Stem cells,Biological tissue,Connective tissue,Collagens,Physiology,Embryology,Umbilical cord,Biomechanics,Cell biology,Biology and life sciences,Physiological processes,Ossification,Developmental biology,Regeneration,Morphogenesis,Mesenchymal stem cells,Organism development,Animal cells,Bone remodeling,Proteins,Anatomy,Medicine and health sciences,Cellular types",South Korea,All relevant data are within the manuscript and its Supporting information files.,Method,Yes,No,N/A,N/A,N/A,N/A,N/A,No,No,N/A,Yes,10.1101/2020.06.12.148544,13/06/2020,http://dx.doi.org/10.1101/2020.06.12.148544,bioRxiv
09/04/2019,2019,10.1371/journal.pone.0215006,"Medicine and health sciences,Animal products,Breast tissue,Nucleic acids,Non-coding RNA,Poultry,Biological tissue,Gene regulation,Food,Genetics,Reproductive system,RNA sequencing,Research and analysis methods,Fowl,RNA,Amniotes,Organisms,Vertebrates,Agriculture,Diet,Chickens,Gamefowl,Sequencing techniques,Molecular biology,Biochemistry,Biology and life sciences,Animals,Gene expression,Anatomy,Muscle tissue,Molecular biology techniques,Eukaryota,Birds,Nutrition,Long non-coding RNAs,Meat",China,"The RNA-Seq dataset supporting the conclusions of this article is available in Sequence Read Archive (SRA) at the National Center for Biotechnology Information (NCBI) under accession numbers SRR5367021, SRR5367022, SRR5367023, SRR5367024, SRR5367025 and SRR5367026.",Method,Yes,Yes,Supplementary Information|Online,N/A,SRR5367021,NCBI Sequence Read Archive,Method,Yes,No,N/A,No,NA,NA,NA,NA
[truncated: 51,851,194 more chars]
